# Supplementary material for: A Guide to Curating New World Melastomataceae Collections with a Linear Generic Sequence to World-Wide Melastomataceae
Source: Preprints.org preprint supplement (doi:10.20944/preprints202010.0203.v1), 2020-10-09
Supplement: Supplementary file 1 [file supplementary]

Table 1: Linear sequence of Melastomataceae genera, with their tribal assignment and estimated number of species.

­­­

| **Tribe/Clade** | **Linear Sequence** | **Genus** | **Authority** | **Distribution** | **# spp** |  |
| --- | --- | --- | --- | --- | --- | --- |
| Olisbeoideae | 1.10 | Lijndenia | Zoll. & Moritzi | Old World | 16 | 10 |
| Olisbeoideae | 1.20 | Memecylon | L. | Old World | 379 | 20 |
| Olisbeoideae | 1.30 | Spathandra | Guill. & Perr. | Old World | 2 | 30 |
| Olisbeoideae | 1.40 | Warneckea | Gilg | Old World | 49 | 40 |
| Olisbeoideae | 1.50 | Mouriri | Aubl. | New World | 89 | 50 |
| Olisbeoideae | 1.60 | Votomita | Aubl. | New World | 10 | 60 |
| Kibessieae | 2.10 | Pternandra | Jack | Old World | 18 | 10 |
| Astronieae | 3.10 | Tessmannianthus | Markgr. | New World | 7 | 10 |
| Astronieae | 3.20 | Astrocalyx | Merr. | Old World | 1 | 20 |
| Astronieae | 3.30 | Astronia | Blume | Old World | 60 | 30 |
| Astronieae | 3.40 | Astronidium | A.Gray | Old World | 70 | 40 |
| Astronieae | 3.50 | Beccarianthus | Cogn. | Old World | 10 | 50 |
| Lithobieae | 4.10 | Lithobium | Bong. | New World | 1 | 10 |
| Henrietteeae | 5.10 | Bellucia | Neck. ex Raf. | New World | 22 | 10 |
| Henrietteeae | 5.20 | Henriettea | DC. | New World | 71 | 20 |
| Henrietteeae | 5.30 | Kirkbridea | Wurdack | New World | 2 | 30 |
| Blakeeae | 6.10 | Chalybea | Naudin | New World | 11 | 10 |
| Blakeeae | 6.20 | Blakea | Browne | New World | 190 | 20 |
| Merianieae | 7.10 | Macrocentrum | Hook.f. | New World | 25 | 10 |
| Merianieae | 7.20 | Maguireanthus | Wurdack | New World | 1 | 20 |
| Merianieae | 7.30 | Salpinga | Mart. ex DC. | New World | 10 | 30 |
| Merianieae | 7.40 | Adelobotrys | DC. | New World | 31 | 40 |
| Merianieae | 7.50 | Graffenrieda | DC. | New World | 68 | 50 |
| Merianieae | 7.60 | Meriania | Sw. | New World | 121 | 60 |
| Merianieae | 7.70 | Axinaea | Ruiz & Pav. | New World | 41 | 70 |
| Merianieae | 7.80 | Centronia | D.Don | New World | 5 | 80 |
| Eriocnemeae | 8.10 | Ochthephilus | Wurdack | New World | 1 | 10 |
| Eriocnemeae | 8.20 | Eriocnema | Naudin | New World | 1 | 20 |
| Eriocnemeae | 8.30 | Physeterostemon | R.Goldenb. & Amorim | New World | 5 | 30 |
| Miconieae | 9.10 | Miconia | Ruiz & Pav. | New World | 1901 | 10 |
| Unplaced | 10.10 | Dinophora | Benth. | Old World | 1 | 10 |
| Unplaced | 10.20 | Ochthocharis | Blume | Old World | 8 | 20 |
| Bertolonieae | 11.10 | Bertolonia | Raddi | New World | 35 | 10 |
| Sonerileae | 12.10 | Boyania | Wurdack | New World | 2 | 10 |
| Sonerileae | 12.20 | Opisthocentra | Hook.f. | New World | 1 | 20 |
| Sonerileae | 12.30 | Phainantha | Gleason | New World | 5 | 30 |
| Sonerileae | 12.40 | Tryssophyton | Wurdack | New World | 2 | 40 |
| Sonerileae | 12.50 | Neblinanthera | Wurdack | New World | 1 | 50 |
| Sonerileae | 12.60 | Tateanthus | Gleason | New World | 1 | 60 |
| Sonerileae | 12.70 | Amphiblemma | Naudin | Old World | 15 | 70 |
| Sonerileae | 12.80 | Calvoa | J. D. Hooker | Old World | 20 | 80 |
| Sonerileae | 12.90 | Cincinnobotrys | Gilg | Old World | 6 | 90 |
| Sonerileae | 12.100 | Dicellandra | J. D. Hooker | Old World | 3 | 100 |
| Sonerileae | 12.110 | Gravesia | Naudin | Old World | 115 | 110 |
| Sonerileae | 12.120 | Preussiella | Gilg. | Old World | 2 | 120 |
| Sonerileae | 12.130 | Medinilla | Gaudichaud-Beupre | Old World | 360 | 130 |
| Sonerileae | 12.140 | Allomorphia | Blume | Old World | - | 140 |
| Sonerileae | 12.150 | Anerincleistus | P. W. Korthals | Old World | 39 | 150 |
| Sonerileae | 12.160 | Aschistanthera | C. Hansen | Old World | 1 | 160 |
| Sonerileae | 12.170 | Barthea | J. D. Hooker | Old World | 1 | 170 |
| Sonerileae | 12.180 | Blastus | Loureiro | Old World | 12 | 180 |
| Sonerileae | 12.190 | Boerlagea | Cogn. | Old World | 1 | 190 |
| Sonerileae | 12.200 | Bredia | Blume | Old World | 10 | 200 |
| Sonerileae | 12.210 | Brittenia | Cogn. | Old World | 1 | 210 |
| Sonerileae | 12.220 | Campimia | C. Hansen | Old World | 3 | 220 |
| Sonerileae | 12.230 | Catanthera | F.V. Muller | Old World | 17 | 230 |
| Sonerileae | 12.240 | Cyanandrium | Stapf | Old World | 5 | 240 |
| Sonerileae | 12.250 | Cyphotheca | Diels | old World | 1 | 250 |
| Sonerileae | 12.260 | Driessenia | P. W. Korthals | Old World | 14 | 260 |
| Sonerileae | 12.270 | Enaulophyton | Steenis | Old World | 2 | 270 |
| Sonerileae | 12.280 | Fordiophyton | Bullock | Old World | 14 | 280 |
| Sonerileae | 12.290 | Heteroblemma | (Blume) Cámara-Leret, Ridd.-Num. & Veldk. | Old World | 14 | 290 |
| Sonerileae | 12.300 | Kendrickia | J. D. Hooker | Old World | 1 | 300 |
| Sonerileae | 12.310 | Kerriothyrsus | C. Hansen | Old World | 1 | 310 |
| Sonerileae | 12.320 | Neodriessenia | Nayar | Old World | 6 | 320 |
| Sonerileae | 12.330 | Oxyspora | DC. | Old World | 50 | 330 |
| Sonerileae | 12.340 | Pachycentria | Blume | Old World | 8 | 340 |
| Sonerileae | 12.350 | Phyllagathis | Blume | Old World | 58 | 350 |
| Sonerileae | 12.360 | Plagiopetalum | Rehd. | Old World | 2 | 360 |
| Sonerileae | 12.370 | Plethiandra | J. D. Hooker | Old World | 7 | 370 |
| Sonerileae | 12.380 | Pogonanthera | Blume | Old World | - | 380 |
| Sonerileae | 12.400 | Poikilogyne | E.G.Baker | Old World | 26 | 400 |
| Sonerileae | 12.410 | Poilannammia | C. Hansen | Old World | 4 | 410 |
| Sonerileae | 12.420 | Sarcopyramis | Wallich | Old World | 2 | 420 |
| Sonerileae | 12.430 | Scorpiothyrsus | Hui-Lin Li | Old World | 3 | 430 |
| Sonerileae | 12.440 | Sonerila | Roxburgh | Old World | 160 | 440 |
| Sonerileae | 12.450 | Sporoxeia | W.W.Smith | Old World | 7 | 450 |
| Sonerileae | 12.460 | Stussenia | C. Hansen | Old World | 1 | 460 |
| Sonerileae | 12.470 | Styrophyton | Hu | old World | 1 | 470 |
| Sonerileae | 12.480 | Tashiroea | Matsum. | Old World | 9 | 480 |
| Sonerileae | 12.490 | Trigidiopalma | Chen | Old World | 1 | 490 |
| Sonerileae | 12.500 | Tylanthera | C. Hansen | Old World | 2 | 500 |
| Sonerileae | 12.510 | Vietsenia | C. Hansen | Old World | 4 | 510 |
| Unplaced | 13.10 | Feliciadamia | Bullock | Old World | 1 | 10 |
| Trioleneae | 14.10 | Monolena | Triana ex Benth. & Hook.f. | New World | 16 | 10 |
| Trioleneae | 14.20 | Triolena | Naudin | New World | 27 | 20 |
| Cyphostyleae | 15.10 | Wurdastom | B.Walln. | New World | 9 | 10 |
| Cyphostyleae | 15.20 | Allomaieta | Gleason | New World | 9 | 20 |
| Cyphostyleae | 15.30 | Alloneuron | Pilg. | New World | 5 | 30 |
| Cyphostyleae | 15.40 | Quipuanthus | Michelang. & C.Ulloa | New World | 1 | 40 |
| Cambessedesieae | 16.10 | Cambessedesia | DC. | New World | 25 | 10 |
| Cambessedesieae | 16.20 | Merianthera | Kuhlm. | New World | 7 | 20 |
| Cambessedesieae | 16.30 | Huberia | DC. | New World | 37 | 30 |
| Cambessedesieae | 16.40 | Bisglaziovia | Cogn. | New World | 1 | 40 |
| Dissochaeteae | 17.30 | Dalenia | Korth. | Old World |  | 30 |
| Dissochaeteae | 17.60 | Dissochaeta | Blume | Old World | 54 | 60 |
| Dissochaeteae | 17.40 | Diplectria | (Blume) H.G.L.Reichnbach | Old World | 11 | 40 |
| Dissochaeteae | 17.50 | Macrolenes | Naudin ex Miquel | Old World | 17 | 50 |
| Dissochaeteae | 17.20 | Creochiton | Blume | Old World | 12 | 20 |
| Dissochaeteae | 17.10 | Pseudodissochaeta | Nayar | Old World | 5 | 10 |
| Unplaced | 18.10 | Rupestrea | R.Goldenb., Almeda & Michelang. | New World | 2 | 10 |
| Rhexieae | 19.10 | Pachyloma | DC. | New World | 4 | 10 |
| Rhexieae | 19.20 | Arthrostemma | Pav. ex D. Don | New World | 4 | 20 |
| Rhexieae | 19.30 | Rhexia | L. | New World | 13 | 30 |
| Microliceae | 20.10 | Rhynchanthera | DC. | New World | 20 | 10 |
| Microliceae | 20.20 | Poteranthera | Bong. | New World | 5 | 20 |
| Microliceae | 20.30 | Microlicia | D. Don | New World | 175 | 30 |
| Microliceae | 20.40 | Lavoisiera | DC. | New World | 41 | 40 |
| Microliceae | 20.50 | Chaetostoma | DC. | New World | 12 | 50 |
| Microliceae | 20.60 | Trembleya | DC. | New World | 16 | 60 |
| Microliceae | 20.70 | Stenodon | Naudin | New World | 2 | 70 |
| Marcetieae | 21.10 | Comoliopsis | Wurdack | New World | 3 | 10 |
| Marcetieae | 21.20 | Pseudoernestia | Krasser | New World | 2 | 20 |
| Marcetieae | 21.30 | Dicrananthera | C.Presl | New World | 1 | 30 |
| Marcetieae | 21.40 | Comolia | DC. | New World | 12 | 40 |
| Marcetieae | 21.50 | Mallophyton | Wurdack | New World | 1 | 50 |
| Marcetieae | 21.60 | Acanthella | Hook.f. | New World | 2 | 60 |
| Marcetieae | 21.70 | Rostranthera | M.J.Rocha & P.J.F.Guim. | New World | 1 | 70 |
| Marcetieae | 21.80 | Noteropila | Mart. | New World | 6 | 80 |
| Marcetieae | 21.90 | Acisanthera | P.Browne | New World | 8 | 90 |
| Marcetieae | 21.100 | Sandemania | Gleason | New World | 1 | 100 |
| Marcetieae | 21.110 | Leiostegia | Benth. | New World | 1 | 110 |
| Marcetieae | 21.120 | Siphanthera | Pohl | New World | 15 | 120 |
| Marcetieae | 21.130 | Macairea | DC. | New World | 22 | 130 |
| Marcetieae | 21.140 | Ernestia | DC. | New World | 14 | 140 |
| Marcetieae | 21.150 | Appendicularia | DC. | New World | 3 | 150 |
| Marcetieae | 21.160 | Brasilianthus | Almeda & Michelang. | New World | 1 | 160 |
| Marcetieae | 21.170 | Nepsera | Naudin | New World | 1 | 170 |
| Marcetieae | 21.180 | Fritzschia | Cham. | New World | 12 | 180 |
| Marcetieae | 21.190 | Aciotis | D. Don | New World | 13 | 190 |
| Marcetieae | 21.200 | Marcetia | DC. | New World | 30 | 200 |
| Melastomateae | 22.10 | Loricalepis | Brade | New World | 2 | 10 |
| Melastomateae | 22.20 | Pterolepis | (DC.) Miq. | New World | 16 | 20 |
| Melastomateae | 22.30 | Pterogastra | Naudin | New World | 3 | 30 |
| Melastomateae | 22.40 | Desmoscelis | Naudin | New World | 2 | 40 |
| Melastomateae | 22.50 | Centradenia | G. Don | New World | 4 | 50 |
| Melastomateae | 22.60 | Pilocosta | Almeda & Whiffin | New World | 5 | 60 |
| Melastomateae | 22.70 | Heterocentron | Hook. & Arn. | New World | 14 | 70 |
| Melastomateae | 22.80 | Schwackaea | Cogn. | New World | 1 | 80 |
| Melastomateae | 22.90 | Bucquetia | DC. | New World | 3 | 90 |
| Melastomateae | 22.100 | Castratella | Naudin | New World | 2 | 100 |
| Melastomateae | 22.110 | Chaetolepis | (DC.) Miq. | New World | 10 | 110 |
| Melastomateae | 22.120 | Monochaetum | (DC.) Naudin | New World | 53 | 120 |
| Melastomateae | 22.130 | Andesanthus | P.J.F.Guim. & Michelang. | New World | 9 | 130 |
| Melastomateae | 22.140 | Tibouchina | Aubl. | New World | 39 | 140 |
| Melastomateae | 22.150 | Pleroma | D. Don | New World | 161 | 150 |
| Melastomateae | 22.160 | Chaetogastra | D. Don | New World | 117 | 160 |
| Melastomateae | 22.170 | Brachyotum | (DC.) Triana | New World | 55 | 170 |
| Melastomateae | 22.180 | Guyonia | Naudin | Old World | 14 | 180 |
| Melastomateae | 22.190 | Anaheterotis | Ver.-Lib. & G.Kadereit | Old World | 1 | 190 |
| Melastomateae | 22.200 | Argyrella | Naudin | Old World | 7 | 200 |
| Melastomateae | 22.210 | Tristemma | Juss | Old World | 16 | 210 |
| Melastomateae | 22.220 | Melastomastrum | Naudin | Old World | 6 | 220 |
| Melastomateae | 22.230 | Cailliella | Jacq-Fél. | Old World | 1 | 230 |
| Melastomateae | 22.240 | Dichaetanthera | Endl. | Old World | 36 | 240 |
| Melastomateae | 22.250 | Dissotidendron | (A.Fern. & R.Fern.) Veranso-Libalah & G.Kadereit | Old World | 11 | 250 |
| Melastomateae | 22.260 | Heterotis | Benth. | Old World | 6 | 260 |
| Melastomateae | 22.270 | Dupineta | (Sm.) Raf. | Old World | 5 | 270 |
| Melastomateae | 22.280 | Nothodissotis | Veranso-Libalah & G.Kadereit | Old World | 2 | 280 |
| Melastomateae | 22.290 | Pseudosbeckia | A.Fern. & R.Fern. | Old World | 1 | 290 |
| Melastomateae | 22.300 | Rosettea | Ver.-Lib. & G.Kadereit | Old World | 21 | 300 |
| Melastomateae | 22.310 | Derosiphia | Raf. | Old World | 1 | 310 |
| Melastomateae | 22.320 | Dissotis | Benth. | Old World | 6 | 320 |
| Melastomateae | 22.330 | Nerophila | Naudin | Old World | 8 | 330 |
| Melastomateae | 22.340 | Antherotoma | (Naudin) J. D. Hooker | Old World | 10 | 340 |
| Melastomateae | 22.350 | Almedanthus | Ver.-Lib. & R.D.Stone | Old World | 1 | 350 |
| Melastomateae | 22.360 | Eleotis | Ver.-Lib. & R.D.Stone | Old World | 4 | 360 |
| Melastomateae | 22.370 | Pyrotis | Ver.-Lib. & R.D.Stone | Old World | 1 | 370 |
| Melastomateae | 22.380 | Feliciotis | Ver.-Lib. & G.Kadereit | Old World | 12 | 380 |
| Melastomateae | 22.390 | Dionychastrum | A.Fern. & R.Fern. | Old World | 1 | 390 |
| Melastomateae | 22.400 | Amphorocalyx | J. G. Baker | Old World | 5 | 400 |
| Melastomateae | 22.410 | Dionycha | Naudin | Old World | 3 | 410 |
| Melastomateae | 22.420 | Rousseauxia | DC. | Old World | 13 | 420 |
| Melastomateae | 22.430 | Melastoma | L. | Old World | 75 | 430 |
| Melastomateae | 22.440 | Osbeckia | L. | Old World | 30 | 440 |
| Melastomateae | 22.450 | Otanthera | Blume | Old World | 3 | 450 |
| Unplaced | 23.10 | Centradeniastrum | Cogn. | New World | 2 | 10 |
| Unplaced | 23.20 | Stanmarkia | Almeda | New World | 2 | 20 |

Table 2: New genera of New World Melastomataceae published since 2005.

| **Genus** | **Status** | **Tribe** | **Species former placement** |
| --- | --- | --- | --- |
| *Andesanthus* | New | Melastomatoideae | *Tibouchina* |
| *Brasilianthus* | New | Marcetieae | NEW |
| *Chaetogastra* | Resurrected | Melastomatoideae | *Tibouchina* |
| *Dicrananthera* | Resurrected | Marcetieae | *Acisanthera* |
| *Leiostegia* | Resurrected | Marcetieae | *Comolia* |
| *Noterophila* | Resurrected | Marcetieae | *Acisanthera* |
| *Physeterostemon* | New | Eriocnemeae | NEW |
| *Pleroma* | Resurrected | Melastomatoideae | *Tibouchina* |
| *Pseudoernestia* | Resurrected | Marcetieae | *Ernestia* |
| *Quipuanthus* | New | Cyphostyleae | NEW |
| *Rostranthera* | New | Marcetieae | *Acisanthera* |
| *Rupestrea* | New | unplaced | *Miconia* |

Table 3: Genera of New World Melastomataceae synonymized since 2005

| **Tribe** | **Genus** | **Currently Accepted as:** |
| --- | --- | --- |
| Blakeeae | *Huilaea* | *Chalybea* |
| Blakeeae | *Topobea* | *Blakea* |
| Cambessedessiae | *Behuria* | *Huberia* |
| Cambessedessiae | *Benevidesia* | *Huberia* |
| Cambessedessiae | *Dolichoura* | *Huberia* |
| Henrietteeae | *Henriettella* | *Henriettea* |
| Henrietteeae | *Llewellynia* | *Henriettea* |
| Henrietteeae | *Loreya* | *Bellucia* |
| Henrietteeae | *Myriaspora* | *Bellucia* |
| Melastomateae | *Itatiaia* | *Pleroma* |
| Melastomateae | *Microlepis* | *Pleroma* |
| Melastomateae | *Schizocentron* | *Heterocentron* |
| Melastomateae | *Svitramia* | *Pleroma* |
| Melastomateae | *Tibouchinopsis* | *Pleroma* |
| Miconieae | *Anaectocalyx* | *Miconia* |
| Miconieae | *Calycogonium* | *Miconia* |
| Miconieae | *Catocoryne* | *Miconia* |
| Miconieae | *Charianthus* | *Miconia* |
| Miconieae | *Clidemia* | *Miconia* |
| Miconieae | *Conostegia* | *Miconia* |
| Miconieae | *Heterotrichum* | *Miconia* |
| Miconieae | *Icaria* | *Miconia* |
| Miconieae | *Killipia* | *Miconia* |
| Miconieae | *Leandra* | *Miconia* |
| Miconieae | *Mecranium* | *Miconia* |
| Miconieae | *Necranium* | *Miconia* |
| Miconieae | *Ossaea* | *Miconia* |
| Miconieae | *Pachyanthus* | *Miconia* |
| Miconieae | *Pentossaea* | *Miconia* |
| Miconieae | *Platycentrum* | *Miconia* |
| Miconieae | *Pleiochiton* | *Miconia* |
| Miconieae | *Sagraea* | *Miconia* |
| Miconieae | *Tetrazygia* | *Miconia* |
| Miconieae | *Tococa* | *Miconia* |
| Triolenae | *Diolena* | *Triolena* |
| Triolenae | *Diplarpea* | *Triolena* |

Table 4: Formerly and currently accepted names for species of New World Melastomataceae that have changed genera since 2010.

| **Formerly accepted name** | **Currently accepted name** |
| --- | --- |
| Acisanthera bivalvis (Aubl.) Cogn. | Noterophila bivalvis (Aubl.) Kriebel & M.J.R.Rocha |
| Acisanthera crassipes (Naudin) Wurdack | Noterophila crassipes (Naudin) Kriebel & M.J.R.Rocha |
| Acisanthera genliseoides (Hoehne) Wurdack | Noterophila genliseoides (Hoehne) Kriebel & M.J.R.Rocha |
| Acisanthera hedyotoidea (C.Presl.) Triana | Dicrananthera hedyotoidea C.Presl. |
| Acisanthera limnobios (DC.) Triana | Noterophila limnobios (DC.) Mart. |
| Acisanthera nana Ule | Noterophila nana (Ule) Kriebel & M.J.R.Rocha |
| Acisanthera quadrata | Acisanthera erecta J.St.-Hil |
| Acisanthera rosulans Huber | Noterophila rosulans (Huber) Kriebel & M.J.R.Rocha |
| Acisanthera tetraptera (Cogn.) Gleason | Rostranthera tetraptera (Cogn.) M.J.R.Rocha & P.J.F.Guim. |
| Adelobotrys antioquiensis Wurdack | Meriania hoyosii (Wurdack) Almeda & Penneys |
| Anaectocalyx bracteosa (Naudin) Triana ex Cogn.+ | Miconia bracteosa (Naudin) Michelang. |
| Anaectocalyx latifolia Cogn. | Miconia anaectocalyx Michelang. |
| Anaectocalyx manarae Wurdack | Miconia manarae (Wurdack) Michelang. |
| Appendicularia rubra (Pulle.) M.J.R.Rocha & P.J.F.Guim. | Ernestia rubra Pulle |
| Behuria capixaba R. Goldenb. & Reginato | Huberia capixaba (R.Goldenb. & Reginato) Bochorny & Michelang. |
| Behuria comosa R. Tavares, Baumgratz & R. Goldenb. | Huberia capixaba (R.Goldenb. & Reginato) Bochorny & Michelang. |
| Behuria cordifolia Cogn. | Huberia cordifolia (Cogn.) Bochorny & R.Goldenb. |
| Behuria corymbosa Cogn. | Huberia corymbosa (Cogn.) Bochorny & R.Goldenb. |
| Behuria edmundoi Brade | Huberia edmundoi (Brade) Bochorny & R.Goldenb. |
| Behuria glaziouviana Cogn. | Huberia hirsuta Bochorny & R.Goldenb. |
| Behuria glutinosa Cogn. | Huberia glutinosa (Cogn.) Bochorny & R.Goldenb. |
| Behuria huberioides Brade | Huberia huberioides (Brade) Bochorny & R.Goldenb. |
| Behuria insignis Cham. | Huberia insignis (Cham.) Bochorny & R.Goldenb. |
| Behuria limae Brade | Huberia limae (Brade) Bochorny & R. Goldenb. |
| Behuria lumiarensis Bochorny, Michelang. & R. Goldenb. | Huberia lumiarensis (Bochorny, Michelang. & R.Goldenb.) Bochorny |
| Behuria magdalenensis (Brade) R. Tavares & Baumgratz | Huberia magdalenensis (Brade) Bochorny & R.Goldenb. |
| Behuria mestrealvarensis D.T. Iglesias & R. Goldenb. | Huberia mestrealvarensis (D.T.Iglesias & R.Goldenb.) Bochorny & Michelang. |
| Behuria mouraei Cogn. | Huberia mourae (Cogn.) Bochorny & R. Goldenb. |
| Behuria organensis (Saldanha & Cogn.) R. Tavares & Baumgratz | Huberia organensis (Saldanha & Cogn.) Bochorny & R.Goldenb. |
| Behuria parvifolia Cogn. | Huberia minutifolia Bochorny & R.Goldenb. |
| Behuria souza-limae Brade | Huberia souzalimae (Brade) Bochorny & R.Goldenb. |
| Calycogonium angulatum Griseb. | Miconia angulata (Griseb.) M. Gómez |
| Calycogonium apiculatum Urb. & Ekman | Miconia rufistellata Judd & Majure |
| Calycogonium apleurum (Urb. & Ekman) Judd & Skean | Miconia apleura (Urb. & Ekman) Judd & Becquer |
| Calycogonium bairdianum Skean, Judd, Clase & Peguero | Miconia bairdiana ((Skean, Judd, Clase & Peguero) Skean & Judd |
| Calycogonium bissei Becquer | Miconia bissei (Becquer) Bécquer & Michelang |
| Calycogonium brevifolium Urb. & Ekman | Miconia brevifolia ((Urb. & Ekman)) Skean & Judd |
| Calycogonium calycopteris (Rich.) Urb | Miconia calycopteris (Rich.) Judd, Bécquer & Majure |
| Calycogonium clidemioides Griseb. | Miconia baracoana M. Gómez |
| Calycogonium cocoense Alain | Miconia liogeri Bécquer & Michelang |
| Calycogonium domatiatum Urb. & Ekman | Miconia domatiata (Urb. & Ekman) Skean & Judd |
| Calycogonium ekmanii Urb. | Miconia erikmaniana Skean & Judd |
| Calycogonium ellipticum C.Wright | Miconia ellipitica (C.Wright) M. Gomez |
| Calycogonium floribundum Borhidi | Miconia cupeyalensis Bécquer & Michelang |
| Calycogonium formonense Judd, Skean & Clase | Miconia formonensis (Judd, Skean & Clase) Judd, Bécquer & Majure |
| Calycogonium glabratum (Sw.) DC. | Miconia glabrifolia Skean, Judd, Majure & Bécquer |
| Calycogonium grisebachii Triana | Miconia grisebachiana Bécquer & Michelang |
| Calycogonium hispidulum Cogn | Miconia hispidula (Cogn.) Judd, Bécquer & Majure |
| Calycogonium impressum Urb. & Ekman | Miconia impressinervis Skean & Judd |
| Calycogonium lanceolatum Griseb. | Miconia secundo-lanceolata (Griseb.) M. Gómez |
| Calycogonium lindenianum Naudin | Miconia lindeniana (Naudin) M. Gómez |
| Calycogonium maculatum Urb. & Ekman | Miconia maculata (Urb. & Ekman) Judd, Bécquer & Majure |
| Calycogonium microphyllum C.Wright | Miconia microphylla (C.Wright) M. Gómez |
| Calycogonium moanum (Borhidi & O.Muñiz) Borhidi & O.Muñiz | Miconia moana (Borhidi & O.Muñiz) Bécquer & Michelang |
| Calycogonium plicatum Griseb. | Miconia plicata (Griseb.) M. Gómez |
| Calycogonium pseudofloribundum Becquer | Miconia pseudofloribunda (Becquer) Bécquer & Michelang |
| Calycogonium reticulatum (Cogn.) Judd & Skean | Miconia reticulato-venosa Judd, Bécquer & Majure |
| Calycogonium revolutum Alain | Miconia perezii (Alain) Bécquer & Michelang |
| Calycogonium rhamnoideum Naudin | Miconia vulcanidomatia Bécquer & Skean |
| Calycogonium rhomboideum Urb. & Ekman | Miconia rhomboidea ((Urb. & Ekman)) Skean & Judd |
| Calycogonium rosmarinifolium Griseb. | Miconia rosmarinifolia (Griseb.) M. Gómez |
| Calycogonium saxicola Britton & P. Wilson | Miconia karsticola Judd, Bécquer, Skean, & Majure |
| Calycogonium squamulosum Cogn. | Henriettea squamulosa (Cogn.) Judd |
| Calycogonium susannae Borhidi | Miconia susannae (Borhidi) Bécquer & Michelang |
| Calycogonium tetragonolobum (Cogn.) Judd & Skean | Miconia tetragonoloba (Cogn.) Judd, Bécquer & Majure |
| Calycogonium torbecianum Urb. & Ekman | Miconia torbeciana ((Urb. & Ekman)) Skean & Judd |
| Calycogonium turbinatum Urb. & Ekman | Miconia turbinata ((Urb. & Ekman)) Skean & Judd |
| Catocoryne linnaeoides Hook.f. | Miconia linnaeoides (Hook. F.) Michelang. |
| Centronia brachycera (Naudin) Triana | Meriania brachycera (Naudin) Humberto Mend. & Fern. Alonso |
| Centronia crassiramis (Naudin) Triana | Meriania crassiramis (Naudin) Wurdack |
| Centronia grandiflora Standl. | Meriania grandiflora (Standl.) Almeda |
| Centronia haemantha (Planch. & Lindl.) Triana | Meriania haemantha (Planch. et Linden) Humberto Mend. & Fern. Alonso |
| Centronia mutabilis Gleason | Meriania mutabilis (Gleason) Humberto Mend. & Fern-Alonso |
| Centronia mutisii (Bonpl.) Triana | Meriania mutisii (Bonpl.) Humberto Mend. & Fern-Alonso |
| Centronia phlomoides Triana | Meriania phlomoides (Triana) Almeda |
| Charianthus alpinus (Sw.) R.A.Howard | Miconia coccinea (Rich.) Judd & Skean |
| Charianthus corymbosus (Rich.) Cogn. | Miconia corymbosa (Rich.) Judd & Skean |
| Charianthus dominicensis Penneys & Judd | Miconia dominicensis (Penneys & Judd) Penneys |
| Charianthus grenadensis Penneys & Judd | Miconia grenadensis (Penneys & Judd) Penneys |
| Charianthus nodosus (Desr.) Triana | Miconia leblondii Judd & Skean |
| Charianthus purpureus D.Don | Miconia purpurea (D.Don) Judd & Skean |
| Clidemia ablusa Wurdack | Miconia ablusa (Wurdack) Michelang. |
| Clidemia acostae Wurdack | Miconia acostae (Wurdack) Michelang. |
| Clidemia acurensis Wurdack | Miconia acurensis (Wurdack) Michelang. |
| Clidemia acutifolia Cogn. | Miconia acutilamina Michelang. |
| Clidemia aguaclarensis Wurdack | Miconia aguaclarensis (Wurdack) Michelang. |
| Clidemia aguilarii Kriebel & Almeda | Miconia aguilarii (Kriebel & Almeda) Gamba & Almeda |
| Clidemia allardii Wurdack | Miconia allardii (Wurdack) Michelang. |
| Clidemia allenii Almeda | Miconia allenii (Almeda) Almeda |
| Clidemia almedae Kriebel | Miconia almedae (Kriebel) Michelang. |
| Clidemia alternifolia Wurdack | Miconia alternilamina Michelang. |
| Clidemia ampla Cogn. | Miconia amplilamina Michelang. |
| Clidemia andersonii Wurdack | Miconia willamandersonii Michelang. |
| Clidemia anisophylla DC. | Miconia asymmetrica Michelang. |
| Clidemia anoriensis L.Uribe | Miconia anoriensis (L.Uribe) Michelang. |
| Clidemia aphanantha (Naudin) Sagot | Miconia aphanantha (Naudin) Michelang. |
| Clidemia asplundii Wurdack | Miconia erikasplundii Gamba & Almeda |
| Clidemia atrata Spring | Miconia atrata (Spring.) Wawra |
| Clidemia attenuata (Naudin) Cogn. | Miconia attenuatifolia Michelang. |
| Clidemia aurantiaca Almeda & Kriebel | Miconia aurantiaca (Almeda & Kriebel) Gamba & Almeda |
| Clidemia ayangannensis Wurdack | Miconia ayangannensis (Wurdack) Michelang. |
| Clidemia barbata Triana | Miconia barbipetiolata Michelang. |
| Clidemia barkleyi Wurdack | Miconia barkleyi (Wurdack) Michelang. |
| Clidemia bernardii Wurdack | Miconia lucianobernardii Michelang. |
| Clidemia biolleyana Cogn. | Miconia biolleyana (Cogn.) Gamba & Almeda |
| Clidemia biserrata DC. | Miconia biserrata (DC.) Michelang. |
| Clidemia bullosa DC. | Miconia bullosa (DC.) Michelang. |
| Clidemia buntingii Wurdack | Miconia georgebuntingii Michelang. |
| Clidemia calcarata Cogn. & Gleason | Miconia neocalcarata Michelang. |
| Clidemia campii Wurdack | Miconia waltercampii Michelang. |
| Clidemia capillipes (Triana) Cogn. | Miconia capillipes (Triana) Michelang. |
| Clidemia capitata Benth. | Miconia benthamii (Naudin) Michelang. |
| Clidemia capitellata (Bonpl.) D.Don | Miconia dependens (Pav. ex D. Don) Judd & Majure |
| Clidemia caudata Wurdack | Miconia caudatifolia Michelang. |
| Clidemia charadrophylla Tutin | Miconia charadrophylla (Tutin) Michelang. |
| Clidemia chocoensisWurdack | Miconia chocoensis (Wurdack) Gamba & Almeda |
| Clidemia ciliata Pav. ex D.Don | Miconia domociliata Michelang. |
| Clidemia clandestina Almeda | Miconia clandestina (Almeda) Almeda |
| Clidemia collina Gleason | Miconia formicocollina Michelang. |
| Clidemia coloradensis Almeda | Miconia neocoloradensis Almeda |
| Clidemia conglomerata DC. | Miconia conglomerata (DC) Michelang. |
| Clidemia cordata Cogn. ex Britton | Miconia neocordata Michelang. |
| Clidemia coronata Gleason | Miconia neocoronata Gamba & Almeda |
| Clidemia costaricensis Cogn. & Gleason ex Gleason | Miconia skutchiana Michelang. |
| Clidemia crenulata Gleason | Miconia crenulata (Gleason) Michelang. |
| Clidemia crossosepala Griseb. | Miconia crossosepala (Griseb.) Ionta & Judd |
| Clidemia crotonifolia Pilg. | Miconia neocrotonifolia Michelang. |
| Clidemia cruegeriana Griseb. | Miconia neocrugeriana Michelang. |
| Clidemia cuatrecasasii Wurdack | Miconia quadridomius Gamba & Almeda |
| Clidemia cursoris Wurdack | Miconia cursoris (Wurdack) Michelang. |
| Clidemia cutucuensis Wurdack | Miconia disticha Michelang. |
| Clidemia cymifera Donn. Sm. | Miconia cymifera (Donn. Sm.) Michelang. |
| Clidemia davidsei Almeda | Miconia davidsei (Almeda) Almeda |
| Clidemia debilis Crueg. | Miconia debilis (Crueg.) Michelang. |
| Clidemia densiflora (Standl.) Gleason | Miconia approximata Gamba & Almeda |
| Clidemia dentata D.Don | Miconia dentata (D. Don) Michelang. |
| Clidemia diffusa Donn. Sm. | Miconia verapazana Michelang. |
| Clidemia diguensis Wurdack | Miconia diguensis (Wurdack) Michelang. |
| Clidemia dimorphica J.F.Macbr. | Miconia dimorphica (J. F. Macbr.) Michelang. |
| Clidemia discolor (Triana) Cogn. | Miconia purpureoviolacea (Cogn.) Michelang. |
| Clidemia domingensis (DC.) Cogn. | Miconia hispaniolica Judd & Majure |
| Clidemia donnell-smithii Cogn. | Miconia mesoamericana Michelang. |
| Clidemia duidae Gleason | Miconia duidae (Gleason) Michelang. |
| Clidemia ecuadorensis Gleason | Miconia ecuadorensis (Gleason) Michelang. |
| Clidemia epibaterium DC. | Miconia epibaterium (DC) Michelang. |
| Clidemia epiphytica (Triana) Cogn. | Miconia neoepiphyitca Michelang. |
| Clidemia erythropogon DC. | Miconia erytrhopogon (DC.) Judd & Ionta |
| Clidemia evanescensAlmeda | Miconia evanescens (Almeda) Gamba & Almeda |
| Clidemia farinasii Wurdack | Miconia farinasii (Wurdack) Michelang. |
| Clidemia fausta Wurdack | Miconia fausta (Wurdack) Michelang. |
| Clidemia fendleri Cogn. | Miconia rariflora (Bonpl) Michelang. |
| Clidemia fissinervia Gleason | Miconia fissinervia (Gleason) Michelang. |
| Clidemia flexuosa (Triana) Cogn. | Miconia flexuosa (Triana) Michelang. |
| Clidemia fluminensis Baumgratz & D'El Rei Souza | Miconia pleiofluminensis R.Goldenb & Michelang. |
| Clidemia foliosa Gleason | Miconia formicofoliosa Michelang. |
| Clidemia folsomii Almeda | Miconia folsomii (Almeda) Almeda |
| Clidemia foreroi Wurdack | Miconia foreroi (Wurdack) Michelang. |
| Clidemia francavillana Cogn. | Miconia pseudodebilis Michelang. |
| Clidemia fraterna Gleason | Miconia fraterna (Gleason) Michelang. |
| Clidemia fulva Gleason | Miconia crocina Michelang. |
| Clidemia garciabarrigae Wurdack | Miconia garcia-barrigae (Wurdack) Almeda |
| Clidemia globuliflora (Cogn.) L.O.Williams | Miconia reflexa (Gleason) Michelang. |
| Clidemia graciliflora Huber | Miconia graciliflora (Huber) Michelang. |
| Clidemia gracilipes Gleason | Miconia gracilipes (Gleason) Michelang. |
| Clidemia gracilis Pittier | Miconia pseudoalternifolia Michelang. |
| Clidemia grandifolia Cogn. | Miconia badilloi Michelang. |
| Clidemia granvillei Wurdack | Miconia granvillei (Wurdack) Michelang. |
| Clidemia grisebachii Cogn. | Miconia augustgrisebachii Ionta & Judd |
| Clidemia guadaloupensis (DC) Griseb. | Miconia guadalupensis (DC.) Judd, Ionta, & Majure |
| Clidemia hammelii Almeda | Miconia hammelii (Almeda) Almeda |
| Clidemia heptamera Wurdack | Miconia heptamera (Wurdack) Michelang. |
| Clidemia heteronervis (Naudin) Wurdack | Miconia heteronervis (Naudin) Michelang. |
| Clidemia heteroneura (Schrank & Mart. ex DC.) Cogn. | Miconia heteroneura (Schrank. et Mart. ex DC.) Michelang. |
| Clidemia heterophylla (Desr.) Gleason | Miconia formicoheterophylla Michelang. |
| Clidemia hirta (L.) D.Don | Miconia crenata (Vahl.) Michelang. |
| Clidemia imparilis Wurdack | Miconia imparilis (Wurdack) Michelang. |
| Clidemia inobsepta Wurdack | Miconia inobsepta (Wurdack) Michelang. |
| Clidemia inopinata Almeda | Miconia inopinata (Almeda) Almeda |
| Clidemia inopogon Mart. | Miconia ionopogon (DC) Goldenberg |
| Clidemia intonsa E.Cotton & W.Meier | Miconia intonsa (E.Cotton & W.Meier) Michelang. |
| Clidemia involucrata DC. | Miconia cephaloides Michelang. |
| Clidemia japurensis DC. | Miconia heteroclita (Naudin) Michelang. |
| Clidemia juruensis (Pilg.) Gleason | Miconia formicojuruensis Michelang. |
| Clidemia kappleri Cogn. | Miconia augustkappleri Michelang. |
| Clidemia killipii Gleason | Miconia ellsworthii Michelang. |
| Clidemia laevifolia Gleason | Miconia laevifolia (Gleason) Michelang. |
| Clidemia lanuginosa Almeda | Miconia neolanuginosa Almeda |
| Clidemia laxiflora (Schltdl.) Walp. ex Naudin | Miconia laxiflora (Schltdl.) Michelang. |
| Clidemia leucandra C.Wright ex Griseb. | Miconia leucandra (C.Wright ex Griseb.) Judd & Ionta |
| Clidemia leucandra var. divaricata C.Wright ex Griseb. | Miconia divaricatiflora Judd & Becquer |
| Clidemia linearis (Gleason) Wurdack | Miconia linearis (Gleason) Michelang. |
| Clidemia longifolia Gleason | Miconia adventitia Michelang. |
| Clidemia longipedunculata E.Cotton | Miconia cottoniana Michelang. |
| Clidemia macropetala R.O. Williams | Miconia macropetala Michelang. |
| Clidemia marahuacensis Wurdack | Miconia marahuacencis (Wurdack) Michelang. |
| Clidemia matudae L.O.Williams | Miconia matudae (L. O. Wms.) Michelang. |
| Clidemia micrantha Sagot | Miconia drosera (Sagot) Michelang. |
| Clidemia microthyrsa R.O.Williams | Miconia microthyrsa (L.O.Wms.) Michelang. |
| Clidemia monantha L.O.Williams | Miconia monantha (L. O. Wms.) Michelang. |
| Clidemia morichensis Wurdack | Miconia morichensis (Wurdack) Michelang. |
| Clidemia mortoniana Standl. | Miconia mortoniana (Standl.) Michelang. |
| Clidemia myrmecina Gleason | Miconia myrmecina (Gleason) Michelang. |
| Clidemia neblinae Wurdack | Miconia neblinae (Wurdack) Michelang. |
| Clidemia novemnervia (DC.) Triana | Miconia bullatifolia Michelang. |
| Clidemia obliqua Griseb. ex Cogn. | Miconia alaticualis Michelang. |
| Clidemia oblonga Gleason | Miconia oblonga (Gleason) Michelang. |
| Clidemia octona (Bonpl.) L.O.Williams | Miconia octona (Bonpl.) Judd & Majure |
| Clidemia ombrophila Gleason | Miconia silviphila Michelang. |
| Clidemia ostentata Wurdack | Miconia ostentata (Wurdack) Michelang. |
| Clidemia ostrina Gleason | Miconia ostrina (Gleason) Michelang. |
| Clidemia oxyura (Naudin) Triana | Miconia oxyura (Naudin) Michelang. |
| Clidemia pakaraimae Wurdack | Miconia pakaraimae (Wurdack) Michelang. |
| Clidemia pectinata Almeda | Miconia neopectinata Almeda |
| Clidemia petiolaris (Schltdl. & Cham.) Schltdl. ex Triana | Miconia petiolaris (Schltdl. & Cham.) Michelang. |
| Clidemia petiolata DC. | Miconia petiolata (DC.) Michelang. |
| Clidemia pilosa Pav. ex D.Don | Miconia neopilosa Michelang. |
| Clidemia piperifolia Gleason | Miconia piperilamina Michelang. |
| Clidemia plumosa (Desr.) DC. | Miconia berteroi (DC) Judd & Ionta |
| Clidemia pterosepala (Urb.) Alain | Miconia pterosepala Urb. |
| Clidemia pubescens Gleason | Miconia pubescens (Gleason) Michelang. |
| Clidemia purpurea Pav. ex Don | Miconia atropurpurea Gamba & Almeda |
| Clidemia pustulata DC. | Miconia fenestrata (Seem.) Michelang. |
| Clidemia pycnantha Urb. & Ekman | Miconia pycnantha (Urb. & Ekman) Ionta, Judd & Skean |
| Clidemia pycnaster Tutin | Miconia pycnaster (Tutin) Michelang. |
| Clidemia quinquenervia (Mill.) Almeda | Miconia quinquenervia (Mill.) Gamba & Almeda |
| Clidemia radicans Cogn. | Miconia radicans (Cogn.) Gamba & Almeda |
| Clidemia reitziana Cogn. & Gleason ex Gleason | Miconia reitziana (Cogn. & Gleason ex Gleason) Gamba & Almeda |
| Clidemia repens Triana | Miconia repens (Triana) Michelang. |
| Clidemia retropila DC | Miconia retropila (DC.) Ocampo & Almeda |
| Clidemia rodriguezii Almeda | Miconia rodriguezii (Almeda) Almeda |
| Clidemia rubra (Aubl.) Mart. | Miconia rubra (Aubl.) Mabb. |
| Clidemia rubrinervis (Naudin) Cogn. | Miconia rubrinervis (Naudin) Judd & Becquer |
| Clidemia rubripila Cogn. | Miconia rubripila (Cogn.) Judd & Ionta |
| Clidemia ruddae Wurdack | Miconia ruddae (Wurdack) Michelang. |
| Clidemia saltuensis Wurdack | Miconia chichirivichensis Michelang. |
| Clidemia sandwithii Wurdack | Miconia sandwithii (Wurdack) Michelang. |
| Clidemia saulensis Wurdack | Miconia saulensis (Wurdack) Michelang. |
| Clidemia scalpta (Vent.) F. S. Axelrod | Miconia scalpta (Vent.) Ionta, Judd & Skean |
| Clidemia scopulina (Brandegee) L.O.Williams | Miconia scopulina (Brand.) Michelang. |
| Clidemia semijuga (Gleason) Wurdack | Miconia semijuga (Gleason) Michelang. |
| Clidemia septuplinervia Cogn. | Miconia trichocalyx (Pittier) Michelang. & Judd |
| Clidemia sericea D.Don | Miconia sericea (D. Don) Michelang. |
| Clidemia serpens (Triana) Cogn. | Miconia serpens (Triana) Michelang. |
| Clidemia sessiliflora (Naudin) Cogn. | Miconia sessiliflora (Naudin) Michelang. |
| Clidemia setosa (Triana) Gleason | Miconia formicosetosa Michelang. |
| Clidemia siapensis Wurdack | Miconia siapensis (Wurdack) Michelang. |
| Clidemia silvicola Gleason | Miconia silvicola (Gleason) Michelang. |
| Clidemia simpsonii Wurdack | Miconia simpsonii (Wurdack) Michelang. |
| Clidemia smithii Gleason | Miconia albertsmithii Michelang. |
| Clidemia spectabilis Gleason | Miconia spectabilis (Gleason) Michelang. |
| Clidemia sprucei Gleason | Miconia richardsprucei Michelang. |
| Clidemia stellipilis (Gleason) Wurdack | Miconia sororopana Michelang. |
| Clidemia steyermarkii Wurdack | Miconia julianii Michelang. |
| Clidemia strigillosa (Sw.) DC. | Miconia strigillosa (Sw.) Judd & Ionta |
| Clidemia submontana Rose ex Gleason | Miconia submontana (Rose ex Gleason) Michelang. |
| Clidemia subpeltata Kriebel & Almeda | Miconia subpeltata (Kriebel & Almeda) Almeda |
| Clidemia swartzii Griseb. | Miconia pilosa (Sw) Judd & Ionta |
| Clidemia taurina Gleason | Miconia taurina (Gleason) Michelang. |
| Clidemia tenebrosa Almeda | Miconia tenebrosa (Almeda) Almeda |
| Clidemia tepuiensis Wurdack | Miconia nebulensis Michelang. |
| Clidemia tetrapetala Almeda | Miconia tetrapetala (Almeda) Almeda |
| Clidemia tetraptera Cogn. | Miconia tetraptera (Cogn.) Ionta, Judd & Skean |
| Clidemia tillettii Wurdack | Miconia stephentillettii Michelang. |
| Clidemia tococoidea (DC.) Gleason | Miconia tococoidea (Gleason) Michelang. |
| Clidemia trichosantha Almeda | Miconia trichosantha (Almeda) Almeda |
| Clidemia trichotoma C.Wright ex Griseb. | Miconia hirticalyx Judd & Becquer |
| Clidemia trinitensis (Crueg.) Griseb. | Miconia trinitensis (Crueg) Michelang. |
| Clidemia tuerckheimii (Donn. Sm.) Gleason | Miconia hanstuerckheimii Michelang. |
| Clidemia ulei Pilg. | Miconia ernstulei Michelang. |
| Clidemia umbrosa (Sw.) Cogn. | Miconia sciaphila Judd & Ionta |
| Clidemia urceolata DC. | Miconia neourceolata Michelang. |
| Clidemia uribei Wurdack | Miconia lorenzouribei Michelang. |
| Clidemia urticoides Pilg. | Miconia urticilamina Michelang. |
| Clidemia utleyana Almeda | Miconia utleyana (Almeda) Almeda |
| Clidemia vallicola Gleason | Miconia vallicola (Gleason) Michelang. |
| Clidemia variifolia Wurdack | Miconia variifolia (Wurdack) Michelang. |
| Clidemia vegaensis Cogn. | Miconia vegaensis (Cogn.) Judd, Bécquer & Majure |
| Clidemia venosa (Gleason) Wurdack | Miconia venosa (Gleason) Michelang. |
| Clidemia ventricosa Almeda | Miconia ventricosa (Almeda) Almeda |
| Clidemia verruculosa Wurdack | Miconia verruculosa (Wurdack) P.Jørg. & C.Ulloa |
| Comolia ayangannae Wurdack | Acisanthera ayangannae (Wurdack)M.J.R.Rocha&P.J.F.Guim., |
| Comolia coriacea Gleason | Comoliopsis coriacea (Gleason) M.J.R.Rocha & P.J.F.Guim. |
| Comolia edmundoi Brade | Fritzschia edmundoi (Brade) M.J.R.Rocha & P.J.F.Guim. |
| Comolia lanceiflora (DC.) Triana | Fritzschia lanceiflora (DC.) M.J.R.Rocha & P.J.F.Guim. |
| Comolia montana Gleason | Comoliopsis montana (Gleason) M.J.R.Rocha & P.J.F.Guim. |
| Comolia sertularia (DC.) Triana | Fritzschia sertularia (DC.) M.J.R.Rocha & P.J.F.Guim. |
| Comolia sessilis (Spreng.) Triana | Fritzschia sessilis (Spreng.) M.J.R.Rocha & P.J.F.Guim. |
| Comolia stenodon Triana | Fritzschia stenodon (Triana) M.J.R.Rocha & P.J.F.Guim. |
| Comolia vernicosa (Benth.) Triana | Leiostegia vernicosa Benth. |
| Conostegia apiculata Wurdack | Miconia conoapiculata Michelang. |
| Conostegia arborea (Schltdl.) Steud. | Miconia galeottii (Naudin) Michelang. |
| Conostegia attenuata Triana | Miconia conoattenuata Michelang. |
| Conostegia balbisiana Ser. ex DC. | Miconia balbisiana (Ser. ex Dc.) Michelang. |
| Conostegia bigibbosa Cogn. | Miconia bigibbosa (Cogn.) Michelang. |
| Conostegia bracteata Triana | Miconia conobracteata Michelang. |
| Conostegia brenesii Standl. | Miconia conobrenesii Michelang. |
| Conostegia caelestis Standl. | Miconia caelestis (Standl.) Michelang. |
| Conostegia centronioides Markgr. | Miconia conocentronioides Michelang. |
| Conostegia centronioides var. lancifolia Markgr. | Miconia conolancifolia Michelang. |
| Conostegia chiriquensis Gleason | Miconia conochiriquensis Michelang. |
| Conostegia cinnamomea (Beurl.) Wurdack | Miconia cinnamomea Beurl. |
| Conostegia cuatrecasii Gleason | Miconia conocuatrecasii Michelang. |
| Conostegia dentata Triana | Miconia conodentata Michelang. |
| Conostegia extinctoria (Bonpl.) D.Don ex DC. | Miconia extinctoria (Bonpl.) Michelang. |
| Conostegia fragrantissima Almeda | Miconia fragrantissima (Almeda) Michelang. & Almeda |
| Conostegia hirtella Cogn. | Miconia conohirtella Michelang. |
| Conostegia icosandra (Sw. ex Wikstr.) Urb. | Miconia subhirsuta (DC.) M. Gomez |
| Conostegia inusitata Wurdack | Miconia inusitata (Wurdack) Michelang. & R. Goldenb. |
| Conostegia jaliscana Standl. | Miconia jaliscana (Standl.) Michelang. |
| Conostegia lasiopoda Benth. | Miconia lasiopoda (Benth.) Michelang. |
| Conostegia lindenii Cogn. | Miconia lomensis (Urb.) Michelang. |
| Conostegia macrantha O.Berg ex Triana | Miconia conomacrantha Michelang. |
| Conostegia micrantha Standl. | Miconia conomicrantha Michelang. |
| Conostegia montana (Sw.) D.Don ex DC. | Miconia cooperi (Cogn) Michelang. |
| Conostegia monteleagreana Cogn. | Miconia monteleagreana (Cogn) Michelang. |
| Conostegia muriculata Almeda | Miconia muriculata (Almeda) Michelang. & Almeda |
| Conostegia oerstediana O.Berg ex Triana | Miconia oerstediana (O. Berg ex Triana) Michelang. |
| Conostegia ortizae Kriebel | Miconia ortizae (Kriebel) Michelang. |
| Conostegia pittieri Cogn. | Miconia durandii Michelang. & P.Jørg |
| Conostegia pittieri Cogn. ex T.Durand | Miconia donnell-smithii (Cogn.) Michelang. |
| Conostegia plumosa L.O.Williams | Miconia conoplumosa Michelang. |
| Conostegia polyandra Benth. | Miconia rupicola Gleason |
| Conostegia procera (Sw.) D.Don | Miconia gloriosa (Macfad) Michelang. |
| Conostegia pyxidata Proctor | Miconia pyxidata (Proctor) Michelang. |
| Conostegia rhodopetala Donn. Sm. | Miconia rhodopetala (Donn-Sm.) Michelang. |
| Conostegia rubiginosa Gleason | Miconia conorubiginosa Michelang. |
| Conostegia rufescens Naudin | Miconia conorufescens Michelang. |
| Conostegia setifera Standl. | Miconia conosetifera Michelang. |
| Conostegia setosa Triana | Miconia conosetosa Michelang. |
| Conostegia speciosa Naudin | Miconia conospeciosa Michelang. |
| Conostegia subcrustulata (Beurl.) Triana | Miconia subcrustulata Beurl. |
| Conostegia superba Naudin | Miconia baillonii M. Gomez |
| Conostegia tenuifolia Donn. Sm. | Miconia tenuifolia (Donn. Sm.) Michelang. |
| Conostegia volcanalis Standl. & Steyerm. | Miconia volcanalis (Standl. & Steyerm.) Michelang. |
| Conostegia vulcanicola Donn. Sm. | Miconia vulcanicola (Donn. Sm.) Michelang. |
| Conostegia xalapensis (Bonpl.) D.Don ex DC. | Miconia xalapensis (Bonpl.) M. Gomez |
| Diolena agrimonioides Triana | Triolena agrimonioides (Triana) Almeda & Alvear |
| Diolena allardii Wurdack | Triolena allardii (Wurdack) Wurdack |
| Diolena amazonica Pilg. | Triolena amazonica (Pilg.) Wurdack |
| Diolena auriculata Triana | Triolena auriculata (Triana) Almeda & Alvear |
| Diolena calciphila Standl. & Steyerm. | Triolena calciphila (Standl. & Steyerm.) Standl. & L.O.Williams |
| Diolena campii Wurdack | Triolena campii (Wurdack) Wurdack |
| Diolena hygrophylla Naudin | Triolena hygrophylla (Naudin) L.O.Williams |
| Diolena lanceolata Gleason | Triolena lanceolata (Gleason) Almeda & Alvear |
| Diolena obliqua Triana | Triolena obliqua (Triana) Wurdack |
| Diolena pileoides Triana | Triolena pileoides (Triana) Wurdack |
| Diolena pluvialis Wurdack | Triolena pluvialis (Wurdack) Wurdack |
| Diolena purpurea Gleason | Triolena purpurea (Gleason) Almeda & Alvear |
| Diolena spicata Triana | Triolena spicata (Triana) L.O.Williams |
| Diolena stenophylla Standl. & Steyerm. | Triolena stenophylla (Standl. & Steyerm.) Standl. & L.O.Williams |
| Diplarpea paleacea Triana | Triolena paleacea (Triana) Almeda & Alvear, |
| Dolichoura kollmannii R. Goldenb. & R. Tavares | Huberia kollmannii (R.Goldenb. & R.Tav.) Bochorny & Michelang. |
| Dolichoura spiritusanctensis Brade | Huberia bradeana Bochorny & R.Goldenb. |
| Ernestia cordifolia O. Berg ex Triana | Pseudoernestia cordifolia (O.Berg ex Triana) Krasser |
| Ernestia glandulosa Gleason | Pseudoernestia glandulosa (Gleason) M.J.R.Rocha & P.J.F.Guim. |
| Ernestia pullei Gleason | Appendicularia pullei (Gleason) M.J.R.Rocha & P.J.F.Guim |
| Ernestia subglabra Wurdack | Appendicularia subglabra (Wurdack) M.J.R.Rocha & P.J.F.Guim. |
| Henriettea hotteana (Urb. & Ekman) Alain | Miconia hotteana (Urb. & Ekman) Judd & Ionta |
| Henriettea hotteana (Urb. & Ekman) Alain | Miconia hotteana (Urb. & Ekman) Judd & Ionta |
| Henriettella acunae Alain | Henriettea acunae (Alain) Alain |
| Henriettella aggregata (D.Don) Triana | Henriettea aggregata (D.Don) J.F.Macbr. |
| Henriettella barkeri Urb. & Ekman | Henriettea barkeri (Urb. & Ekman) Alain |
| Henriettella boliviensis Cogn. | Henriettea boliviensis (Cogn.) Penneys, Michelangeli, Judd & Almeda |
| Henriettella bracteosa Wurdack | Henriettea bracteosa (Wurdack) Penneys, Michelangeli, Judd & Almeda |
| Henriettella caudata Gleason | Henriettea caudata (Gleason) Penneys, Michelangeli, Judd & Almeda |
| Henriettella ciliata Urb. & Ekman | Henriettea ciliata (Urb. & Ekman) Alain |
| Henriettella cuabae (Urb.) Bisse | Henriettea cuabae (Urb.) Borhidi |
| Henriettella cuneata (Standl.) Gleason | Henriettea cuneata (Standl.) L.O.Williams |
| Henriettella duckeana Hoehne | Henriettea duckeana (Hoehne) Penneys, Michelangeli, Judd & Almeda |
| Henriettella ekmanii Urb. | Henriettea ekmanii (Urb.) Alain |
| Henriettella fascicularis (Sw.) C.Wright | Henriettea fascicularis (Sw.) M.Gómez |
| Henriettella fissanthera Gleason | Henriettea fissanthera (Gleason) Penneys, Michelangeli, Judd & Almeda |
| Henriettella flavescens (Aubl.) Triana | Henriettea flavescens (Aubl.) Baill. |
| Henriettella gibberosa Urb. | Henriettea gibberosa (Urb.) Alain |
| Henriettella glabra (Vell.) Cogn. | Henriettea glabra (Vell.) Penneys, Michelangeli, Judd & Almeda |
| Henriettella goudotiana Naudin | Henriettea goudotiana (Naudin) Penneys, Michelangeli, Judd & Almeda |
| Henriettella heteroneura Gleason | Henriettea heteroneura (Gleason) Penneys, Michelangeli, Judd & Almeda |
| Henriettella hondurensis Wurdack | Henriettea hondurensis (Wurdack) Penneys, Michelangeli, Judd & Almeda |
| Henriettella ininiensis Wurdack | Henriettea ininiensis (Wurdack) Penneys, Michelangeli, Judd & Almeda |
| Henriettella lateriflora (Vahl) Triana | Henriettea lateriflora (Vahl) R.A.Howard & E.A.Kellogg |
| Henriettella lawrencei Gleason | Henriettea lawrancei (Gleason) Penneys, Michelangeli, Judd & Almeda |
| Henriettella loretensis Gleason | Henriettea loretensis (Gleason) J.F.Macbr. |
| Henriettella lundellii Wurdack | Henriettea lundellii (Wurdack) Penneys, Michelangeli, Judd & Almeda |
| Henriettella macfadyenii Triana | Henriettea macfadyenii (Triana) Alain |
| Henriettella maguirei Wurdack | Henriettea maguirei (Wurdack) Penneys, Michelangeli, Judd & Almeda |
| Henriettella manarae Wurdack | Henriettea manarae (Wurdack) Penneys, Michelangeli, Judd & Almeda |
| Henriettella megaloclada Urb. & Ekman | Henriettea megaloclada (Urb. & Ekman) Alain |
| Henriettella membranifolia Cogn. | Henriettea membranifolia (Cogn.) Alain |
| Henriettella odorata Markgr. | Henriettea odorata (Markgr.) Penneys, Michelangeli, Judd & Almeda |
| Henriettella ovata Cogn. | Henriettea ovata (Cogn.) Penneys, Michelangeli, Judd & Almeda |
| Henriettella prancei Wurdack | Henriettea prancei (Wurdack) Penneys, Michelangeli, Judd & Almeda |
| Henriettella reflexa Urb. & Ekman | Henriettea reflexa (Urb. & Ekman) Alain |
| Henriettella rimosa Wurdack | Henriettea rimosa (Wurdack) Penneys, Michelangeli, Judd & Almeda |
| Henriettella seemannii Naudin | Henriettea seemannii (Naudin) L.O.Williams |
| Henriettella sessilifolia (L.) Triana | Henriettea sessilifolia (L.) Alain |
| Henriettella squamata Alain | Henriettea squamata (Alain) Alain |
| Henriettella steyermarkii Wurdack | Henriettea steyermarkii (Wurdack) Penneys, Michelangeli, Judd & Almeda |
| Henriettella sylvestris Gleason | Henriettea sylvestris (Gleason) J.F.Macbr. |
| Henriettella tachirensis Wurdack | Henriettea tachirensis (Wurdack) Penneys, Michelangeli, Judd & Almeda |
| Henriettella tobagensis Wurdack | Henriettea tobagensis (Wurdack) Penneys, Michelangeli, Judd & Almeda |
| Henriettella tovarensis Cogn. | Henriettea tovarensis (Wurdack) Penneys, Michelangeli, Judd & Almeda |
| Henriettella trachyphylla Triana | Henriettea trachyphylla (Triana) Penneys, Michelangeli, Judd & Almeda |
| Henriettella triflora (Vahl) Triana | Henriettea triflora (Vahl) Alain |
| Henriettella tuberculosa Donn. Sm. | Henriettea tuberculosa (Donn. Sm.) L.O.Williams |
| Henriettella verrucosa Triana | Henriettea verrucosa (Triana) J.F.Macbr. |
| Huilaea calyptrata Penneys & Morales-P. | Chalybea calyptrata (Penneys & Morales-P.) Penneys & Morales-P., |
| Huilaea ecuadorensis Wurdack | Chalybea ecuadorensis (Wurdack) Morales-P. & Penneys |
| Huilaea kirkbridei Wurdack | Chalybea kirkbridei (Wurdack) Morales-P. & Penneys |
| Huilaea macrocarpa L.Uribe | Chalybea macrocarpa (L.Uribe) Morales-P. & Penneys |
| Huilaea minor (L.Uribe) Lozano & N.Ruiz-R. | Chalybea minor (L.Uribe) Morales-P. & Penneys |
| Huilaea mutisiana L.Uribe | Chalybea mutisiana L.Uribe) Morales-P. & Penneys |
| Huilaea occidentalis Lozano & N.Ruiz-R. | Chalybea occidentalis Lozano & N.Ruiz-R) Morales-P. & Penneys. |
| Huilaea penduliflora Wurdack | Chalybea penduliflora Wurdack) Morales-P. & Penneys |
| Killipia latifolia Wurdack | Miconia jamesluteynii Michelang. |
| Killipia pedunculata Gleason | Miconia aurantipetala Michelang. |
| Killipia quadrangularis Gleason | Miconia quadricaulis Michelang. |
| Killipia rotundifolia Wurdack | Miconia roseopetala Michelang. |
| Killipia verticalis N.Ruiz-R. | Miconia verticalis (N. Ruiz-R.) Michelang. |
| Leandra acuminata Cogn. | Miconia leacuminata R.Goldenb. |
| Leandra acutiflora (Naudin) Cogn. | Miconia acutiflora (Naudin) R.Goldenb. |
| Leandra adamantinensis Brade | Miconia adamantinensis (Brade) R.Goldenb. |
| Leandra adenothrix Cogn. | Miconia adenothrix (Cogn.) R.Goldenb. |
| Leandra agrestis (Aubl.) Raddi | Miconia agrestis (Aubl. ) Raddi |
| Leandra alpestris (Gardn.) Cogn. | Miconia lealpestris R.Goldenb. |
| Leandra altomacaensis Baumgratz & D'El Rei Souza | Miconia altomacaensis (Baumgratz & D'El Rei Souza) R.Goldenb. |
| Leandra amplexicaulis DC. | Miconia pectinata (Cogn.) R.Goldenb. |
| Leandra aptera (DC.) Cogn. | Miconia aptera (DC.) R.Goldenb. |
| Leandra aristigera (Naudin) Cogn. | Miconia aristigera (Naudin) R.Goldenb. & Michelang. |
| Leandra aspera Cogn. | Miconia aspera (Cogn.) R.Goldenb. |
| Leandra atrata Cogn. | Miconia leatrata R.Goldenb. |
| Leandra atroviridis Cogn. | Miconia atroviridis (Cogn.) R.Goldenb. |
| Leandra aurea (Cham.) Cogn. | Miconia auricoma (Spring. ex Mart.) R.Goldenb. |
| Leandra australis (Cham.) Cogn. | Miconia australis (Cham.) R.Goldenb. |
| Leandra balansaei Cogn. | Miconia balansae (Cogn.) R.Goldenb. |
| Leandra barbinervis (Cham. ex Triana) Cogn. | Miconia trauninensis (Cogn.) R.Goldenb. |
| Leandra blanchetiana (Triana) Cogn. | Miconia leablanchetiana R.Goldenb. |
| Leandra boissieriana Cogn. | Miconia pierreboissieriana R.Goldenb. |
| Leandra boliviensis Cogn. | Miconia yungasensis R.Goldenb. & Michelang. |
| Leandra brackenridgei (A. Gray) Cogn. | Miconia brackenridgei (A.Gray) R.Goldenb. |
| Leandra breviflora Cogn. | Miconia breviflora (Cogn.) R.Goldenb. |
| Leandra calvescens (O. Berg ex Triana) Cogn. | Miconia leacalvescens R.Goldenb. |
| Leandra camporum Brade | Miconia camporum (Brade) R.Goldenb. |
| Leandra cancellata Cogn. | Miconia cancellata (Cogn.) R.Goldenb. |
| Leandra candelabrum (J.F.Macbr.) Wurdack | Miconia candelabrum (J.F.Macbr.) R.Goldenb. & Michelang. |
| Leandra capilliflora (Naudin) Reginato | Miconia capilliflora (Naudin) R.Goldenb. |
| Leandra capitata Reginato | Miconia leacapitata R.Goldenb. |
| Leandra caquetana Sprague | Miconia secuncaquetana G. Ocampo & Almeda |
| Leandra caquetensis Gleason | Miconia caquetensis (Gleason) G. Ocampo & Almeda |
| Leandra carassana (DC.) Cogn. | Miconia sublanata (Cogn.) R.Goldenb. |
| Leandra catharinensis Cogn. | Miconia catharinensis (Cogn.) R.Goldenb. |
| Leandra chaetocalyx (A.Gray) Cogn | Miconia chaetocalyx (A.Gray) R.Goldenb. |
| Leandra chaetodon (DC.) Cogn. | Miconia chaetodonta R.Goldenb. & Michelang. |
| Leandra cinerea (Griseb.) Cogn. | Miconia cubacinerea Majure & Judd |
| Leandra circumscissa Cogn. | Miconia circumscissa (Cogn.) R.Goldenb. |
| Leandra clidemioides (Naudin) Wurdack | Miconia stenopetala Griseb. |
| Leandra coadunata Wurdack | Miconia coadunata (Wurdack) R.Goldenb. |
| Leandra cogniauxii (D'El Rei Souza) Reginato | Miconia cogniauxii (Glaz. Ex. Del Rei Souza) R.Goldenb. |
| Leandra collina Wurdack | Miconia leacollina R.Goldenb. |
| Leandra confusa Cogn. | Miconia leaconfusa R.Goldenb. |
| Leandra cordifolia (Naud.) Cogn. | Miconia leacordifolia R.Goldenb. |
| Leandra cordigera (Triana) Cogn. | Miconia cordigera (Triana) R.Goldenb. |
| Leandra coriacea Cogn. | Miconia leacoriacea R.Goldenb. |
| Leandra cornoides (Schltdl. & Cham.) Cogn. | Miconia cornoides (Schltdl. & Cham.) Almeda |
| Leandra cremersii Wurdack | Miconia cremersii (Wurdack) G. Ocampo & Almeda |
| Leandra crenata (Pav. ex D.Don) Cogn. | Miconia leacrenata R.Goldenb. & Michelang. |
| Leandra cristata Reginato & R. Goldenb. | Miconia cristata (Reginato & R.Goldenb.) R.Goldenb. |
| Leandra cuatrecasasii Wurdack | Miconia josecuatrecasasii R.Goldenb. & Michelang. |
| Leandra cuneata (Mart.) Cogn. | Miconia cuneatissima R.Goldenb. & Michelang. |
| Leandra debilis (Naudin) Cogn. | Miconia leadebilis R.Goldenb. |
| Leandra deflexa (O. Berg. ex Triana) Cogn. | Miconia deflexa (Triana) R.Goldenb. |
| Leandra dendroides (Naudin) Cogn. | Miconia dendroides (Naudin) R.Goldenb. |
| Leandra dentata Cogn. | Miconia leadentata R.Goldenb. |
| Leandra dichotoma (Pav. ex D.Don) Cogn. | Miconia sulcicaulis (Poepp. ex Naudin) G. Ocampo & Almeda |
| Leandra diffusa Cogn. | Miconia diffusa (Cogn.) R.Goldenb. |
| Leandra dispar (Gardner) Cogn. | Miconia leadispar R.Goldenb. |
| Leandra divaricata (Naudin) Cogn. | Miconia secundivaricata G. Ocampo & Almeda |
| Leandra dolichantha (Naudin) Cogn. | Miconia dolichantha (Naudin) R.Goldenb. |
| Leandra dubia DC. | Miconia dubia (DC.) R.Goldenb. |
| Leandra echinata Cogn. | Miconia leaechinata R.Goldenb. |
| Leandra edentula Gleason | Miconia edentula (Gleason) Michelang. & R.Goldenb. |
| Leandra eichleri Cogn. | Miconia leaeichleri Michelang. & R.Goldenb. |
| Leandra eriocalyx Cogn. | Miconia leaeriocalyx R.Goldenb. |
| Leandra erostrata (DC.) Cogn. | Miconia erostrata (DC.) R.Goldenb. |
| Leandra fallacissima Markgr. | Miconia fallacissima (Markgr) R.Goldenb. |
| Leandra fallax (Cham.) Cogn. | Miconia leafallax R.Goldenb. |
| Leandra fastigiata Cogn. | Miconia fastigiata (Cogn.) R.Goldenb. |
| Leandra flavescens Cogn. | Miconia leaflavescens R.Goldenb. |
| Leandra floribunda (Naudin) Cogn. | Miconia leafloribunda R.Goldenb. |
| Leandra fluminensis Cogn. | Miconia leafluminensis R.Goldenb. |
| Leandra fontanae Reginato & R. Goldenb. | Miconia fontanae (Reginato & R. Goldenb.) R.Goldenb. |
| Leandra foveolata (DC.) Cogn. | Miconia leafoveolata R.Goldenb. |
| Leandra francavillana Cogn. | Miconia secunfrancavillana G. Ocampo & Almeda |
| Leandra freyreissii Cogn. | Miconia freyreissii (Cogn.) R.Goldenb. |
| Leandra glabrata (Bunb.) Cogn. | Miconia dolichostachya (Naudin) R.Goldenb. |
| Leandra glandulifera (Triana) Cogn. | Miconia glanduliflora R.Goldenb. & Michelang. |
| Leandra glazioviana Cogn. | Miconia pubistyla (Wurdack) R.Goldenb. |
| Leandra gorzulae Wurdack | Miconia gorzulae (Wurdack) Michelang. & R.Goldenb. |
| Leandra gracilis Cogn. | Miconia leagracilis R.Goldenb. |
| Leandra granatensis Gleason | Miconia granatensis (Gleason) G. Ocampo & Almeda |
| Leandra grandifolia Cogn. | Miconia secungrandifolia G. Ocampo & Almeda |
| Leandra grayana Cogn. | Miconia leagrayana R.Goldenb. |
| Leandra gynoverrucosa Reginato | Miconia gynoverrucosa (Reginato) R.Goldenb. |
| Leandra hatschbachii Brade | Miconia hatschbachii (Brade) R.Goldenb. |
| Leandra herincquiana Cogn. | Miconia herincquiana (Cogn.) R.Goldenb. |
| Leandra hermogenesii Baumgratz & D'El Rei Souza | Miconia hermogenesii (Baumgratz & D'El Rei Souza) Goldenberg |
| Leandra heteroporata Reginato | Miconia heteroporata (Reginato) R.Goldenb. |
| Leandra hirtella Cogn. | Miconia leahirtaella R.Goldenb. |
| Leandra horrida Cogn. | Miconia horrida (Cogn.) R.Goldenb. |
| Leandra humilis (Cogn.) Wurdack | Miconia leahumilis R.Goldenb. |
| Leandra hybophylla (Urb.) Alain | Miconia hybophylla (Urb.) Majure & Judd |
| Leandra inaequalifolia (DC) Cogn. | Miconia inaequalis R.Goldenb. & Michelang. |
| Leandra inaequidens (Urb. & Ekm.) Judd & Skean | Miconia inaequipetiolata Majure & Judd |
| Leandra intermedia (DC) Cogn. | Miconia intermedia (DC.) G. Ocampo & Almeda |
| Leandra ionopogon (Mart.) Cogn. | Miconia ionopogon (Mart.) R.Goldenb. |
| Leandra itatiaiae (Wawra) Cogn. | Miconia itatiaiae (Wawra) R.Goldenb. |
| Leandra kleinii Brade | Miconia leakleinii R.Goldenb. |
| Leandra krugiana (Cogn.) Judd & Skean | Miconia krugiana (Cogn.) Majure & Judd |
| Leandra krugii (Cogn.) Judd & Skean | Miconia karlkrugii Majure & Judd |
| Leandra lacunosa Cogn. | Miconia lacunosa (Cogn.) R.Goldenb. |
| Leandra laevigata (Triana) Cogn. | Miconia ciliolata (Cogn.) R.Goldenb. |
| Leandra lancifolia Cogn. | Miconia lealancifolia R.Goldenb. |
| Leandra lapae D'El Rei Souza & Baumgratz | Miconia lapae (D'El Rei Souza & Baumgratz) R.Goldenb. |
| Leandra lasiopetala Cogn. | Miconia lasiopetala (Cogn. ) Almeda |
| Leandra lasiostachya Cogn. | Miconia lasiostachya (Cogn.) R.Goldenb. |
| Leandra lehmanni Cogn. | Miconia friedrichlehmanni R.Goldenb. |
| Leandra lima (Desr.) Judd & Skean | Miconia lima (Desr.) M. Gómez |
| Leandra limbata Cogn. | Miconia limbata (Cogn.) R.Goldenb. |
| Leandra limoides (Urb.) Judd & Skean | Miconia limoides (Urb.) Majure & Judd |
| Leandra lindeniana (Naudin) Cogn. | Miconia lealindeniana Michelang. & R.Goldenb. |
| Leandra loligomorpha (R.Goldenb. & Reginato) Reginato | Miconia loligomorpha (R.Goldenb. & Reginato) R.Goldenb. |
| Leandra longibarbis (Schrank & Mart. ex DC.) Cogn. | Miconia longibarbis (Schrank & Mart. ex DC.) R.Goldenb. |
| Leandra longicoma Cogn. | Miconia longicoma (Cogn. ) G. Ocampo & Almeda |
| Leandra longisepala Wurdack | Miconia secunlongisepala G. Ocampo & Almeda |
| Leandra luctatoris Wurdack | Miconia luctatoris (Wurdack) R.Goldenb. |
| Leandra lutea Cogn. | Miconia lutea (Cogn.) R.Goldenb. |
| Leandra macdanielii Wurdack | Miconia secunmacdanielii G. Ocampo & Almeda |
| Leandra macropora (O. Berg. ex Triana) Cogn. | Miconia macropora (Triana) R.Goldenb. |
| Leandra magdalenensis Brade | Miconia magdalenensis (Brade) R.Goldenb. |
| Leandra magnipetala R. Goldenb & E. Camargo | Miconia magnipetala (R.Goldenb & E. Camargo) R.Goldenb. |
| Leandra maguirei Wurdack | Miconia secunmaguirei G. Ocampo & Almeda |
| Leandra marigotiana (Urb. & Ekman) Alain | Miconia marigotiana (Urb. & Ekm.) Majure & Judd |
| Leandra markgrafii Brade | Miconia leamarkgrafii R.Goldenb. |
| Leandra mattosii Baumgratz & D'El Rei Souza | Miconia mattosii (Baumgratz & D'El Rei Souza) R.Goldenb. |
| Leandra melanodesma (Naudin) Cogn. | Miconia melanodesma (Naudin) Michelang. & R. Goldenb. |
| Leandra melastomoides Raddi | Miconia melastomoides (Raddi) R.Goldenb. |
| Leandra mexicana (Naudin) Cogn. | Miconia secunmexicana G. Ocampo & Almeda |
| Leandra miconiastrum (Naudin) Cogn. | Miconia miconiastrum (Naudin) R.Goldenb. |
| Leandra micrantha Wurdack | Miconia microflora R.Goldenb. & Michelang. |
| Leandra micropetala (Naudin) Cogn. | Miconia nanopetala R.Goldenb. & Michelang. |
| Leandra microphylla Cogn. | Miconia dusenii (Cogn.) R.Goldenb. |
| Leandra mollis Cogn. | Miconia leamollis R.Goldenb. |
| Leandra mouraei Cogn. | Miconia leamourae R.Goldenb. |
| Leandra multiplinervis (Naudin) Cogn. | Miconia oocarpa (A.Gray) R.Goldenb. |
| Leandra multisetosa Cogn. | Miconia multisetosa (Cogn.) R.Goldenb. |
| Leandra nanayensis Wurdack | Miconia nanayensis (Wurdack) R.Goldenb. & Michelang. |
| Leandra navicularis Brade | Miconia navicularis (Brade) R.Goldenb. |
| Leandra neblinensis Wurdack | Miconia secunneblinensis G. Ocampo & Almeda |
| Leandra neglecta Brade | Miconia neglecta (Brade) R.Goldenb. |
| Leandra nervosa (Naudin) Cogn. | Miconia nervosissima Michelang. & R.Goldenb. |
| Leandra neurotricha Cogn. | Miconia leaneurotricha R.Goldenb. |
| Leandra nianga (DC) Cogn. | Miconia nianga (DC.) R.Goldenb. |
| Leandra niangaeformis Cogn. | Miconia niangaeformis (Cogn.) R.Goldenb. |
| Leandra niederleinii Cogn. | Miconia niederleinii (Cogn.) R.Goldenb. |
| Leandra oblongifolia Cogn. | Miconia leaoblongifolia R.Goldenb. |
| Leandra oligochaeta Cogn. | Miconia oligochaeta (Cham.) R.Goldenb. |
| Leandra opaca Brade | Miconia opaca (Brade) R.Goldenb. |
| Leandra organensis Cogn. | Miconia leaorganensis R.Goldenb. |
| Leandra ossaeoides (Naudin) Cogn. | Miconia ossaeoides (Naudin) Michelang. & Tiernan |
| Leandra ovata Cogn. | Miconia leaovata R.Goldenb. |
| Leandra paleacea Wurdack | Miconia paleaciramis Michelang. & R.Goldenb. |
| Leandra pallida Cogn. | Miconia leapallida R.Goldenb. |
| Leandra papillata Cogn. | Miconia papillata (Cogn.) R.Goldenb. |
| Leandra pastazana Wurdack | Miconia secunpastazana G. Ocampo & Almeda |
| Leandra paulina DC. | Miconia paulina (DC.) R.Goldenb. |
| Leandra pectinata Cogn. | Miconia pectinata (Cogn.) R. Goldenb. |
| Leandra peltata Wurdack | Miconia peltifolia R.Goldenb. & Michelang. |
| Leandra penduliflora (Naudin) Cogn. | Miconia dolichodons (Cogn.) R.Goldenb. |
| Leandra pennipilis (O. Berg. ex Triana) Cogn. | Miconia leapennipilis R.Goldenb. |
| Leandra phelpsiae Gleason | Miconia phelpsiae (Gleason) R.Goldenb. & Michelang. |
| Leandra pilonensis Wurdack | Miconia pilonensis (Wurdack) R.Goldenb. |
| Leandra pilosissima Cogn. | Miconia pilosissima (Cogn.) R.Goldenb. |
| Leandra planifilamentosa Brade | Miconia planifilamentosa (Brade) R.Goldenb. |
| Leandra polyadena Ule | Miconia polyadena (Ule) R.Goldenb. & Michelang. |
| Leandra polychaeta (Urb. & Ekm.) Alain | Miconia pedunculata Majure & Judd |
| Leandra polychaeta Cogn. | Miconia leapolychaeta R.Goldenb. |
| Leandra polystachya (Naudin) Cogn. | Miconia polystachya (Naudin) R.Goldenb. |
| Leandra procumbens Ule | Miconia chimantensis (Wurdack) Michelang. |
| Leandra purpurascens (DC.) Cogn. | Miconia microstachya (Naudin) R.Goldenb. |
| Leandra purpurea Gleason | Miconia purpuriflora Michelang. & R.Goldenb. |
| Leandra purpureo-villosa Hoehne | Miconia purpureovillosa (Hoehne) R.Goldenb. |
| Leandra quinquedentata (DC.) Cogn. | Miconia quinquedentata (DC.) R.Goldenb. |
| Leandra quinquenodis (DC) Cogn. | Miconia quinquenodis (DC.) R.Goldenb. |
| Leandra raimondiana Markgr. | Miconia raimondiana (Markgr.) R.Goldenb. & Michelang. |
| Leandra ramboi Brade | Miconia learamboi R.Goldenb. |
| Leandra refracta Cogn. | Miconia refracta (Cogn.) R.Goldenb. |
| Leandra regnellii (Triana) Cogn. | Miconia alterninervia (Cogn.) R.Goldenb. |
| Leandra reitzii Wurdack | Miconia reitzii (Wurdack) R.Goldenb. |
| Leandra reptans R. Goldenb. & Reginato | Miconia reptans (R.Goldenb. & Reginato) R. Goldenb. |
| Leandra retropila Cogn. | Miconia secunretropila G. Ocampo & Almeda |
| Leandra reversa (DC.) Cogn. | Miconia reversa (DC.) G. Ocampo & Almeda |
| Leandra rhamnifolia (Naudin) Cogn. | Miconia rhamnifolia (Naudin) G. Ocampo & Almeda |
| Leandra rhodopogon (DC.) Cogn. | Miconia rhodopogon (DC.) R.Goldenb. |
| Leandra ribesiaeflora (Cham.) Cogn. | Miconia ribesiiflora (DC.) R.Goldenb. |
| Leandra riedeliana (O. Berg. ex Triana) Cogn. | Miconia leariedeliana R.Goldenb. |
| Leandra rigida Cogn. | Miconia learigida R.Goldenb. |
| Leandra riograndensis (Brade) Wurdack | Miconia riograndensis (Brade) R.Goldenb. |
| Leandra rotundifolia J.F.Macbr. | Miconia secunrotundifolia G. Ocampo & Almeda |
| Leandra rubida Cogn. | Miconia rubida (Cogn.) R.Goldenb. |
| Leandra rufescens (DC.) Cogn. | Miconia asperiuscula (Rich. ex DC.) R.Goldenb. |
| Leandra sabiaensis Brade | Miconia sabiaensis (Brade) R.Goldenb. |
| Leandra saldanhaei Cogn. | Miconia leasaldanhae R.Goldenb. |
| Leandra salicina (Ser. ex DC.) Cogn. | Miconia salicina (Ser. Ex DC.) Mabb. |
| Leandra sanguinea Gleason | Miconia secunsanguinea G. Ocampo & Almeda |
| Leandra santos-limae Brade | Miconia santoslimae (Brade) R.Goldenb. |
| Leandra secunda (D.Don) Cogn. | Miconia neosecunda G. Ocampo & Almeda |
| Leandra secundiflora (DC.) Cogn. | Miconia neosecundiflora G. Ocampo & Almeda |
| Leandra sericea DC. | Miconia raddii R.Goldenb. |
| Leandra simplicicaulis (Naudin) Cogn. | Miconia simplicicaulis (Naudin) R.Goldenb. |
| Leandra solenifera Cogn. | Miconia solenifera (Cogn. ) G. Ocampo & Almeda |
| Leandra sparsisetulosa Hoehne | Miconia sparsisetulosa (Hoehne) R.Goldenb. |
| Leandra sphaerocarpa Cogn. | Miconia sphaerocarpa (Cogn.) R.Goldenb. |
| Leandra stellulata Cogn. | Miconia stellulitricha R.Goldenb. & Michelang. |
| Leandra steyermarkii Wurdack | Miconia juliansteyermarkii R.Goldenb. & Michelang. |
| Leandra strigilliflora (Naudin) Cogn. | Miconia strigilliflora (Naudin) R.Goldenb. |
| Leandra subobruta Wurdack | Miconia subobruta (Wurdack) R.Goldenb. & Michelang. |
| Leandra subseriata (Naudin) Cogn. | Miconia subseriata (Naudin) R.Goldenb. & Michelang. |
| Leandra subtrinervis Cogn. | Miconia subtrinervis (Cogn.) R.Goldenb. |
| Leandra subulata Gleason | Miconia subulata (Gleason) R.Goldenb. & Michelang. |
| Leandra sulfurea (Naudin) Cogn. | Miconia sulfurea (Naudin) R.Goldenb. |
| Leandra sylvatica Cogn. | Miconia leasylvatica R.Goldenb. |
| Leandra ternata Cogn. | Miconia ternata (Cogn.) R.Goldenb. |
| Leandra tetragona Cogn. | Miconia leatetragona R.Goldenb. |
| Leandra tetraptera Cogn. | Miconia leatetraptera R.Goldenb. |
| Leandra tetraquetra (Cham.) Cogn. | Miconia tetraquetra (Cham.) R.Goldenb. |
| Leandra therezopolitana Cogn. | Miconia therezopolitana (Cogn.) R.Goldenb. |
| Leandra thyrsiflora Markgr. ex Pilg. | Miconia leathyrsiflora R.Goldenb. |
| Leandra tomentosa Cogn. | Miconia leatomentosa R.Goldenb. |
| Leandra triantha R. Goldenb & E. Camargo | Miconia triantha (R.Goldenb. & E.Camargo) R.Goldenb. |
| Leandra tristis Cogn. | Miconia leatristis R.Goldenb. |
| Leandra truncata Baumgratz & D'El Rei Souza | Miconia leatruncata R.Goldenb. |
| Leandra ulaei Cogn. | Miconia ulei (Cogn.) R.Goldenb. |
| Leandra uliginosa Brade | Miconia uliginosa (Brade) R.Goldenb. |
| Leandra umbellata DC. | Miconia leaumbellata R.Goldenb. |
| Leandra variabilis Raddi | Miconia dasytricha (A.Gray) R.Goldenb. |
| Leandra velutina (Gardn.) Cogn. | Miconia leavelutina R.Goldenb. |
| Leandra verticillata (DC.) Cogn. | Miconia verticillifolia Michelang. & R.Goldenb. |
| Leandra vesiculosa Cogn. | Miconia vesiculosa (Cogn.) R.Goldenb. |
| Leandra viridiflava Brade | Miconia viridiflava (Brade) R.Goldenb. |
| Leandra viscosa Cogn. | Miconia viscosa (Cogn.) R.Goldenb. |
| Leandra warmingiana Cogn. | Miconia leawarmingiana R.Goldenb. |
| Leandra xanthocoma (Naudin) Cogn. | Miconia xanthocoma (Naudin) R.Goldenb. |
| Leandra xantholasia (DC.) Cogn. | Miconia xantholasia (DC.) R.Goldenb. |
| Leandra xanthopogon (Naudin) Cogn. | Miconia xanthopogon (Naudin) R.Goldenb. |
| Leandra xanthostachya Cogn. | Miconia xanthostachya (Cogn.) R.Goldenb. |
| Llewelynia wiliamsii Pittier | Henriettea williamsii (Pittier) Penneys, Michelangeli, Judd & Almeda |
| Loreya arborescens (Aubl.) DC. | Bellucia arborescens (Aubl.) Baill. |
| Loreya gracilis S.S.Renner | Bellucia gracilis (Renner) Penneys, Michelangeli, Judd & Almeda |
| Loreya huberi Wurdack | Bellucia huberi (Wurdack) S.S.Renner |
| Loreya klugii S.S.Renner | Bellucia klugii (Renner) Penneys, Michelangeli, Judd & Almeda |
| Loreya mespiloides Miq. | Bellucia mespiloides (Miq.) J.F.Macbr. |
| Loreya mucronata Gleason | Henriettea mucronata (Gleason) S.S.Renner |
| Loreya nigricans (Hook. f.) Triana | Bellucia nigricans (Hook. f.) Penneys, Michelangeli, Judd & Almeda |
| Loreya ovata O.Berg ex Triana | Bellucia ovata (O. Berg. ex Triana) Penneys, Michelangeli, Judd & Almeda |
| Loreya riparia S.S.Renner | Bellucia riparia (Renner) Penneys, Michelangeli, Judd & Almeda |
| Loreya spruceana Benth. ex Triana | Bellucia spruceana (Benth. ex Triana) J.F.Macbr. |
| Loreya strigosa Gleason | Bellucia strigosa (Gleason) Penneys, Michelangeli, Judd & Almeda |
| Loreya subandina Wurdack | Bellucia subandina (Wurdack) Penneys, Michelangeli, Judd & Almeda |
| Loreya subrotundifolia (Wurdack) S.S.Renner | Bellucia subrotundifolia Wurdack |
| Loreya umbellata (Gleason) Wurdack | Bellucia umbellata Gleason |
| Loreya wurdackiana S.S.Renner | Bellucia wurdackiana (Renner) Penneys, Michelangeli, Judd & Almeda |
| Maieta guianensis Aubl. | Miconia mayeta (D. Don) Michelang. |
| Maieta neblinensis Wurdack | Miconia alatiflora Michelang. |
| Maieta poeppigii Mart. ex Cogn. | Miconia alternidomatia Michelang. |
| Mecranium acuminatum (DC.) Skean | Miconia acuminoides Skean, Judd & Majure |
| Mecranium alpestre Urb. & Ekman | Miconia rufoalpestris Skean, Judd & Majure |
| Mecranium amygdalinum (Desr.) C.Wright | Miconia neoamygdalina Skean, Judd & Majure |
| Mecranium axillare (Macfadyen) Skean | Miconia axillaris (Macfad.) Skean, Judd & Majure |
| Mecranium axillare subsp. proctorii Skean | Miconia Miconia axillare subsp. proctori (Skean) Skean |
| Mecranium axillare subsp. urbanianum (Cogn.) Skean | Miconia Miconia axillaris subsp. urbaniana (Skean) Skean |
| Mecranium birimosum (Naudin) Triana | Miconia birrimosa (naudin) Skean, Judd & Majure |
| Mecranium crassinerve (Urb.) Skean | Miconia crassinervis (Urb.) Skean, Judd & Majure |
| Mecranium haemanthum Triana ex Cogn. | Miconia haemantha (Triana ex Cogn.) Skean, Judd & Majure |
| Mecranium haitiense Urb. | Miconia ayisyena Skean, Judd & Majure |
| Mecranium integrifolium (Naudin) Triana | Miconia antillana Skean, Judd & Majure |
| Mecranium integrifolium subsp. alainii Skean | Miconia Miconia antillana subsp. alainii (Skean) Skean, Judd & Majure |
| Mecranium integrifolium subsp. neibense (Skean) Skean | Miconia Miconia antillana subsp. neibensis (Skean) Skean, Judd & Majure |
| Mecranium juddii Skean | Miconia juddii (Skean) Skean, Judd & Majure |
| Mecranium latifolium (Cogn.) Skean | Miconia borinquensis Skean, Judd & Majure |
| Mecranium microdictyum Urb. & Ekman | Miconia microdicta (Urb. & Ekman) Skean, Judd & Majure |
| Mecranium multiflorum (Desr.) Triana | Miconia polyflora Skean, Judd & Majure |
| Mecranium obtusifolium Cogn. | Miconia obtusifolia (Cogn.) Skean, Judd & Majure |
| Mecranium ovatum Cogn. | Miconia bahorucensis Skean, Judd & Majure |
| Mecranium plicatum Urb. | Miconia plicatifolia Skean, Judd & Majure |
| Mecranium puberulum Cogn. | Miconia hirticaulis Skean, Judd & Majure |
| Mecranium purpurascens (DC.) Triana | Miconia ossaeiformis Naudin |
| Mecranium racemosum (Griseb.) C.Wright | Miconia conica Skean, Judd & Majure |
| Mecranium revolutum Skean & Judd | Miconia revolutifolia Skean, Judd & Majure |
| Mecranium septentrionale Skean | Miconia ocampensis Skean, Judd & Majure |
| Mecranium tricostatum Urb. & Ekman | Miconia tricostata (Urb. & Ekman) Skean, Judd & Majure |
| Mecranium tuberculatum Urb. | Miconia haemanthoides Skean, Judd & Majure |
| Mecranium virgatum (Sw.) Triana | Miconia virgata (Sw.) Skean, Judd & Majure |
| Miconiastrum lambertianum Bonpl. ex Naudin | Miconia maestrensis Judd, Bécquer, & Majure |
| Microlepis oleaefolia DC. | Pleroma oleifolium (DC.) R. Romero & Versiane |
| Myriaspora egensis DC. | Bellucia egensis (DC.) Penneys, Michelangeli, Judd & Almeda |
| Necramium gigantophyllum Britton | Miconia gigantophylla (Britton) Michelang. |
| Ossaea acunae | Miconia acunagalei Judd, Bécquer & Majure |
| Ossaea amygdaloides (DC.) Triana | Miconia amygdaloides (DC.) R.Goldenb. |
| Ossaea angustifolia (DC.) Triana | Miconia corcovadensis (Raddi) R.Goldenb. |
| Ossaea araneifera Markgr. | Miconia araneifera (Markg.) Michelang. & R.Goldenb. |
| Ossaea asperifolia (Naudin) Triana | Miconia asperifolia (Naudin) Majure & Judd |
| Ossaea asplundii Wurdack | Miconia alboglandulosa Gamba & Almeda |
| Ossaea baracoensis Borhidi & O. Muñiz | Miconia borhidiana Judd, Bécquer & Majure |
| Ossaea boekei Wurdack | Miconia boekei (Wurdack) Gamba & Almeda |
| Ossaea boliviensis (Cogn.) Gleason | Miconia violascens (Pilg.) Michelang. & R.Goldenb. |
| Ossaea brachystemon Urb | Miconia brachystemon (Urb.) Judd, Bécquer & Majure |
| Ossaea bracteata Triana | Miconia bractiflora Gamba & Almeda |
| Ossaea brenesii Standley | Miconia albertobrenesii Gamba & Almeda |
| Ossaea brunescens Urb. | Miconia brunescens ((Urb.)) Bécquer & Skean |
| Ossaea buchtienii Gleason | Miconia ottobuchtienii Michelang. & R.Goldenb. |
| Ossaea bullifera (Pilg.) Gleason | Miconia myrmecodomatia Michelang. |
| Ossaea cabraliensis (Wurdack) D'El Rei Souza | Miconia cabraliensis (Wurdack) R.Goldenb. |
| Ossaea capillaris (D.Don) Cogn. | Miconia leptopus (Triana) Michelang. & R.Goldenb. |
| Ossaea capitata Urb. | Miconia tentaculicapitata Majure & Judd |
| Ossaea cinnamomifolia (Cham. ex Naudin) Triana | Miconia leacinnamomifolia R.Goldenb. |
| Ossaea coarctiflora Wurdack | Miconia coarctiflora (Wurdack) G. Ocampo & Almeda |
| Ossaea confertiflora (DC.) Triana | Miconia rubella (Raddi) R.Goldenb. |
| Ossaea congestiflora Cogn. | Miconia leacongestiflora R.Goldenb. |
| Ossaea coriacea (Naudin) Triana | Miconia leabiscoriacea R.Goldenb. |
| Ossaea costata Urb. | Miconia costata (Urb.) Judd, Bécquer & Majure |
| Ossaea cubana Alain | Miconia cubana (Alain) Majure & Judd |
| Ossaea cucullata Gleason | Miconia cucullata (Gleason) Michelang. |
| Ossaea cuneata Cogn. | Miconia leacuneata R.Goldenb. |
| Ossaea echinata (Griseb.) M. Gómez | Miconia echinata (Griseb.) Judd, Bécquer & Majure |
| Ossaea ekmanii Urb. | Miconia ekmanii (Urb.) Judd, Bécquer & Majure |
| Ossaea elliptica Alain | Miconia ascenditricha Judd, Bécquer & Majure |
| Ossaea euphorbioides (Naudin) Triana | Miconia euphorbioides (Naudin) R.Goldenb. |
| Ossaea filisepala Urb. | Miconia filisepala (Urb.) Judd, Bécquer & Majure |
| Ossaea filisepala Urb. | Miconia filisepala (Urb.) Judd, Bécquer & Majure |
| Ossaea fragilis Cogn. | Miconia leafragilis R.Goldenb. |
| Ossaea glomerata (Naudin) Triana | Miconia glomeruliflora Judd, Bécquer&Majure |
| Ossaea granulata Urb. | Miconia granulata (Urb.) Majure & Judd |
| Ossaea heterotricha (Griseb.) C. Wright | Miconia yunquensis Judd, Bécquer & Majure |
| Ossaea hirsuta (Sw.) Triana | Miconia hirsuta (Sw.) Judd, Bécquer & Majure |
| Ossaea hirtella (DC.) Triana | Miconia hirtellicaulis Ionta & Judd |
| Ossaea hypoglauca (C. Wright ex Griseb.) M. Gómez | Miconia hypoglauca (C. Wright ex Griseb.) Judd, Bécquer& Majure |
| Ossaea incerta Wurdack | Miconia incerta (Wurdack) Gamba & Almeda |
| Ossaea involucrata (Griseb.) C. Wright | Miconia grandibracteata Judd, Bécquer & Majure |
| Ossaea lanata (Naudin) C. Wright ex Griseb. | Miconia lanatifolia Judd, Bécquer & Majure |
| Ossaea lanceolata Urb. | Miconia echinocarpa Judd, Bécquer & Majure |
| Ossaea laxivenula Wurdack | Miconia laxivenula (Wurdack) Gamba & Almeda |
| Ossaea macrophylla (Benth.) Cogniaux | Miconia solearis (Naudin) Gamba & Almeda |
| Ossaea marginata (Desr.) Triana | Miconia leamarginata R.Goldenb. |
| Ossaea mavacana Wurdack | Miconia mavacana (Wurdack) Michelang. |
| Ossaea meridionalis D'El Rei Souza | Miconia meridionalis (D'El Rei Souza) R.Goldenb. |
| Ossaea micrantha (Sw.) Cogn. | Miconia rubescens (Triana) Gamba & Almeda |
| Ossaea microphylla (Sw.) C. Wright | Miconia pratensis Judd, Bécquer & Majure |
| Ossaea moaensis Alain | Miconia lutgardae Becquer & Michelang. |
| Ossaea muricata (Griseb.) C. Wright | Miconia argentimuricata Majure & Judd |
| Ossaea navasensis Britton & P.Wilson | Miconia navasenssis (Briton & P Wilson) Ionta & Becquer |
| Ossaea neurotricha C.Wright | Miconia capillinervis Ionta & Judd |
| Ossaea nipensis Britton & P.Wilson | Miconia nipensis (Briton & P Wilson) Ionta & Becquer |
| Ossaea norlindii Urb. | Miconia norlindii (Urb.) Majure & Judd |
| Ossaea ottoschmidtii Urb. | Miconia ottoschmidtii (Urb.) Majure & Judd |
| Ossaea ovatifolia Urb. | Miconia ovatifolia (Urb.) Judd, Bécquer & Majure |
| Ossaea palenquensisWurdack | Miconia palenquensis (Wurdack) Gamba & Almeda |
| Ossaea parvifolia Alain | Miconia nanophylla Judd, Bécquer & Majure |
| Ossaea petiolaris (Naudin) Triana | Miconia secunpetiolaris G. Ocampo & Almeda |
| Ossaea pilifera Urb. | Miconia pilifera (Urb.) Ionta & Becquer |
| Ossaea pinetorum Alain | Miconia pseudopinetorum (Alain) Judd, Bécquer & Majure |
| Ossaea pseudopinetorum Borhidi & O. Muñiz | Miconia pseudopinetorum (Alain) Judd, Bécquer & Majure |
| Ossaea pulchra Alain | Miconia vazquezii (Borhidi & Muniz) Ionta & Becquer |
| Ossaea pulverulenta Urb. | Miconia pulverata Judd, Bécquer & Majure |
| Ossaea quadrisulca (Naudin) Wurdack | Miconia quadrisulca (Naudin) G. Ocampo & Almeda |
| Ossaea resinosa Gleason | Miconia resinosa (Gleason) Michelang. |
| Ossaea retropila (DC.) Triana | Miconia retropila (Triana) G. Ocampo & Almeda |
| Ossaea robusta (Triana) Cogniaux | Miconia variabilis Gamba & Almeda |
| Ossaea rubrinervis Urb. & Ekman | Miconia rufinervis Judd |
| Ossaea rufescens (Griseb.) Wright | Miconia ruficaulis Ionta & Becquer |
| Ossaea rufibarbis Triana | Miconia rufibarbis (Triana) Gamba & Almeda |
| Ossaea sanguinea Cogn. | Miconia leasanguinea R.Goldenb. |
| Ossaea secundiflora Cogn. | Miconia bisecundiflora G. Ocampo & Almeda |
| Ossaea sessilifolia (Triana) Wurdack | Miconia sessilis Gamba & Almeda |
| Ossaea shaferi Britton & Wilson | Miconia jashaferi Majure & Judd |
| Ossaea sparrei Wurdack | Miconia bensparrei Gamba & Almeda |
| Ossaea spicata Gleason | Miconia spicata (Gleason) Gamba & Almeda |
| Ossaea sulbahiensis D'El Rei Souza | Miconia sulbahiensis (D'El Rei Souza) R.Goldenb. |
| Ossaea suprabasalis R.Goldenb. & Reginato | Miconia suprabasalis (R.Goldenb. & Reginato) R.Goldenb. |
| Ossaea trianaei Cogn. | Miconia trianana Judd & Becquer |
| Ossaea turquinensis Urb | Miconia norlindii (Urb.) Majure & Judd |
| Ossaea vazquezii Borhidi & O.Muniz | Miconia vazquezii (Borhidi & O.Muniz) Ionta & Becquer |
| Ossaea verrucosa (Griseb.) M. Gómez | Miconia costata (Urb.) Judd, Bécquer & Majure |
| Ossaea warmingiana Cogn. | Miconia leabiswarmingiana R.Goldenb. |
| Ossaea wilsonii Alain | Miconia scaberrima Judd, Bécquer & Majure |
| Ossaea wrightii Triana | Miconia munizii (Borhidi) Ionta & Becquer |
| Pachyanthus angustifolius Griseb. | Miconia secundo-angustifolia (Griseb.) M. Gomez |
| Pachyanthus blancheanus (Urb.) Urb. & Ekman | Miconia blancheana Urb. |
| Pachyanthus clementis P.Wilson | Miconia clementii (P.Wilson) Becquer |
| Pachyanthus cubensis A.Rich. | Miconia pachyantha Becquer |
| Pachyanthus discolor Norlind ex Urb. | Miconia discolorata Becquer |
| Pachyanthus longifolius Jenn. | Miconia brachyloba (Urb.) Becquer |
| Pachyanthus lundellianus (L.O.Williams) Judd & Skean | Miconia lundelliana L.O.Williams |
| Pachyanthus mantuensis Britton & P.Wilson | Miconia mantuensis (Britton & P.Wilson) Becquer |
| Pachyanthus mayarensis Urb. | Miconia mayarensis (Urb.) Becquer & Michelang. |
| Pachyanthus moaensis Borhidi | Miconia yamanigueyensis Becquer & Michelang. |
| Pachyanthus monocephalus (Urb.) Borhidi | Miconia monocephala Urb. |
| Pachyanthus monopleurus Urb. | Miconia monopleura (Urb.) Becquer & Majure |
| Pachyanthus neglectus Borhidi | Miconia omissa Becquer & Michelang. |
| Pachyanthus oleifolius Griseb. | Miconia oleifolia (Griseb.) M. Gomez |
| Pachyanthus pedicellatus Urb. | Miconia pseudopedicellata Judd & Becquer |
| Pachyanthus poiretii Griseb. | Miconia poiretii (Griseb.) M. Gomez |
| Pachyanthus reticulatus Britton & P.Wilson | Miconia lindmanii (Urb.) Becquer |
| Pachyanthus tetramerus Urb. & Ekman | Miconia tetramera (Urb. & Ekman) Becquer |
| Pachyanthus wrightii Griseb. | Miconia wrightii (Griseb.) Triana |
| Pleiochiton amorimii Reginato & R. Goldenb. | Miconia amorimii (Reginato & R. Goldenb) R.Goldenb. |
| Pleiochiton blepharodes (DC.) Reginato, R. Goldenb. & Baumgratz; comb. | Miconia blepharodes (DC.) R.Goldenb. |
| Pleiochiton crassifolium Naudin ex A.Gray | Miconia pleiocrassifolia R.Goldenb. |
| Pleiochiton ebracteatum Triana | Miconia ebracteata (Triana) R.Goldenb. |
| Pleiochiton glaziovianum Cogn. | Miconia pleioglazioviana R.Goldenb. |
| Pleiochiton longipetiolatum Brade | Miconia longipetiolata (Brade) R.Goldenb. |
| Pleiochiton magdalenense Brade | Miconia pleiomagdalenensis R.Goldenb. |
| Pleiochiton micranthum Cogn. | Miconia pleiomicrantha R.Goldenb. |
| Pleiochiton parasiticum (O'Berg ex Triana) Reginato, R. Goldenb. & Baumgratz | Miconia parasitica (O.Berg ex Triana) R.Goldenb. |
| Pleiochiton parvifolium Cogn. | Miconia pleioparvifolia R.Goldenb. |
| Pleiochiton roseum Cogn. | Miconia pleiorosea R.Goldenb. |
| Pleiochiton setulosum Cogn. | Miconia pleiosetulosa R.Goldenb. |
| Purpurella cleistoflora Ule | Pleroma cleistoflorum (Ule) P.J.F.Guim., Oliveira da Silva & Michelang. |
| Sagraea abbottii (Urb.) Alain | Miconia abbottii (Urb.) Ionta & Judd |
| Sagraea barahonensis (Urb. & Ekman) Alain | Miconia barahonensis (Urb. & Ekman) Ionta & Judd |
| Sagraea capillaris (Sw.) DC. | Miconia capillaris (Sw.) Ionta, Judd & Skean |
| Sagraea cinerea (Cogn.) Alain | Miconia cinereiformis Ionta, Judd & Skean |
| Sagraea curvipila (Urb. & Ekman) Alain | Miconia curvipila (Urb. & Ekman) Ionta, Judd & Skean |
| Sagraea ellipsoidea (Urb. & Ekman) Alain | Miconia ellipsoidea (Urb. & Ekman) Ionta, Judd & Skean |
| Sagraea fuertesii (Cogn.) Alain | Miconia miguelfuertesii Ionta & Judd |
| Sagraea gracilis (Alain) Alain | Miconia gracilifolia Ionta & Judd |
| Sagraea lanceifolia (Urb.) Alain | Miconia lanceifolia (Urb.) Ionta, Judd & Skean |
| Sagraea oligantha (Urb.) Alain | Miconia spanantha Judd & Majure |
| Sagraea penninervis (Griseb.) Triana | Miconia penninervis (Griseb.) M. Gomez |
| Sagraea polychaete (Urb. & Ekman) Alain | Miconia polychaete (Urb. & Ekman) Ionta, Judd & Skean |
| Sagraea pusilliflora (Cogn.) Alain | Miconia portoricensis (Alain) Ionta, Judd & Skean |
| Sagraea scabrosa (L.) Naudin | Miconia scabrosa (L.) Ionta, Judd & Skean |
| Sagraea setulosa (Urb.) Alain | Miconia rubrisetulosa Ionta, Judd & Skean |
| Sagraea woodsii (Judd & Skean) Alain | Miconia woodsii (Judd & Skean) Ionta, Judd & Skean |
| Salpinga margaritacea (Naudin) Triana | Bertolonia margaritacea Naudin |
| Svitramia hatschbachii Wurdack | Pleroma gertii P.J.F. Guim. & Michelang. |
| Svitramia integerrima R.Romero & A.B.Martins | Pleroma integerrima (R.Romero & A.B.Martins) P.J.F. Guim. & Michelang. |
| Svitramia minor R.Romero & A.B.Martins | Pleroma minus (R.Romero & A.B.Martins) P.J.F. Guim. & Michelang. |
| Svitramia petiolata R.Romero & A.B.Martins | Pleroma petiolatum (R.Romero & A.B.Martins) P.J.F. Guim. & Michelang. |
| Svitramia pulchra Cham. | Pleroma bandeirae P.J.F. Guim. & Michelang. |
| Svitramia wurdackiana R.Romero & A.B.Martins | Pleroma wurdackianum (R.Romero & A.B.Martins) P.J.F. Guim. & Michelang. |
| Tetrazygia albicans Triana | Miconia proctorii Judd |
| Tetrazygia angustiflora (Benth.) Griseb. | Miconia angustiflora (Benth.) Naudin |
| Tetrazygia angustifolia (Sw.) DC. | Miconia angustifolia (Sw.) Griseb. |
| Tetrazygia aurea R.A.Howard & W.R.Briggs | Miconia aurifolia Becquer & Judd |
| Tetrazygia barbata Borhidi | Miconia barbata (Borhidi) Judd, Bécquer, & Majure |
| Tetrazygia bicolor (Mill.) Cogn. | Miconia bicolor (Mill.) Triana |
| Tetrazygia bicolor (Mill.) Cogn. var. patenti-setosa Borhidi | Miconia bicolor (Mill. ) Triana var. patenti-setosa (Borhidi) Judd, Bécquer, & Majure |
| Tetrazygia biflora (Cogn.) Urb. | Miconia biflora (Cogn.) Judd |
| Tetrazygia brachycentra (Griseb.) C. Wright | Miconia brachycentra (Griseb.) M. Gomez |
| Tetrazygia cordata Alain | Miconia cordilamina Becquer & Judd |
| Tetrazygia coriacea Urb. | Miconia cajalbanensis Judd, Bécquer, & Majure |
| Tetrazygia cristalensis Borhidi | Miconia cristalensis (Borhidi) Judd, Bécquer, & Majure |
| Tetrazygia decorticans Becquer | Miconia decorticans (Becquer) Becquer & Majure |
| Tetrazygia discolor (L.) DC. | Miconia christophoriana (Ham.) DC. |
| Tetrazygia ekmanii Urb. | Miconia tetrazygioidea Becquer & Judd |
| Tetrazygia elaeagnoides (Sw.) DC | Miconia elaeagnoides (Sw.) Griseb. |
| Tetrazygia elegans Urb. | Miconia elegantissima Becquer & Judd |
| Tetrazygia fadyenii Hook. | Miconia fadyenii (Hook.) Judd & Skean |
| Tetrazygia hispida (Sw.) Macfad. | Miconia glandulosa (Sw.) Naudin |
| Tetrazygia impressa Urb | Miconia impressa (Urb.) Judd, Bécquer, & Majure |
| Tetrazygia lanceolata Urb., | Miconia guajaibonensis Judd, Bécquer, & Majure |
| Tetrazygia laxiflora Naudin | Miconia rangeliana C.Wright ex Griseb. |
| Tetrazygia longicollis Urb. & Cogn. | Miconia longicollis (Urb. & Ekman) Judd & Becquer |
| Tetrazygia paralongicollis Judd, Ionta, Clase & Skean | Miconia paralongicollis (Judd et al.) Judd & Becquer |
| Tetrazygia urbani Cogn. | Miconia urbanii (Cogn.) Judd |
| Tibouchina ackermannii Cogn. | Pleroma ackermannii (Cogn.) P. J. F. Guim. & Michelang. |
| Tibouchina ademarii P.J.F. Guim., R. Romero & Leoni | Pleroma ademarii (P.J.F.Guim., R.Romero & Leoni) P. J. F. Guim. & Michelang. |
| Tibouchina adenophora Cogn. | Chaetogastra adenophora (Cogn.) P.J.F. Guim. & Michelang. |
| Tibouchina alata Cogn. | Pleroma alatum (Cogn.) P. J. F. Guim. & Michelang. |
| Tibouchina almedae Todzia | Chaetogastra almedae (Todzia) P.J.F. Guim. & Michelang. |
| Tibouchina alpestris Cogn. | Chaetogastra montana P.J.F. Guim. & Michelang. |
| Tibouchina amoena Herzog | Pleroma amoenum (Herzog) P. J. F. Guim. & Michelang. |
| Tibouchina anderssonii Wurdack | Chaetogastra anderssonii (Wurdack) P.J.F. Guim. & Michelang. |
| Tibouchina andreana Cogn. | Chaetogastra andreana (Cogn.) P.J.F. Guim. & Michelang. |
| Tibouchina angustifolia Cogn. | Pleroma angustifolium (Naud.) Triana |
| Tibouchina apparicioi Brade | Pleroma apparicioi (Brade) P. J. F. Guim. & Michelang. |
| Tibouchina araneicalyx de Santiago | Chaetogastra araneicalyx (de Santiago) P.J.F. Guim. & Michelang. |
| Tibouchina arborea Cogn. | Pleroma arboreum Gardner |
| Tibouchina arenaria Cogn. | Pleroma arenarium (Cogn.) P. J. F. Guim. & Michelang. |
| Tibouchina aristeguietae Wurdack | Andesanthus aristeguietae (Wurdack) P.J.F.Guim. & Michelang. |
| Tibouchina arthrostemmoides Cogn. | Chaetogastra arthrostemmoides (Cogn.) P.J.F. Guim. & Michelang. |
| Tibouchina asperifolia Cogn. | Chaetogastra asperifolia (Cogn.) P.J.F. Guim. & Michelang. |
| Tibouchina asperior (Cham.) Cogn. | Pleroma asperius (Cham.) Triana |
| Tibouchina aurea Cogn. | Chaetogastra aurea (Cogn.) P.J.F. Guim. & Michelang. |
| Tibouchina australis Cogn. | Pleroma australe Triana |
| Tibouchina axillaris Cogn. | Pleroma axillare (Cogn.) P. J. F. Guim. & Michelang. |
| Tibouchina bahiensis Wurdack | Pleroma bahiense (Wurdack) P. J. F. Guim. & Michelang. |
| Tibouchina barnebyana Wurdack | Pleroma barnebyanum (Wurdack) P. J. F. Guim. & Michelang. |
| Tibouchina benthamiana Cogn. | Pleroma benthamianum Gardner |
| Tibouchina bergiana Cogn. | Pleroma bergianum (Cogn.) P. J. F. Guim. & Michelang. |
| Tibouchina blanchetiana Cogn. | Pleroma blanchetianum (Cogn.) P. J. F. Guim. & Michelang. |
| Tibouchina boraceiensis Brade | Pleroma boraceiensis (Brade) P. J. F. Guim. & Michelang. |
| Tibouchina boudetii P.J.F. Guim. & R. Goldenb. | Pleroma boudetii (P.J.F.Guim. & R.Goldenb.) P. J. F. Guim. & Michelang. |
| Tibouchina bracteolata J.G. Freitas, A.K.A. Santos & R.P. Oliveira | Pleroma bracteolatum (J. G. Freitas, A. K. A.Santos & R. P. Oliveira) P. J. F. Guim. & Michelang. |
| Tibouchina bradeana Renner | Pleroma edmundoi (Brade & Markgraf) P.J.F. Guim. & Michelang. |
| Tibouchina breedlovei Wurdack | Heterocentron breedlovei (Wurdack) P.J.F. Guim. & Michelang. |
| Tibouchina brittoniana Cogn. | Chaetogastra brittoniana (Cogn. ex Rusby) P.J.F. Guim. & Michelang. |
| Tibouchina campii Wurdack | Chaetogastra campii (Wurdack) P.J.F. Guim. & Michelang. |
| Tibouchina candolleana Cogn. | Pleroma candolleanum (Mart. ex. DC.) Triana |
| Tibouchina canescens Cogn. | Pleroma canescens (D.Don) P. J. F. Guim. & Michelang. |
| Tibouchina capitata (Naudin) Cogn. | Chaetogastra capitata (Naudin) P.J.F. Guim. & Michelang. |
| Tibouchina cardinalis Cogn. | Pleroma cardinale (Bonpl.) Triana |
| Tibouchina carvalhoi Wurdack | Pleroma carvalhoi (Wurdack) P. J. F. Guim. & Michelang. |
| Tibouchina castellensis Brade | Pleroma castellense (Brade) P. J. F. Guim. & Michelang. |
| Tibouchina cerastifolia Cogn. | Chaetogastra cerastifolia (Naudin) P.J.F. Guim. & Michelang. |
| Tibouchina chamaecistus Cogn. | Chaetogastra chamaecistus Sieber ex Grisebach |
| Tibouchina chamissoana Cogn. | Pleroma molle (Cham.) Triana |
| Tibouchina chiapensis Wurdack | Heterocentron chiapense (Wurdack) P.J.F. Guim. & Michelang. |
| Tibouchina chironioides (Triana) Cogn. | Chaetogastra chironioides Grisebach |
| Tibouchina ciliaris (Vent.) Cogn. | Chaetogastra ciliaris DC. |
| Tibouchina cinerea Cogn. | Pleroma cinereum (Cogn.) P. J. F. Guim. & Michelang. |
| Tibouchina cisplatensis Cogn. | Chaetogastra cisplatensis (Cogn.) P.J.F. Guim. & Michelang. |
| Tibouchina cistoides (Griseb.) Cogn. | Chaetogastra cistoides Griseb. |
| Tibouchina citrina (Naudin) Cogn. | Chaetogastra citrina (Naudin) P.J.F. Guim. & Michelang. |
| Tibouchina claussenii (Naudin) Cogn. | Pleroma claussenii (Naud.) Triana |
| Tibouchina clavata (Pers.) Wurdack | Pleroma clavatum (Persoon) P. J. F. Guim. & Michelang. |
| Tibouchina clidemioides Cogn. | Pleroma clidemioides Berg. ex Trianna |
| Tibouchina clinopodifolia (DC.) Cogn. | Chaetogastra clinopodifolia DC. |
| Tibouchina collina Cogn. | Pleroma collinum (Naudin) Triana |
| Tibouchina comosa J.G. Freitas, A.K.A. Santos & R.P. Oliveira | Pleroma comosum (J. G. Freitas, A. K. A.Santos & R. P. Oliveira) P. J. F. Guim. & Michelang. |
| Tibouchina confertiflora (Naudin) Cogn. | Chaetogastra confertiflora (Naudin) P.J.F. Guim. & Michelang. |
| Tibouchina congestiflora Todzia | Chaetogastra congestiflora (Todzia) P.J.F. Guim. & Michelang. |
| Tibouchina connata Todzia | Chaetogastra connata (Gleason ex Todzia) P.J.F. Guim. & Michelang. |
| Tibouchina cordifolia Cogn. | Pleroma cordifolium (Cogn.) P. J. F. Guim. & Michelang. |
| Tibouchina cornuta Gleason | Chaetogastra cornuta (Gleason) P.J.F. Guim. & Michelang. |
| Tibouchina crassiramis Cogn. | Pleroma crassirame (Cogn.) P. J. F. Guim. & Michelang. |
| Tibouchina cristata Brade | Pleroma cristatum (Brade) P. J. F. Guim. & Michelang. |
| Tibouchina cryptadena Gleason | Pleroma cryptadenum (Gleason) P. J. F. Guim. & Michelang. |
| Tibouchina debilis (Cham.) Cogn. | Chaetogastra debilis Cham. |
| Tibouchina decemcostata Cogn. | Pleroma decemcostatum (Cogn.) P. J. F. Guim. & Michelang. |
| Tibouchina decora Gleason | Chaetogastra decora (Gleason) P.J.F. Guim. & Michelang. |
| Tibouchina dendroides Cogn. | Pleroma dendroides (Naud.) Triana |
| Tibouchina dimorphophylla Gleason | Chaetogastra dimorphylla (Gleason) P.J.F. Guim. & Michelang. |
| Tibouchina discolor Brade | Pleroma discolor (Brade) P. J. F. Guim. & Michelang. |
| Tibouchina divaricata Cogn. | Pleroma divaricatum (Cogn.) P. J. F. Guim. & Michelang. |
| Tibouchina dubia Cogn. | Pleroma dubium (Cham) P. J. F. Guim. & Michelang. |
| Tibouchina durangensis Standl. | Chaetogastra durangensis (Standl.) P.J.F. Guim. & Michelang. |
| Tibouchina dusenii Cogn. | Pleroma dusenii (Cogn.) P. J. F. Guim. & Michelang. |
| Tibouchina echinata (Ruiz & Pav.) Cogn. | Chaetogastra echinata (Ruiz et Pav.) DC. |
| Tibouchina eichleri Cogn. | Pleroma eichleri (Cogn.) P. J. F. Guim. & Michelang. |
| Tibouchina elegans (Gardner) Cogn. | Pleroma elegans Gardner |
| Tibouchina elegantula Todzia & Almeda | Andesanthus elegantulus (Todzia & Almeda) P.J.F.Guim.& Michelang. |
| Tibouchina erioclada (Triana) Cogn. | Chaetogastra erioclada (Triana) P.J.F. Guim. & Michelang. |
| Tibouchina estrellensis (Raddi) Cogn. | Pleroma estrellense (Raddi) P.J.F.Guim. & Michelang. |
| Tibouchina excoriata Cogn. | Chaetogastra excoriata (Cogn.) P.J.F. Guim. & Michelang. |
| Tibouchina ferrariana Cogn. | Chaetogastra ferrariana (Cogn.) P.J.F. Guim. & Michelang. |
| Tibouchina fissinervia Cogn. | Pleroma fissinervium (Schrank & Mart. ex DC.) Gardner |
| Tibouchina floribunda Cogn | Pleroma floribundum (Cogn.) P. J. F. Guim. & Michelang. |
| Tibouchina formosa Cogn. | Pleroma formosum (Cogn.) P. J. F. Guim. & Michelang. |
| Tibouchina fothergillae (DC.) Cogn. | Pleroma fothergillae (Schrank et Mat. ex DC.) Triana |
| Tibouchina foveolata Cogn. | Pleroma foveolatum (Naud.) Triana |
| Tibouchina francavillana Cogn. | Pleroma francavillanum (Cogn.) P. J. F. Guim. & Michelang. |
| Tibouchina frigidula (DC.) Cogn. | Pleroma frigidulum (Schrank et Mart. ex DC.) Triana |
| Tibouchina fulvipilis Cogn. | Chaetogastra fulvipilis (Cogn.) P.J.F. Guim. & Michelang. |
| Tibouchina galeottiana (Naudin) Cogn. | Chaetogastra galeottiana (Naudin) P.J.F. Guim. & Michelang. |
| Tibouchina gardneri (Naudin) Cogn. | Pleroma gardneri (Naud.) P. J. F. Guim. & Michelang. |
| Tibouchina gardneriana Cogn. | Pleroma echinatum Gardner |
| Tibouchina gaudichaudiana Baill. | Pleroma gaudichaudianum (DC.) A. Gray |
| Tibouchina gayana (Naudin) Cogn. | Chaetogastra gayana (Naudin) P.J.F. Guim. & Michelang. |
| Tibouchina geitneriana (Schltdl.) Cogn. | Chaetogastra geitneriana Schltdl. |
| Tibouchina gleasoniana Wurdack | Andesanthus gleasonianus (Wurdack) P.J.F.Guim. & Michelang. |
| Tibouchina goldenbergii F.S. Mey., P.J.F. Guim. & Kozera | Pleroma goldenbergii (F.S. Mey., P.J.F. Guim. & Kozera) P. J. F. Guim. & Michelang. |
| Tibouchina gracilis (Bonpl.) Cogn. | Chaetogastra gracilis DC. |
| Tibouchina granulosa (Desr.) Cogn. | Pleroma granulosum (Desr.) D. Don |
| Tibouchina grossa (L. f.) Cogn. | Chaetogastra grossa (L. f.) P.J.F. Guim. & Michelang. |
| Tibouchina hassleri Cogn. | Chaetogastra hassleri (Cogn.) P.J.F. Guim. & Michelang. |
| Tibouchina hatschbachii Wurdack | Pleroma hatschbachii (Wurdack) P. J. F. Guim. & Michelang. |
| Tibouchina herbacea (DC.) Cogn. | Chaetogastra herbacea (DC.) P.J.F. Guim. & Michelang. |
| Tibouchina herincquiana Cogn. | Chaetogastra herincquiana (Cogn.) P.J.F. Guim. & Michelang. |
| Tibouchina herzogii Cogn. | Chaetogastra herzogii (Cogn.) P.J.F. Guim. & Michelang. |
| Tibouchina heteromalla (D. Don) Cogn. | Pleroma heteromallum (D.Don) D.Don |
| Tibouchina hieracioides Cogn. | Chaetogastra hieracioides DC. |
| Tibouchina hintonii Gleason ex Todzia | Chaetogastra hintonii Gleason ex P.J.F. Guim. & Michelang. |
| Tibouchina hirsutissima Cogn. | Pleroma hirsutissimum (Cogn.) P. J. F. Guim. & Michelang. |
| Tibouchina hospita Cogn. | Pleroma hospitum (Schrank et Mart. ex DC.) Triana |
| Tibouchina hutchisonii Wurdack | Chaetogastra hutchisonii (Wurdack) P.J.F. Guim. & Michelang. |
| Tibouchina incarum Gleason | Chaetogastra incarum (Gleason) P.J.F. Guim. & Michelang. |
| Tibouchina inopinata Wurdack | Andesanthus inopinatus (Wurdack) P.J.F.Guim. & Michelang. |
| Tibouchina itatiaiae Cogn. | Pleroma itatiaiae (Wawra) P. J. F. Guim. & Michelang. |
| Tibouchina kingii Wurdack | Chaetogastra kingii (Wurdack) P.J.F. Guim. & Michelang. |
| Tibouchina kleinii Wurdack | Pleroma kleinii (Wurdack) P. J. F. Guim. & Michelang. |
| Tibouchina kuhlmannii Brade | Pleroma kuhlmannii (Brade) P. J. F. Guim. & Michelang. |
| Tibouchina kunhardtii Gleason | Chaetogastra kunhardtii (Gleason) P.J.F. Guim. & Michelang. |
| Tibouchina laevicaulis Wurdack | Pleroma laevicaule (Cogn. ex Wurdack) P. J. F. Guim. & Michelang. |
| Tibouchina laevis Cogn. | Chaetogastra laevis (Cogn.) P.J.F. Guim. & Michelang. |
| Tibouchina lanceolata Cogn. | Chaetogastra pauciflora P.J.F. Guim. & Michelang. |
| Tibouchina lancifolia Wurdack | Chaetogastra lancifolia (Wurdack) P.J.F. Guim. & Michelang. |
| Tibouchina langsdorffiana Baill. | Pleroma langsdorffianum (Bonpl.) Triana |
| Tibouchina latibracteolata P.G.Wilson | Chaetogastra latibracteolata (P.G.Wilson) P.J.F. Guim. & Michelang. |
| Tibouchina latifolia (Naudin) Cogn. | Chaetogastra latifolia (Naudin) P.J.F. Guim. & Michelang. |
| Tibouchina laxa (Desr.) Cogn. | Chaetogastra laxa (Desr.) P.J.F. Guim. & Michelang. |
| Tibouchina lepidota (Bonpl.) Baill. | Andesanthus lepidotus (Bonpl.) P.J.F.Guim. & Michelang. |
| Tibouchina lepidota var. congestiflora Bonpl. | Andesanthus lepidotus var. congestiflorus (Bonpl.) P.J.F.Guim. & Michelang. |
| Tibouchina lhotzkyana Cogn. | Pleroma lhotzkyana (C. Presl.) Triana |
| Tibouchina lilacina Cogn. | Pleroma lilacinum (Cogn.) P. J. F. Guim. & Michelang. |
| Tibouchina limae Brade | Pleroma limae (Brade) P. J. F. Guim. & Michelang. |
| Tibouchina lithophila Wurdack | Pleroma lithophilum (Wurdack) P. J. F. Guim. & Michelang. |
| Tibouchina longifolia (Vahl) Baill. | Chaetogastra longifolia (Vahl.) DC. |
| Tibouchina longipilosa Cogn. | Chaetogastra longipilosa (Cogn.) P.J.F. Guim. & Michelang. |
| Tibouchina longisepala Cogn. | Chaetogastra longisepala (Cogn.) P.J.F. Guim. & Michelang. |
| Tibouchina longistyla (Cogn.) S.S. Renner | Chaetogastra longistyla (Cogn.) P.J.F. Guim. & Michelang. |
| Tibouchina luetzelburgii Markgr. | Pleroma luetzelburgii (Markgr.) P. J. F. Guim. & Michelang. |
| Tibouchina lutzii Brade | Pleroma lutzii (Brade) P. J. F. Guim. & Michelang. |
| Tibouchina macrochiton Cogn. | Pleroma macrochiton (Mart. ex DC.) Triana |
| Tibouchina macvaughii Todzia | Chaetogastra macvaughii (Todzia) P.J.F. Guim. & Michelang. |
| Tibouchina manicata Cogn. | Pleroma manicatum (Cogn.) P. J. F. Guim. & Michelang. |
| Tibouchina mariae Wurdack | Chaetogastra mariae (Wurdack) P.J.F. Guim. & Michelang. |
| Tibouchina martialis (Cham.) Cogn. | Pleroma martiale (Cham.) Triana |
| Tibouchina martiusiana (DC.) Cogn. | Pleroma martiusianum (DC.) P. J. F. Guim. & Michelang. |
| Tibouchina marumbiensis Wurdack | Pleroma marumbiense (Wurdack) P. J. F. Guim. & Michelang. |
| Tibouchina maximiliana Baill. | Pleroma maximilianum (DC.) Triana |
| Tibouchina melanocalyx R. Romero, P.J.F. Guim. & Leoni | Pleroma melanocalyx (R.Romero, P.J.F.Guim. & Leoni) P. J. F. Guim. & Michelang. |
| Tibouchina mello-barretoi Brade | Pleroma mellobarretoi (Brade) P. J. F. Guim. & Michelang. |
| Tibouchina membranifolia Cogn. | Chaetogastra membranifolia (Cogn. & Rusby) P.J.F. Guim. & Michelang. |
| Tibouchina microphylla Cogn. | Pleroma microphyllum (Cogn. ex Schwacke) P. J. F. Guim. & Michelang. |
| Tibouchina minor Cogn. | Chaetogastra minor (Cogn.) P.J.F. Guim. & Michelang. |
| Tibouchina minutiflora Cogn. | Pleroma minutiflorum (Cogn.) P. J. F. Guim. & Michelang. |
| Tibouchina mollis (Bonpl.) Cogn. | Chaetogastra mollis (Bonpl.) DC. |
| Tibouchina monticola (Naudin) Cogn. | Chaetogastra monticola (Naudin) P.J.F. Guim. & Michelang. |
| Tibouchina mosenii Cogn. | Pleroma mosenii (Cogn.) P. J. F. Guim. & Michelang. |
| Tibouchina mouraei Cogn. | Pleroma mourae (Cogn.) P. J. F. Guim. & Michelang. |
| Tibouchina mutabilis (Vell.) Cogn. | Pleroma mutabile (Vell.) Triana |
| Tibouchina nanifolia Todzia | Chaetogastra nanifolia (Todzia) P.J.F. Guim. & Michelang. |
| Tibouchina narinoensis Wurdack | Andesanthus narinoensis (Wurdack) P.J.F.Guim. & Michelang. |
| Tibouchina naudiniana (Decne.) Cogn. | Chaetogastra naudiniana Decne. |
| Tibouchina nitida (Graham) Cogn. | Chaetogastra nitida (Graham) P.J.F. Guim. & Michelang. |
| Tibouchina noblickii Wurdack | Pleroma noblickii (Wurdack) P. J. F. Guim. & Michelang. |
| Tibouchina nodosa Wurdack | Pleroma nodosum (Wurdack ex Cogn.) P. J. F. Guim. & Michelang. |
| Tibouchina obtusifolia Cogn. | Chaetogastra obtusifolia (Cogn.) P.J.F. Guim. & Michelang. |
| Tibouchina ochypetala (Ruiz & Pav.) Baill. | Pleroma ochypetala (Ruiz et Pavon) D. Don |
| Tibouchina oligantha Gleason | Chaetogastra oligantha (Gleason) P.J.F. Guim. & Michelang. |
| Tibouchina orbignyana (Naudin) Cogn. | Chaetogastra orbignyana (Naudin) P.J.F. Guim. & Michelang. |
| Tibouchina oreophila Wurdack | Pleroma oreophilum (Wurdack) P. J. F. Guim. & Michelang. |
| Tibouchina ornata (Sw.) Baill. | Chaetogastra inconstans |
| Tibouchina oroensis Gleason | Chaetogastra oroensis (Gleason) P.J.F. Guim. & Michelang. |
| Tibouchina paleacea (Triana) Cogn. | Andesanthus paleaceus (Triana ex Mart.) P.J.F.Guim. & Michelang. |
| Tibouchina pallida Cogn. | Pleroma pallidum (Cogn.) P. J. F. Guim. & Michelang. |
| Tibouchina panicularis (Naudin) Britton ex Cogn. | Chaetogastra panicularis Naudin |
| Tibouchina paratropica (Griseb.) Cogn. | Chaetogastra paratropica (Griseb.) P.J.F. Guim. & Michelang. |
| Tibouchina parviflora Cogn. | Chaetogastra parviflora (Cogn.) P.J.F. Guim. & Michelang. |
| Tibouchina patens Todzia | Chaetogastra patens (Todzia) P.J.F. Guim. & Michelang. |
| Tibouchina pauloalvinii Vinha | Pleroma pauloalvinii (Vinha) P. J. F. Guim. & Michelang. |
| Tibouchina pendula Cogn. | Chaetogastra pendula (Cogn.) P.J.F. Guim. & Michelang. |
| Tibouchina pentamera (Ule) J.F. Macbr. | Chaetogastra pentamera (Ule) P.J.F. Guim. & Michelang. |
| Tibouchina pereirae Brade & Markgr. | Pleroma pereirae (Brade & Markgr.) P. J. F. Guim. & Michelang. |
| Tibouchina pilosa Cogn. | Pleroma pilosum (Cogn.) P. J. F. Guim. & Michelang. |
| Tibouchina pleromoides J.F. Macbr. | Chaetogastra pleromoides (Naudin) P.J.F. Guim. & Michelang. |
| Tibouchina pulcherrima Gleason | Chaetogastra pulcherrima (Gleason) P.J.F. Guim. & Michelang. |
| Tibouchina purpurascens Cogn. | Chaetogastra purpurascens (Cogn.) P.J.F. Guim. & Michelang. |
| Tibouchina purpusii Brandegee | Chaetogastra purpusii (Brandegee) P.J.F. Guim. & Michelang. |
| Tibouchina quartzophila Brade | Pleroma quartzophilum (Brade) P. J. F. Guim. & Michelang. |
| Tibouchina raddiana (DC.) Cogn. | Pleroma raddianum (DC.) Gardner |
| Tibouchina radula Markgr. | Pleroma radula (Markgr.) P. J. F. Guim. & Michelang. |
| Tibouchina ramboi Brade | Pleroma ramboi (Brade) P. J. F. Guim. & Michelang. |
| Tibouchina rediviva (Triana) Cogn. | Pleroma redivivum O.Berg ex Triana |
| Tibouchina regeliana Cogn. | Pleroma regelianum (Cogn.) P. J. F. Guim. & Michelang. |
| Tibouchina regnellii Cogn. | Pleroma andersregnellii P.J.F.Guim. & Michelang. |
| Tibouchina reitzii Brade | Pleroma reitzii (Brade) P. J. F. Guim. & Michelang. |
| Tibouchina repens Wurdack | Chaetogastra repens (Wurdack) P.J.F. Guim. & Michelang. |
| Tibouchina rhynchantherifolia Cogn. | Chaetogastra rhynchantherifolia (Cogn.) P.J.F. Guim. & Michelang. |
| Tibouchina riedeliana Cogn. | Pleroma riedelianum (Cogn.) P. J. F. Guim. & Michelang. |
| Tibouchina rigidula (Naudin) Wurdack | Pleroma rigidulum ((Naudin) Wurdack) P. J. F. Guim. & Michelang. |
| Tibouchina riparia Markgr. | Pleroma riparium (Markgr.) P. J. F. Guim. & Michelang. |
| Tibouchina robusta Cogn. | Pleroma robustm (Cogn.) P. J. F. Guim. & Michelang. |
| Tibouchina rojasii Cogn. | Chaetogastra rojasii (Cogn.) P.J.F. Guim. & Michelang. |
| Tibouchina roseotincta Todzia | Chaetogastra roseotincta (Todzia) P.J.F. Guim. & Michelang. |
| Tibouchina rubrobracteata R. Romero & P.J.F. Guim. | Pleroma rubrobracteatum (R.Romero & P.J.F.Guim.) P. J. F. Guim. & Michelang. |
| Tibouchina rufipilis (Schltdl.) Cogn. | Chaetogastra rufipilis (Schltdl.) Walp. |
| Tibouchina rupestris Cogn. | Chaetogastra rupestris (Cogn.) P.J.F. Guim. & Michelang. |
| Tibouchina rupicola Hoehne | Pleroma rupicola (Hoehne) P. J. F. Guim. & Michelang. |
| Tibouchina rusbyi Cogn. | Chaetogastra rusbyi (Cogn.) P.J.F. Guim. & Michelang. |
| Tibouchina salviifolia Cogn. | Pleroma salviaefolium (Cham.) Triana |
| Tibouchina sandiensis Wurdack | Chaetogastra sandiensis (Wurdack) P.J.F. Guim. & Michelang. |
| Tibouchina saxicola F.S. Mey., P.J.F. Guim. & R. Goldenb. | Chaetogastra saxicola (F.S.Mey., P.J.F.Guim. & R.Goldenb.) P.J.F. Guim. & Michelang. |
| Tibouchina saxosa Gleason | Chaetogastra saxosa (Gleason) P.J.F. Guim. & Michelang. |
| Tibouchina scaberrima Cogn. | Pleroma scaberrimum Triana |
| Tibouchina scabriuscula (Schltdl.) Cogn. | Chaetogastra scabriuscula (Schlecht.) P.J.F. Guim. & Michelang. |
| Tibouchina schenckii Cogn. | Pleroma schenckii (Cogn.) P. J. F. Guim. & Michelang. |
| Tibouchina schiedeana (Schltdl. & Cham.) Cogn. | Chaetogastra schiedeana (Schltdl. & Cham.) Walp. |
| Tibouchina schwackei Cogn. | Pleroma schwackei (Cogn.) P. J. F. Guim. & Michelang. |
| Tibouchina sebastianopolitana (Raddi) Cogn. | Chaetogastra sebastianapolitana (Raddi) P.J.F. Guim. & Michelang. |
| Tibouchina sellowiana (Cham.) Cogn. | Pleroma sellowianum (Cham) P. J. F. Guim. & Michelang. |
| Tibouchina semidecandra (Mart. & Schrank ex DC.) Cogn. | Pleroma semidecandrum (Schrank et Mart. ex DC.) Triana |
| Tibouchina sericea de Santiago | Chaetogastra sericea (de Santiago) P.J.F. Guim. & Michelang. |
| Tibouchina setoso-ciliata Cogn. | Pleroma setosociliatum (Cogn.) F.S.Mey. & F.B.Matos |
| Tibouchina silvestris Todzia & Almeda | Andesanthus silvestris (Todzia & Almeda) P.J.F.Guim.& Michelang. |
| Tibouchina simplicicaulis Cogn. | Chaetogastra simplicicaulis (Naudin) P.J.F. Guim. & Michelang. |
| Tibouchina sinaloensis Todzia | Chaetogastra sinaloensis (Todzia) P.J.F. Guim. & Michelang. |
| Tibouchina solmsii Cogn. | Chaetogastra solmsii (Cogn.) P.J.F. Guim. & Michelang. |
| Tibouchina stellipilis Wurdack | Pleroma stellipile (Wurdack) P. J. F. Guim. & Michelang. |
| Tibouchina stenocarpa (DC.) Cogn. | Pleroma stenocarpa (Schrank et Mart. ex DC.) Triana |
| Tibouchina stenopetala Cogn. | Chaetogastra stenopetala (Triana) P.J.F. Guim. & Michelang. |
| Tibouchina stenophylla Cogn. | Chaetogastra stenophylla (Cogn.) P.J.F. Guim. & Michelang. |
| Tibouchina stipulacea Vinha | Pleroma stipulaceum (Guimarães da Vinha) P. J. F. Guim. & Michelang. |
| Tibouchina strigosa (Rich.) Cogn | Chaetogastra strigosa (Rich.) DC |
| Tibouchina subglabra Wurdack | Pleroma subglabrum (Wurdack) P. J. F. Guim. & Michelang. |
| Tibouchina taperoensis Wurdack | Pleroma taperoense (Wurdack) P. J. F. Guim. & Michelang. |
| Tibouchina tedescoi Meirelles, L.Kollmann & R.Goldenb. | Pleroma tedescoi (Meirelles, L.Kollmann & R.Goldenb.) P.J.F. Guim. & Michelang. |
| Tibouchina tetrapetala Cogn. | Chaetogastra tetrapetala (Cogn.) P.J.F. Guim. & Michelang. |
| Tibouchina thereminiana Cogn. | Pleroma thereminianum (DC.) Triana |
| Tibouchina thulia Todzia | Chaetogastra thulia (Todzia) P.J.F. Guim. & Michelang. |
| Tibouchina tomentulosa Wurdack | Pleroma tomentulosum (Wurdack) P. J. F. Guim. & Michelang. |
| Tibouchina tortuosa (Bonpl.) Almeda | Chaetogastra tortuosa (Bonpl.) DC. |
| Tibouchina trichopoda (DC.) Baill. | Pleroma trichopodum DC. |
| Tibouchina triflora Gleason | Chaetogastra triflora (Gleason) P. J. F. Guim. & Michelang. |
| Tibouchina trinitensis Cogn. | Chaetogastra trinitensis (Cogn.) P.J.F. Guim. & Michelang. |
| Tibouchina tuberosa Cogn. | Pleroma tuberosum Gardner ex Triana |
| Tibouchina urbanii Cogn. | Chaetogastra urbanii (Cogn.) P.J.F. Guim. & Michelang. |
| Tibouchina urceolaris (Schrank & Mart. ex DC.) Cogn | Pleroma urceolare (Schrank & Mart. ex DC.) Triana |
| Tibouchina ursina (Cham.) Cogn. | Pleroma ursinum (Cham.) Triana |
| Tibouchina urvilleana (DC.) Cogn. | Pleroma urvilleanum (DC.) P.J.F.Guim. & Michelang. |
| Tibouchina velutina Cogn. | Pleroma velutinum (Naud.) Triana |
| Tibouchina venosa Gleason | Chaetogastra venosa (Gleason) P.J.F. Guim. & Michelang. |
| Tibouchina versicolor Cogn. | Chaetogastra versicolor (Lindl.) P.J.F. Guim. & Michelang. |
| Tibouchina villosissima Cogn. | Pleroma villosissimum Mart. ex.Triana |
| Tibouchina viminea Cogn. | Pleroma vimineum (D. Don) D. Don |
| Tibouchina violacea Cogn. | Chaetogastra violacea (Cogn.) P.J.F. Guim. & Michelang. |
| Tibouchina virgata Cogn. | Pleroma virgatum Gardner |
| Tibouchina wasshausenii Wurdack | Chaetogastra wasshausenii (Wurdack) P.J.F. Guim. & Michelang. |
| Tibouchina weberbaueri Cogn. | Chaetogastra weberbaueri (Cogn.) P.J.F. Guim. & Michelang. |
| Tibouchina wurdackii Almeda & Todzia | Andesanthus wurdackii (Almeda & Todzia) P.J.F.Guim. & Michelang. |
| Tibouchinopsis glutinosa Markgr. | Pleroma glutinosum (Markgr.) P. J. F. Guim. & Michelang. |
| Tibouchinopsis mirabilis Brade & Markgr. | Pleroma mirabile (Brade & Markgr.) P. J. F. Guim. & Michelang. |
| Tococa aristata Benth. | Miconia tocoaristata Michelang. |
| Tococa bolivarensis Gleason | Miconia canaimana Michelang. |
| Tococa broadwayi Urb. | Miconia broadwayii (Urb.) Michelang. |
| Tococa bullifera Mart. & Schrank ex DC. | Miconia bullifera (Mart. Ex. Schrank ex DC.) Michelang. |
| Tococa capitata Trail ex Cogn. | Miconia tococapitata Michelang. |
| Tococa caquetana Sprague | Miconia caquetana (Sprague) Michelang. |
| Tococa carolensis Gleason | Miconia carolensis (Gleason) Michelang. |
| Tococa caryophyllaea (DC.) S.S.Renner | Miconia caryophyllea (DC.) Triana |
| Tococa caudata Markgr. | Miconia tococaudata Michelang. |
| Tococa ciliata Triana | Miconia tocociliata Michelang. |
| Tococa cinnamomea | Miconia tococinnamomea Michelang. |
| Tococa cordata O.Berg ex Triana | Miconia tococordata Michelang. |
| Tococa coronata Benth. | Miconia tococoronata Michelang. |
| Tococa costoides Michelangeli | Miconia costoides (Michelang.) Michelang. |
| Tococa croatii Almeda | Miconia croatii (Almeda) Michelang. & Almeda |
| Tococa desiliens Gleason | Miconia desiliens (Gleason) Michelang. |
| Tococa erioneura (Cogn.) Wurdack | Miconia erioneura Cogn. |
| Tococa erythrophylla (Ule) Wurdack | Miconia erythrophylla Ule |
| Tococa filiformis (Gleason) Wurdack | Miconia filiformis (Gleason) Michelang. |
| Tococa gonoptera Gleason | Miconia gonoptera (Gleason) Michelang. |
| Tococa hirta O.Berg ex Triana | Miconia tocohirta Michelang. |
| Tococa lancifolia Spruce ex Triana | Miconia lancifolia (Spruce ex Triana) Michelang. |
| Tococa leticiana Michelangeli | Miconia leticiana (Michelang.) Michelang. |
| Tococa liesneri Wurdack | Miconia ronliesneri Michelang. |
| Tococa macrophysca Spruce ex Triana | Miconia macrophysca (Spruce ex Triana) Michelang. |
| Tococa macroptera Naudin | Miconia macroptera (Naudin) Michelang. |
| Tococa macrosperma Mart. | Miconia macrosperma (Mart) Michelang. |
| Tococa meridensis Wurdack | Miconia norandina Michelang. |
| Tococa nitens (Benth.) Triana | Miconia nitens Benth. |
| Tococa obovata Gleason | Miconia tocobovata Michelang. |
| Tococa oligantha Gleason | Miconia setimarginata Pittier |
| Tococa pachystachya Wurdack | Miconia pachystachya (Wurdack) Michelang. |
| Tococa pauciflora Spruce ex Triana | Miconia tocopauciflora Michelang. |
| Tococa perclara Wurdack | Miconia perclara (Wurdack) Michelang. |
| Tococa platyphylla Benth. | Miconia platyphylla (Benth.) L.O.Williams |
| Tococa quadrialata (Naudin) J.F.Macbr. | Miconia microphysca Michelang. |
| Tococa racemifera Wurdack | Miconia tocoracemifera Michelang. |
| Tococa raggiana Michelangeli | Miconia raggiana (Michelang.) Michelang. |
| Tococa rotundifolia (Triana) Wurdack | Miconia rubripetala Michelang. |
| Tococa setifera Pilg. | Miconia setifera (Pilg.) Michelang. |
| Tococa spadiciflora Triana | Miconia spadiciflora (Triana) Michelang. |
| Tococa stellata Gleason | Miconia stenoptera (Gleason) Michelang. |
| Tococa stephanotricha Naudin | Miconia stephanotricha (Naudin) Michelang. |
| Tococa subciliata (DC.) Triana | Miconia subciliata DC. |
| Tococa symphyandra (Triana) Cogn. | Miconia symphyadra Triana |
| Tococa tepuiensis Wurdack | Miconia tepuiensis (Wurdack) Michelang |
| Tococa undabunda J. F.Macbr. | Miconia undabunda (J. F. Macbr.) Michelang. |
| Topobea acuminata Wurdack | Blakea acuminata (Wurdack) Penneys & Judd |
| Topobea adscendens E.Cotton & Matezki | Blakea adscendens (E. Cotton & Matezki) Penneys & Judd |
| Topobea aeruginosa (Standl.) L.O.Williams | Blakea aeruginosa Standl. |
| Topobea albertiae Wurdack | Blakea albertiae (Wurdack) Penneys & Judd |
| Topobea alternifolia Gleason | Blakea alternifolia (Gleason) Gleason |
| Topobea amplifolia Almeda | Blakea amplifolia (Almeda) Penneys & Almeda |
| Topobea andreana Cogn. | Blakea pectinata Penneys, Phytoneuron 22: 4 |
| Topobea anisophylla Triana | Blakea anisophylla (Triana) Baill. |
| Topobea arboricola Almeda | Blakea arboricola (Almeda) Penneys & Almeda |
| Topobea asplundii Wurdack | Blakea asplundii (Wurdack) Penneys & Judd |
| Topobea barbata Gleason | Blakea barbata (Gleason) Penneys & Judd |
| Topobea brachyura (Gleason) Wurdack | Blakea brachyura Gleason |
| Topobea brenesii Standl. | Blakea brenesii (Standl.) Penneys & Almeda |
| Topobea brevibractea Gleason | Blakea brevibractea (Gleason) Penneys & Judd |
| Topobea bullata E.Cotton & Matezki | Blakea bullata (E.Cotton & Matezki) Penneys & Judd |
| Topobea calcarata L.Uribe | Blakea calcarata (L. Uribe) Penneys & Judd |
| Topobea caliginosa Almeda | Blakea micrantha Almeda |
| Topobea calophylla Almeda | Blakea calophylla (Almeda) Penneys & Almeda |
| Topobea calycularis Naudin | Blakea calycularis (Naudin) Penneys & Almeda |
| Topobea castanedae Wurdack | Blakea castanedae (Wurdack) Penneys & Judd |
| Topobea caudata Wurdack | Blakea horologica Penneys & Judd |
| Topobea ciliata Cogn. | Blakea ciliata Markgr. |
| Topobea cordata Gleason | Blakea cordata (Gleason) Penneys & Almeda |
| Topobea crassifolia (Almeda) Almeda | Blakea crassifolia Almeda |
| Topobea cutucuensis Wurdack | Blakea cutucuensis (L. Uribe) Penneys & Judd |
| Topobea dimorphophylla Almeda | Blakea dimorphophylla (Almeda) Penneys & Almeda |
| Topobea discolor Hochr. | Blakea discolor (Hochr.) Penneys & Judd, |
| Topobea dodsonorum Wurdack | Blakea dodsoniorum (Wurdack) Penneys & Almeda |
| Topobea eplingii Wurdack | Blakea eplingii (Wurdack) Penneys & Judd, |
| Topobea ferruginea Gleason | Blakea ferruginea (Gleason) Penneys & Judd |
| Topobea fragrantissima Almeda | Blakea fragrantissima (Almeda) Penneys & Almeda |
| Topobea gerardoana Almeda | Blakea gerardoana (Almeda) Penneys & Almeda |
| Topobea glaberrima Triana | Blakea glaberrima (Triana) Penneys & Judd |
| Topobea glabrescens Triana | Blakea cuprina Penneys & Judd |
| Topobea gracilis Triana | Blakea clavata Penneys & Judd |
| Topobea hexandra Almeda | Blakea hexandra (Almeda) Penneys & Almeda |
| Topobea induta Markgr. | Blakea induta (Markgr.) Penneys & Judd |
| Topobea inflata Triana | Blakea inflata (Triana) Penneys & Judd |
| Topobea insignis Triana | Blakea insignis (Triana) Penneys & Judd |
| Topobea intricata Almeda | Blakea intricata (Almeda) Penneys & Almeda |
| Topobea killipii Wurdack | Blakea killipii (Wurdack) Penneys & Judd |
| Topobea laevigata (D.Don) Naudin | Blakea laevigata D. Don |
| Topobea lentii Almeda | Blakea lentii (Almeda) Penneys & Almeda |
| Topobea longiloba Wurdack | Blakea longiloba (Wurdack) Penneys & Judd |
| Topobea longisepala Gleason | Blakea longisepala (Gleason) Penneys & Judd |
| Topobea macbrydei Wurdack | Blakea macbrydei (Wurdack) Penneys & Judd |
| Topobea maguirei Wurdack | Blakea maguirei (Wurdack) Penneys & Judd |
| Topobea maurofernandeziana Cogn. | Blakea maurofernandeziana (Cogn.) Penneys & Almeda |
| Topobea mcphersonii Almeda | Blakea mcphersonii (Almeda) Penneys & Almeda |
| Topobea micrantha Pittier | Miconia concinna Almeda |
| Topobea modica Wurdack | Blakea modica (Wurdack) Penneys & Judd |
| Topobea mortoniana Wurdack | Blakea mortoniana (Wurdack) Penneys & Judd |
| Topobea multiflora (D.Don) Triana | Blakea multiflora D.Don |
| Topobea muricata Lozano | Blakea muricata (Lozano) Penneys & Judd |
| Topobea parasitica Aubl. | Blakea parasitica (Aublet) D.Don |
| Topobea parvifolia (Gleason) Almeda | Blakea parvifolia Gleason |
| Topobea pascoensis Wurdack | Blakea pascoensis (Wurdack) Penneys & Judd |
| Topobea pittieri Cogn. | Blakea henripittieri Penneys & Almeda |
| Topobea pluvialis Standl. | Blakea pluvialis (Standl.) Penneys & Almeda |
| Topobea punctulata Triana | Blakea punctulata (Triana) Wurdack |
| Topobea rotundifolia (D.Don) Naudin | Blakea rotundifolia D.Don |
| Topobea sessilifolia Triana | Blakea sessilifolia (Triana) Penneys & Judd |
| Topobea setosa Triana | Blakea setosa (Triana) Penneys & Judd |
| Topobea standleyi L.O.Williams | Blakea standleyi (L.O.Williams) Penneys & Almeda |
| Topobea stephanochaeta Naudin | Blakea stephanochaeta (Naudin) Penneys & Judd |
| Topobea steyermarkii Wurdack | Blakea steyermarkii (Wurdack) Penneys & Judd |
| Topobea storkiii Standl. | Blakea storkii (Standl.) Almeda |
| Topobea suaveolens Almeda | Blakea suaveolens (Almeda) Penneys & Almeda |
| Topobea subbarbata Wurdack | Blakea subbarbata (Wurdack) Penneys & Judd |
| Topobea subscabrula Triana | Blakea subscabrula (Triana) Penneys & Judd |
| Topobea subsessiliflora Wurdack | Blakea subsessiliflora (Wurdack) Penneys & Judd |
| Topobea superba Naudin | Blakea superba (Naudin) Penneys & Judd |
| Topobea tetramera Almeda | Blakea tetramera (Almeda) Penneys & Almeda |
| Topobea tetroici Wurdack | Blakea tetroici (Wurdack) Penneys & Judd |
| Topobea toachiensis Wurdack | Blakea toachiensis (Wurdack) Penneys & Judd |
| Topobea trianaei Cogn. | Blakea trianae (Cogn.) Penneys & Judd |
| Topobea verrucosa Wurdack | Blakea verrucosa (Wurdack) Penneys & Judd |
| Topobea watsonii Cogn. | Blakea watsonii (Cogn.) Penneys & Almeda |

Table 5: Currently accepted species of New World Melastomataceae (as of October 7, 2020).

Acanthella pulchra Gleason

Acanthella sprucei Benth. & Hook. f.

Aciotis acuminifolia (Mart. ex DC.) Triana

Aciotis annua (Mart. ex DC.) Triana

Aciotis circaeifolia (Bonpl.) Triana

Aciotis ferreirana Brade

Aciotis indecora (Bonpl.) Triana

Aciotis olivieriana Freire-Fierro

Aciotis ornata (Miq.) Gleason

Aciotis paludosa (Mart. ex DC.) Triana

Aciotis polystachya (Bonpl.) Triana

Aciotis purpurascens (Aubl.) Triana

Aciotis rubricaulis (Mart. ex DC.) Triana

Aciotis viscida (Benth.) Freire-Fierro

Aciotis wurdackiana Freire-Fierro

Acisanthera alsinaefolia (DC.) Triana

Acisanthera ayangannae (Wurdack)M.J.R.Rocha&P.J.F.Guim.,

Acisanthera boliviensis Cogn. ex Kuntze

Acisanthera erecta J.St.-Hil.

Acisanthera fluitans Cogn.

Acisanthera paraguayensis (Hook. f.) Cogn.

Acisanthera uniflora (Vahl) Gleason

Acisanthera variabilis (DC.) Triana

Adelobotrys acreana Wurdack

Adelobotrys adscendens (Sw.) Triana

Adelobotrys atlantica Schulman

Adelobotrys ayangannensis Wurdack

Adelobotrys barbata Triana

Adelobotrys boissierianus Cogn.

Adelobotrys ciliatus (Naudin) Triana

Adelobotrys duidae (Gleason) Wurdack

Adelobotrys fruticosa Wurdack

Adelobotrys fuscescens Triana

Adelobotrys intonsus (Gleason) Wurdack

Adelobotrys jefensis Almeda

Adelobotrys klugii Wurdack

Adelobotrys latifolius Schulman

Adelobotrys linearifolius L. Uribe

Adelobotrys macrantha Gleason

Adelobotrys macrophyllus Pilg.

Adelobotrys marginatus Brade

Adelobotrys microcarpus Schulman

Adelobotrys monticola Gleason

Adelobotrys permixta Wurdack

Adelobotrys praetextus Pilg.

Adelobotrys rachidotrichia Brade

Adelobotrys rotundifolius Triana

Adelobotrys ruokolainenii Schulman

Adelobotrys saxosa Wurdack

Adelobotrys scandens (Aubl.) DC.

Adelobotrys spruceanus Cogn.

Adelobotrys stenophylla Wurdack

Adelobotrys subsessilis Gleason

Adelobotrys tessmannii Markgr.

Allomaieta caucana Lozano

Allomaieta ebejicosana Lozano

Allomaieta grandiflora Gleason

Allomaieta hirsuta (Gleason) Lozano

Allomaieta javierbarrigae H. Mend.

Allomaieta pancurana Lozano

Allomaieta strigosa (Gleason) Lozano

Allomaieta villosa (Gleason) Lozano

Allomaieta zenufanasana Lozano

Alloneuron glomeratum C. Ulloa & Michelang.

Alloneuron liron B. Walln.

Alloneuron majus (Markgr.) Markgr. ex J.F. Macbr.

Alloneuron ronliesneri B. Walln.

Alloneuron ulei Pilg.

Andesanthus aristeguietae (Wurdack) P.J.F.Guim. & Michelang.

Andesanthus elegantulus (Todzia & Almeda) P.J.F.Guim.& Michelang.

Andesanthus gleasonianus (Wurdack) P.J.F.Guim. & Michelang.

Andesanthus inopinatus (Wurdack) P.J.F.Guim. & Michelang.

Andesanthus lepidotus (Bonpl.) P.J.F.Guim. & Michelang.

Andesanthus narinoensis (Wurdack) P.J.F.Guim. & Michelang.

Andesanthus paleaceus (Triana ex Mart.) P.J.F.Guim. & Michelang.

Andesanthus silvestris (Todzia & Almeda) P.J.F.Guim.& Michelang.

Andesanthus wurdackii (Almeda & Todzia) P.J.F.Guim. & Michelang.

Appendicularia pullei (Gleason) M.J.R.Rocha & P.J.F.Guim

Appendicularia subglabra (Wurdack) M.J.R.Rocha & P.J.F.Guim.

Appendicularia thymifolia (Bonpl.) DC.

Arthrostemma alatum Triana

Arthrostemma ciliatum Pav. ex D. Don

Arthrostemma parvifolium Cogn.

Arthrostemma primaevum Almeda

Axinaea affinis (Naudin) Cogn.

Axinaea alata E. Cotton

Axinaea campii E. Cotton

Axinaea carolina-telleziae Bussmann & Paniagua

Axinaea colombiana Lozano & Alvear

Axinaea confusa E. Cotton

Axinaea costaricensis Cogn.

Axinaea crassinoda Triana

Axinaea dentata E. Cotton

Axinaea dependens Ruiz & Pav. ex D. Don

Axinaea disrupta E. Cotton

Axinaea fallax Gleason

Axinaea fernando-cabiesii Bussmann, J.A. Gruhn & A. Glenn

Axinaea flava E. Cotton, Bussmann & P. Lozano

Axinaea floribunda (Naudin) Triana

Axinaea glandulosa Ruiz & Pav. ex D. Don

Axinaea glauca E. Cotton & P. Lozano

Axinaea grandifolia (Naudin) Triana

Axinaea lanceolata Ruiz & Pav.

Axinaea lawessonii E. Cotton

Axinaea lehmannii Cogn.

Axinaea luteynii E. Cotton

Axinaea macrophylla (Naudin) Triana

Axinaea merianiae (DC.) Triana

Axinaea mertensioides Wurdack

Axinaea minutiflora E. Cotton

Axinaea nitida Cogn.

Axinaea oblongifolia (Cogn.) Wurdack

Axinaea pauciflora Cogn.

Axinaea pendula E. Cotton

Axinaea pennellii Gleason

Axinaea quitensis Benoist

Axinaea reginae Bussmann, J.A. Gruhn & A. Glenn

Axinaea ruizteranii Wurdack

Axinaea sclerophylla Triana

Axinaea scutigera Triana

Axinaea sessilifolia Triana

Axinaea sodiroi Wurdack

Axinaea tomentosa Cogn.

Axinaea weberbaueri Cogn.

Axinaea wurdackii Sagást., S.J. Arroyo & E. Rodr.

Bellucia acutata Pilg.

Bellucia aequiloba Pilg.

Bellucia arborescens (Aubl.) Baill.

Bellucia beckii S.S. Renner

Bellucia dichotoma Cogn.

Bellucia egensis (Mart. ex DC.) Penneys, Michelang., Judd & Almeda

Bellucia gracilis (S.S. Renner) Penneys, Michelang., Judd & Almeda

Bellucia grossularioides (L.) Triana

Bellucia huberi (Wurdack) S.S. Renner

Bellucia klugii (S.S. Renner) Penneys, Michelang., Judd & Almeda

Bellucia mespiloides (Miq.) J.F. Macbr.

Bellucia nigricans (Hook. f.) Penneys, Michelang., Judd & Almeda

Bellucia ovata (O. Berg ex Triana) Penneys, Michelang., Judd & Almeda

Bellucia pentamera Naudin

Bellucia riparia (S.S. Renner) Penneys, Michelang., Judd & Almeda

Bellucia spruceana (Benth. ex Triana) J.F. Macbr.

Bellucia strigosa (Gleason) Penneys, Michelang., Judd & Almeda

Bellucia subandina (Wurdack) Penneys, Michelang., Judd & Almeda

Bellucia subrotundifolia Wurdack

Bellucia umbellata Gleason

Bellucia villosa Lozano & L.M. Quiñones

Bellucia wurdackiana (S.S. Renner) Penneys, Michelang., Judd & Almeda

Bertolonia acuminata Gardner

Bertolonia alternifolia Baumgratz, Amorim & A. Jardim

Bertolonia angustifolia Cogn.

Bertolonia bullata Baumgratz, Amorim & A. B. Jardim

Bertolonia carmoi Baumgratz

Bertolonia cuspidata Bacci & Amorim

Bertolonia duasbocaensis Bacci & R. Goldenb.

Bertolonia formosa Brade

Bertolonia foveolata Brade

Bertolonia grazielae Baumgratz

Bertolonia hirsutissima Bacci, Michelang. & R. Goldenb.

Bertolonia hoehneana Baumgratz

Bertolonia igrapiuna Bisewski, Bacci & R. Goldenb.

Bertolonia kollmannii Bacci & R. Goldenb.

Bertolonia leuzeana (Bonpl.) DC.

Bertolonia linearifolia Bacci & Michelang.

Bertolonia lucernula Bacci, D.T. Iglesias & R. Goldenb.

Bertolonia macrocalyx Bacci & R. Goldenb.

Bertolonia maculata DC.

Bertolonia margaritacea Naudin

Bertolonia marmorata (Naudin) Naudin

Bertolonia michelangeliana Bacci & R. Goldenb.

Bertolonia mosenii Cogn.

Bertolonia nymphaeifolia Raddi

Bertolonia organensis Baumgratz, Silva-Gonçalves & Nunes-Freitas

Bertolonia paranaensis Baumgratz

Bertolonia reginatoi Bacci & Michelang.

Bertolonia riocontensis Bisewski, Bacci & R. Goldenb.,

Bertolonia ruschiana Bacci & R. Goldenb.

Bertolonia sanguinea Saldanha ex Cogn.

Bertolonia valenteana Baumgratz

Bertolonia venezuelensis Wurdack

Bertolonia violacea Bisewski, Bacci & R. Goldenb.,

Bertolonia vitoriana Bacci & Amorim

Bertolonia wurdackiana Baumgratz

Bisglaziovia behurioides Cogn.

Blakea acostae Wurdack

Blakea acuminata (Wurdack) Penneys & Judd

Blakea adscendens (E. Cotton & Matezki) Penneys & Judd

Blakea aeruginosa Standl.

Blakea albertiae (Wurdack) Penneys & Almeda

Blakea allotricha L. Uribe

Blakea alternifolia (Gleason) Gleason

Blakea amabilis (Linden) Cogn.

Blakea amplifolia (Almeda) Penneys & Almeda

Blakea andreana Cogn.

Blakea anisophylla (Triana) Baill.

Blakea anomala Donn. Sm.

Blakea arboricola (Almeda) Penneys & Almeda

Blakea argentea Gleason

Blakea asplundii (Wurdack) Penneys & Judd

Blakea attenboroughii Penneys & L. Jost

Blakea austin-smithii Standl.

Blakea barbata (Gleason) Penneys & Judd

Blakea bocatorena Kriebel & D. Santam.

Blakea brachyura Gleason

Blakea bracteata Gleason

Blakea brasiliensis Cogn.

Blakea brenesii (Standl.) Penneys & Almeda

Blakea brevibracteata (Gleason) Penneys & Judd

Blakea brunnea Gleason

Blakea bullata (E. Cotton & Matezki) Penneys & Judd

Blakea calcarata (L. Uribe) Penneys & Judd

Blakea calophylla (Almeda) Penneys & Almeda

Blakea calycosa Gleason

Blakea calycularis (Naudin) Penneys & Almeda

Blakea calyptrata Gleason

Blakea campii Wurdack

Blakea castanedae (Wurdack) Penneys & Judd

Blakea chlorantha Almeda

Blakea ciliata Markgr.

Blakea clavata Penneys & Judd

Blakea clusiifolia Gleason

Blakea coloradensis Almeda

Blakea cordata (Gleason) Penneys & Almeda

Blakea costaricensis Umaña & Almeda

Blakea crassifolia Almeda

Blakea crinita Gleason

Blakea cuatrecasasii Gleason

Blakea cuneata Standl.

Blakea cuprina Penneys & Judd

Blakea cutucuensis (Wurdack) Penneys & Judd

Blakea darcyana Almeda

Blakea dimorphophylla (Almeda) Penneys & Almeda

Blakea discolor (Hochr.) Penneys & Judd

Blakea dodsoniorum (Wurdack) Penneys & Almeda

Blakea droseripila Penneys

Blakea echinata Almeda & Penneys

Blakea elliptica (Gleason) Almeda

Blakea eplingii (Wurdack) Penneys & Judd

Blakea eriocalyx Wurdack

Blakea fasciculata Gleason

Blakea ferruginea (Gleason) Penneys & Judd

Blakea fissicalyx L. Uribe

Blakea florifera Gleason

Blakea foliacea Gleason

Blakea formicaria Wurdack

Blakea fragrantissima (Almeda) Penneys & Almeda

Blakea fuchsioides Almeda

Blakea gerardoana (Almeda) Penneys & Almeda

Blakea glaberrima (Triana) Penneys & Judd

Blakea glabrescens Benth.

Blakea glandulosa Gleason

Blakea gracilis Hemsl.

Blakea granatensis Naudin

Blakea grandiflora Hemsl.

Blakea gregii Almeda

Blakea grisebachii Cogn.

Blakea guatemalensis Donn. Sm.

Blakea hammelii Almeda

Blakea hammettiorum Almeda

Blakea harlingii Wurdack

Blakea henripittieri Penneys & Almeda

Blakea herrerae Almeda

Blakea hexandra (Almeda) Penneys & Almeda

Blakea hirsuta Berg ex Triana

Blakea hirsutissima (J.F. Macbr.) Wurdack

Blakea hispida Markgr.

Blakea holtonii Hochr.

Blakea horologica Penneys & Judd

Blakea hydraeformis Wurdack

Blakea incompta Markgr.

Blakea induta (Markgr.) Penneys & Judd

Blakea inflata (Triana) Penneys & Judd

Blakea insignis (Triana) Penneys & Judd

Blakea intricata (Almeda) Penneys & Almeda

Blakea involvens Markgr.

Blakea jativae Wurdack

Blakea killipii (Wurdack) Penneys & Judd

Blakea laevigata D. Don

Blakea lanuginosa Wurdack

Blakea latifolia (Ruiz & Pav.) D. Don

Blakea lentii (Almeda) Penneys & Almeda

Blakea lindeniana (Naudin) Triana

Blakea litoralis L.O. Williams

Blakea longibracteata Cogn.

Blakea longiloba (Wurdack) Penneys & Judd

Blakea longipes L. Uribe

Blakea longisepala (Gleason) Penneys & Judd

Blakea macbrydei (Wurdack) Penneys & Judd

Blakea madisonii Wurdack

Blakea maguirei (Wurdack) Penneys & Judd

Blakea maurofernandeziana (Cogn.) Penneys & Almeda

Blakea mcphersonii (Almeda) Penneys & Almeda

Blakea megaphylla Wurdack

Blakea mexiae Gleason

Blakea micrantha Almeda

Blakea modica (Wurdack) Penneys & Judd

Blakea monticola J.R. Johnst.

Blakea mortoniana (Wurdack) Penneys & Judd

Blakea multiflora D. Don

Blakea muricata (Lozano) Penneys & Judd

Blakea nangaritzana D. Fernández, C. Ulloa & Penneys

Blakea nareliana Bussmann

Blakea nodosa Wurdack

Blakea oldemanii Wurdack

Blakea orientalis Gleason

Blakea ovalis (Ruiz & Pav.) D. Don

Blakea paleacea Gleason

Blakea paludosa Gleason

Blakea parasitica (Aubl.) D. Don

Blakea parvifolia Gleason

Blakea pascoensis (Wurdack) Penneys & Judd

Blakea pauciflora Gleason

Blakea pectinata Penneys

Blakea penduliflora Almeda

Blakea perforata Almeda

Blakea pichinchensis Wurdack

Blakea pilosa Gleason

Blakea platypoda Gleason

Blakea pluvialis (Standl.) Penneys & Almeda

Blakea podagrica Triana

Blakea polyantha Wurdack

Blakea portentosa Wurdack

Blakea princeps (Linden ex Mast.) Cogn.

Blakea pulverulenta Vahl

Blakea punctulata (Triana) Wurdack

Blakea purpusii Brandegee

Blakea pyxidanthus Triana

Blakea quadrangularis Triana

Blakea quadriflora Gleason

Blakea repens (Ruiz & Pav.) D. Don

Blakea ricardoi Michelang. & D.Santam.

Blakea rosea (Ruiz & Pav.) D. Don

Blakea rostrata Berg ex Triana

Blakea rotundifolia D. Don

Blakea sawadae J.F. Macbr.

Blakea scarlatina Almeda

Blakea schlimii (Naudin) Triana

Blakea schultzei Markgr.

Blakea sessilifolia (Triana) Penneys & Judd

Blakea setosa (Triana) Penneys & Judd

Blakea spruceana Cogn.

Blakea squamigera L. Uribe

Blakea standleyana J.F. Macbr.

Blakea standleyi (L.O. Williams) Penneys & Almeda

Blakea stellaris Gleason

Blakea stephanochaeta (Naudin) Penneys & Judd

Blakea steyermarkii (Wurdack) Penneys & Judd

Blakea stipulacea Wurdack

Blakea storkii (Standl.) Almeda

Blakea suaveolens (Almeda) Penneys & Almeda

Blakea subbarbata (Wurdack) Penneys & Judd

Blakea subconnata O. Berg ex Triana

Blakea subpanduriformis E. Cotton & Matezki

Blakea subscabrula (Triana) Penneys & Judd

Blakea subsessiliflora (Wurdack) Penneys & Judd

Blakea subvaginata Wurdack

Blakea superba (Naudin) Penneys & Judd

Blakea tapantiana Umaña & Almeda

Blakea tetramera (Almeda) Penneys & Almeda

Blakea tetroici (Wurdack) Penneys & Judd

Blakea toachiensis (Wurdack) Penneys & Judd

Blakea trianae (Cogn.) Penneys & Judd

Blakea trinervia L.

Blakea truncata Gleason

Blakea tuberculata Donn. Sm.

Blakea unguiculata Almeda & Penneys

Blakea urbaniana Cogn.

Blakea vallensis Wurdack

Blakea venusta Kriebel, Almeda & A. Estrada

Blakea verrucosa (Wurdack) Penneys & Judd

Blakea villosa Cogn.

Blakea watsonii (Cogn.) Penneys & Almeda

Blakea wilburiana Almeda

Blakea wilsoniorum Almeda

Boyania ayangannae Wurdack

Boyania colombiana H. Mend.

Brachyotum alpinum Cogn.

Brachyotum andreanum Cogn.

Brachyotum angustifolium Wurdack

Brachyotum azuayense Wurdack

Brachyotum barbeyanum Cogn.

Brachyotum benthamianum Triana

Brachyotum campanulare (Bonpl.) Triana

Brachyotum campii Wurdack

Brachyotum cernuum (Bonpl.) Triana

Brachyotum cogniauxii Wurdack

Brachyotum confertum (Bonpl.) Triana

Brachyotum coronatum (Triana) Wurdack

Brachyotum cutervoanum Wurdack

Brachyotum ecuadorense Wurdack

Brachyotum fictum Wurdack

Brachyotum figueroae J.F. Macbr.

Brachyotum fraternum Wurdack

Brachyotum gleasonii Wurdack

Brachyotum gracilescens Triana

Brachyotum grisebachii Cogn.

Brachyotum harlingii Wurdack

Brachyotum huancavelicae Wurdack

Brachyotum incrassatum E. Cotton

Brachyotum intermedium Wurdack

Brachyotum jamesonii Triana

Brachyotum johannes-julii E. Cotton

Brachyotum ledifolium (Desr.) Triana

Brachyotum lindenii Cogn.

Brachyotum longisepalum Wurdack

Brachyotum lutescens (Ruiz & Pav.) Triana

Brachyotum lycopodioides Triana

Brachyotum lymphatum Wurdack

Brachyotum markgrafii Wurdack

Brachyotum maximowiczii Cogn.

Brachyotum microdon (Naudin) Triana

Brachyotum multinervium Wurdack

Brachyotum multituberculatum Wurdack

Brachyotum naudinii Triana

Brachyotum nutans Gleason

Brachyotum parvifolium Cogn.

Brachyotum quinquenerve (Ruiz & Pav.) Triana

Brachyotum radula Triana

Brachyotum rosmarinifolium (Ruiz & Pav.) Triana

Brachyotum rostratum (Naudin) Triana

Brachyotum rotundifolium Cogn.

Brachyotum rugosum Wurdack

Brachyotum russatum E. Cotton

Brachyotum sanguinolentum (Naudin) Triana

Brachyotum sertulatum C. Ulloa

Brachyotum strigosum (L. f.) Triana

Brachyotum trichocalyx Triana

Brachyotum tyrianthinum J.F. Macbr.

Brachyotum uribei Wurdack

Brachyotum virescens (Cogn.) Wurdack

Brachyotum weberbaueri Cogn.

Brasilianthus carajensis Almeda & Michelang.

Bucquetia glutinosa (L. f.) DC.

Bucquetia nigritella (Naudin) Triana

Bucquetia vernicosa Gleason

Cambessedesia angelana Fidanza & Almeda

Cambessedesia atropurpurea A.B. Martins

Cambessedesia cambessedesioides (Wurdack) A.B. Martins

Cambessedesia corymbosa Mart. & Schrank ex DC.

Cambessedesia eichleri Cogn.

Cambessedesia espora (A. St.-Hil. ex Bonpl.) DC.

Cambessedesia glaziovii Cogn. ex A.B. Martins

Cambessedesia gracilis Wurdack

Cambessedesia harleyi Wurdack

Cambessedesia hermogenesii A.B. Martins

Cambessedesia hilariana (Kunth) DC.

Cambessedesia latevenosa Mart. ex DC.

Cambessedesia membranacea Gardner

Cambessedesia pityrophylla (DC.) A.B. Martins

Cambessedesia purpurata Schrank & Mart. ex DC.

Cambessedesia regnelliana Cogn.

Cambessedesia rupestris A.B. Martins

Cambessedesia salviifolia (Cham.) A.B. Martins

Cambessedesia semidecandra A. St.-Hil. ex A.B. Martins

Cambessedesia striatella (Naudin) A.B. Martins

Cambessedesia tenuis Markgr.

Cambessedesia tiradentensis R.J.V. Alves, Rutter, R. A. & A.B. Martins

Cambessedesia uncinata Fidanza & Almeda

Cambessedesia weddellii Naudin

Cambessedesia wurdackii A.B. Martins

Castratella piloselloides Naudin

Castratella rosea Gleason

Centradenia floribunda Planch.

Centradenia grandifolia (Schltdl.) Endl.

Centradenia inaequilateralis (Schltdl. & Cham.) G. Don

Centradenia paradoxa (Kraenzl.) Almeda

Centradeniastrum album Gleason

Centradeniastrum roseum Cogn.

Centronia laurifolia D. Don

Centronia neblinae Wurdack

Centronia reticulata Triana

Centronia sessilifolia Cogn.

Centronia vaupesana Wurdack

Chaetogastra adenophora (Cogn.) P.J.F. Guim. & Michelang.

Chaetogastra alata P.J.F.Guim. & Michelang.

Chaetogastra almedae (Todzia) P.J.F. Guim. & Michelang.

Chaetogastra anderssonii (Wurdack) P.J.F. Guim. & Michelang.

Chaetogastra andreana (Cogn.) P.J.F. Guim. & Michelang.

Chaetogastra araneicalyx (de Santiago) P.J.F. Guim. & Michelang.

Chaetogastra arthrostemmoides (Cogn.) P.J.F. Guim. & Michelang.

Chaetogastra asperifolia (Cogn.) P.J.F. Guim. & Michelang.

Chaetogastra aurea (Cogn.) P.J.F. Guim. & Michelang.

Chaetogastra brittoniana (Cogn. ex Rusby) P.J.F. Guim. & Michelang.

Chaetogastra campii (Wurdack) P.J.F. Guim. & Michelang.

Chaetogastra capitata (Naudin) P.J.F. Guim. & Michelang.

Chaetogastra cerastifolia (Naudin) P.J.F. Guim. & Michelang.

Chaetogastra chamaecistus Sieber ex Grisebach

Chaetogastra chironioides Grisebach

Chaetogastra ciliaris DC.

Chaetogastra cisplatensis (Cogn.) P.J.F. Guim. & Michelang.

Chaetogastra cistoides Griseb.

Chaetogastra citrina (Naudin) P.J.F. Guim. & Michelang.

Chaetogastra clinopodifolia DC.

Chaetogastra confertiflora (Naudin) P.J.F. Guim. & Michelang.

Chaetogastra congestiflora (Todzia) P.J.F. Guim. & Michelang.

Chaetogastra connata (Gleason ex Todzia) P.J.F. Guim. & Michelang.

Chaetogastra cordeiroi F.S. Mey. & R. Goldenb.

Chaetogastra cornuta (Gleason) P.J.F. Guim. & Michelang.

Chaetogastra crassilfolia F.S.Mey. & R.Goldenb.

Chaetogastra cristaensis F.S.Mey. & R.Goldenb.

Chaetogastra debilis Cham.

Chaetogastra decora (Gleason) P.J.F. Guim. & Michelang.

Chaetogastra dimorphylla (Gleason) P.J.F. Guim. & Michelang.

Chaetogastra durangensis (Standl.) P.J.F. Guim. & Michelang.

Chaetogastra echinata (Ruiz et Pav.) DC.

Chaetogastra erioclada (Triana) P.J.F. Guim. & Michelang.

Chaetogastra excoriata (Cogn.) P.J.F. Guim. & Michelang.

Chaetogastra ferrariana (Cogn.) P.J.F. Guim. & Michelang.

Chaetogastra fulvipilis (Cogn.) P.J.F. Guim. & Michelang.

Chaetogastra galeottiana (Naudin) P.J.F. Guim. & Michelang.

Chaetogastra gayana (Naudin) P.J.F. Guim. & Michelang.

Chaetogastra geitneriana Schltdl.

Chaetogastra gracilis DC.

Chaetogastra grossa (L. f.) P.J.F. Guim. & Michelang.

Chaetogastra hassleri (Cogn.) P.J.F. Guim. & Michelang.

Chaetogastra herbacea (DC.) P.J.F. Guim. & Michelang.

Chaetogastra herincquiana (Cogn.) P.J.F. Guim. & Michelang.

Chaetogastra herzogii (Cogn.) P.J.F. Guim. & Michelang.

Chaetogastra hieracioides DC.

Chaetogastra hintonii Gleason ex P.J.F. Guim. & Michelang.

Chaetogastra hutchisonii (Wurdack) P.J.F. Guim. & Michelang.

Chaetogastra incarum (Gleason) P.J.F. Guim. & Michelang.

Chaetogastra inconstans (Vahl.) P. J. F. Guim. & Michelang.

Chaetogastra kingii (Wurdack) P.J.F. Guim. & Michelang.

Chaetogastra kunhardtii (Gleason) P.J.F. Guim. & Michelang.

Chaetogastra laevis (Cogn.) P.J.F. Guim. & Michelang.

Chaetogastra lancifolia (Wurdack) P.J.F. Guim. & Michelang.

Chaetogastra latibracteolata (P.G.Wilson) P.J.F. Guim. & Michelang.

Chaetogastra latifolia (Naudin) P.J.F. Guim. & Michelang.

Chaetogastra laxa (Desr.) P.J.F. Guim. & Michelang.

Chaetogastra longifolia (Vahl.) DC.

Chaetogastra longipilosa (Cogn.) P.J.F. Guim. & Michelang.

Chaetogastra longisepala (Cogn.) P.J.F. Guim. & Michelang.

Chaetogastra longistyla (Cogn.) P.J.F. Guim. & Michelang.

Chaetogastra macvaughii (Todzia) P.J.F. Guim. & Michelang.

Chaetogastra mariae (Wurdack) P.J.F. Guim. & Michelang.

Chaetogastra membranifolia (Cogn. & Rusby) P.J.F. Guim. & Michelang.

Chaetogastra minor (Cogn.) P.J.F. Guim. & Michelang.

Chaetogastra mollis (Bonpl.) DC.

Chaetogastra montana P.J.F. Guim. & Michelang.

Chaetogastra monticola (Naudin) P.J.F. Guim. & Michelang.

Chaetogastra nanifolia (Todzia) P.J.F. Guim. & Michelang.

Chaetogastra naudiniana Decne.

Chaetogastra nitida (Graham) P.J.F. Guim. & Michelang.

Chaetogastra obtusifolia (Cogn.) P.J.F. Guim. & Michelang.

Chaetogastra oligantha (Gleason) P.J.F. Guim. & Michelang.

Chaetogastra orbignyana (Naudin) P.J.F. Guim. & Michelang.

Chaetogastra oroensis (Gleason) P.J.F. Guim. & Michelang.

Chaetogastra panicularis Naudin

Chaetogastra paratropica (Griseb.) P.J.F. Guim. & Michelang.

Chaetogastra parviflora (Cogn.) P.J.F. Guim. & Michelang.

Chaetogastra patens (Todzia) P.J.F. Guim. & Michelang.

Chaetogastra pauciflora P.J.F. Guim. & Michelang.

Chaetogastra pendula (Cogn.) P.J.F. Guim. & Michelang.

Chaetogastra pentamera (Ule) P.J.F. Guim. & Michelang.

Chaetogastra pleromoides (Naudin) P.J.F. Guim. & Michelang.

Chaetogastra pulcherrima (Gleason) P.J.F. Guim. & Michelang.

Chaetogastra purpurascens (Cogn.) P.J.F. Guim. & Michelang.

Chaetogastra purpusii (Brandegee) P.J.F. Guim. & Michelang.

Chaetogastra repens (Wurdack) P.J.F. Guim. & Michelang.

Chaetogastra rhynchantherifolia (Cogn.) P.J.F. Guim. & Michelang.

Chaetogastra riograndensis F.S. Mey.

Chaetogastra rojasii (Cogn.) P.J.F. Guim. & Michelang.

Chaetogastra roseotincta (Todzia) P.J.F. Guim. & Michelang.

Chaetogastra rufipilis (Schltdl.) Walp.

Chaetogastra rupestris (Cogn.) P.J.F. Guim. & Michelang.

Chaetogastra rusbyi (Cogn.) P.J.F. Guim. & Michelang.

Chaetogastra sandiensis (Wurdack) P.J.F. Guim. & Michelang.

Chaetogastra saxicola (F.S.Mey., P.J.F.Guim. & R.Goldenb.) P.J.F. Guim. & Michelang.

Chaetogastra saxosa (Gleason) P.J.F. Guim. & Michelang.

Chaetogastra scabriuscula (Schlecht.) P.J.F. Guim. & Michelang.

Chaetogastra schiedeana (Schltdl. & Cham.) Walp.

Chaetogastra sebastianapolitana (Raddi) P.J.F. Guim. & Michelang.

Chaetogastra sericea (de Santiago) P.J.F. Guim. & Michelang.

Chaetogastra simplicicaulis (Naudin) P.J.F. Guim. & Michelang.

Chaetogastra sinaloensis (Todzia) P.J.F. Guim. & Michelang.

Chaetogastra solmsii (Cogn.) P.J.F. Guim. & Michelang.

Chaetogastra stenopetala (Triana) P.J.F. Guim. & Michelang.

Chaetogastra stenophylla (Cogn.) P.J.F. Guim. & Michelang.

Chaetogastra tetrapetala (Cogn.) P.J.F. Guim. & Michelang.

Chaetogastra thulia (Todzia) P.J.F. Guim. & Michelang.

Chaetogastra tortuosa (Bonpl.) DC.

Chaetogastra triflora (Gleason) P. J. F. Guim. & Michelang.

Chaetogastra trinitensis (Cogn.) P.J.F. Guim. & Michelang.

Chaetogastra urbanii (Cogn.) P.J.F. Guim. & Michelang.

Chaetogastra venosa (Gleason) P.J.F. Guim. & Michelang.

Chaetogastra versicolor (Lindl.) P.J.F. Guim. & Michelang.

Chaetogastra violacea (Cogn.) P.J.F. Guim. & Michelang.

Chaetogastra wasshausenii (Wurdack) P.J.F. Guim. & Michelang.

Chaetogastra weberbaueri (Cogn.) P.J.F. Guim. & Michelang.

Chaetolepis alpina Naudin

Chaetolepis anisandra Naudin

Chaetolepis cufodontisii Standl.

Chaetolepis lindeniana (Naudin) Triana

Chaetolepis loricarella Triana

Chaetolepis microphylla (Bonpl.) Miq.

Chaetolepis perijensis Wurdack

Chaetolepis phelpsiae Gleason

Chaetolepis santamartensis Wurdack

Chaetolepis sessilis Pittier

Chaetostoma albiflorum (Naudin) Koschnitzke & A.B. Martins

Chaetostoma armatum (Spreng.) Cogn.

Chaetostoma cupressinum (D. Don) Koschnitzke & A.B. Martins

Chaetostoma fastigiatum Naudin

Chaetostoma flavum Koschnitzke & A.B. Martins

Chaetostoma glaziovii Cogn.

Chaetostoma hexapetalum D. Nunes, D.O. Diniz, Koschnitzke & M.J. Silva

Chaetostoma inerme Naudin

Chaetostoma riedelianum Cogn.

Chaetostoma scoparia Cogn.

Chaetostoma selagineum (Naudin) Koschnitzke & A.B. Martins

Chaetostoma stenocladon (Naudin) Koschnitzke & A.B. Martins

Chalybea brevipedunculata Penneys, C. Ulloa & D. Fernández

Chalybea calyptrata (Penneys & M.E. Morales) Penneys & M.E. Morales

Chalybea corymbifera Naudin

Chalybea ecuadorensis (Wurdack) Penneys & M.E. Morales

Chalybea kirkbridei (Wurdack) M.E. Morales & Penneys

Chalybea macrocarpa (L. Uribe) M.E. Morales & Penneys

Chalybea minor (L. Uribe) M.E. Morales & Penneys

Chalybea mutisiana (L. Uribe) M.E. Morales & Penneys

Chalybea occidentalis (Lozano & N. Ruiz-R.) M.E. Morales & Penneys

Chalybea penduliflora (Wurdack) M.E. Morales & Penneys

Chalybea peruviana M.E. Morales & Penneys

Clidemia ferox Gleason

Clidemia minutiflora (Triana) Cogn.

Comolia anomala Pittier

Comolia berberifolia (Humb. & Bonpl.) DC.

Comolia bracteosa Huber

Comolia latifolia (Aubl.) Cogn.

Comolia leptophylla (Bonpl.) Naudin

Comolia microphylla Benth.

Comolia nummularioides (Bonpl.) Naudin

Comolia ovalifolia (DC.) Triana

Comolia prostrata Wurdack

Comolia serpyllacea Wurdack

Comolia sessilis (Spreng.) Triana

Comolia villosa (Aubl.) Triana

Comoliopsis coriacea (Gleason) M.J.R.Rocha & P.J.F.Guim.

Comoliopsis montana (Gleason) M.J.R.Rocha & P.J.F.Guim.

Comoliopsis neblinae Wurdack

Desmoscelis calcarata (Naudin) Triana

Desmoscelis villosa (Aubl.) Naudin

Dicrananthera hedyotoideae C.Presl.

Diolena boliviensis Cogn.

Eriocnema acaulis (Cham.) Triana

Ernestia adenotricha L. Uribe

Ernestia blackii Brade & Markgr.

Ernestia cataractae Tutin

Ernestia confertiflora Wurdack

Ernestia goudotii Triana

Ernestia granvillei Wurdack

Ernestia karuruana Wurdack

Ernestia lata Gleason

Ernestia maguirei Wurdack

Ernestia minor Gleason

Ernestia ovata Cogn.

Ernestia quadriseta O. Berg ex Triana

Ernestia rubra Pulle

Ernestia tenella (Bonpl.) DC.

Fritzschia anisostemon Cham.

Fritzschia atropurpurea D.Nunes, M.J.R.Rocha & P.J.F.Guim.

Fritzschia cordifolia R.Romero, D.Nunes & M.J.R.Rocha

Fritzschia edmundoi (Brade) M.J.R.Rocha & P.J.F.Guim.

Fritzschia erecta Cham.

Fritzschia furnensis R. Romero & M. J. Rocha

Fritzschia integrifolia Cham.

Fritzschia lanceiflora (DC.) M.J.R.Rocha & P.J.F.Guim.

Fritzschia rupestris R. Pacifico, Almeda & D. Nunes

Fritzschia sertularia (DC.) M.J.R.Rocha & P.J.F.Guim.

Fritzschia sessilis (Spreng.) M.J.R.Rocha & P.J.F.Guim.

Fritzschia stenodon (Triana) M.J.R.Rocha & P.J.F.Guim.

Graffenrieda anomala Triana

Graffenrieda barahonensis Urb.

Graffenrieda bella Almeda

Graffenrieda boliviensis Cogn.

Graffenrieda calyptrelloides Wurdack

Graffenrieda caryophyllea Triana

Graffenrieda caudata Wurdack

Graffenrieda chrysandra (Griseb.) Triana

Graffenrieda cinna J.F. Macbr.

Graffenrieda cinnoides Gleason

Graffenrieda colombiana Gleason

Graffenrieda conostegioides Triana

Graffenrieda cucullata (Triana) L.O. Williams

Graffenrieda emarginata (Ruiz & Pav.) Triana

Graffenrieda fantastica R.E. Schult. & L.B. Sm.

Graffenrieda foliosa Cogn.

Graffenrieda fruticosa Wurdack

Graffenrieda galeottii (Naudin) L.O. Williams

Graffenrieda gentlei Lundell

Graffenrieda glandulosa R. Goldenb. & Meirelles

Graffenrieda goldenbergii L.F. Lima, Baumgratz, Nic Lugh. & J.U. Santos

Graffenrieda gracilis (Triana) L.O. Williams

Graffenrieda grandifolia Gleason

Graffenrieda harlingii Wurdack

Graffenrieda hitchcockii Gleason

Graffenrieda intermedia Triana

Graffenrieda irwinii Wurdack

Graffenrieda jauana Wurdack

Graffenrieda jefensis Almeda, Alvear & H. Mend.

Graffenrieda kralii Wurdack

Graffenrieda laevicarpa Michelang. & R. Goldenb.

Graffenrieda lanceolata Gleason

Graffenrieda latifolia (Naudin) Triana

Graffenrieda laurina Triana

Graffenrieda limbata Triana

Graffenrieda maklenkensis H. Mend., Alvear & Almeda

Graffenrieda maturaca L.F. Lima, Baumgratz, Nic Lugh. & J.U. Santos

Graffenrieda meridensis Wurdack

Graffenrieda miconioides Naudin

Graffenrieda micrantha (Gleason) L.O. Williams

Graffenrieda moaensis Wurdack

Graffenrieda moritziana Triana

Graffenrieda obliqua Triana

Graffenrieda ottoschulzii (Urb. & Ekman) Urb. & Ekman

Graffenrieda patens Triana

Graffenrieda pedunculata Gleason

Graffenrieda penneysii Michelang. & C. Ulloa

Graffenrieda phoenicea Markgr.

Graffenrieda polymera Gleason

Graffenrieda reticulata Wurdack

Graffenrieda robusta (Cogn.) L.O. Williams

Graffenrieda rotundifolia (Bonpl.) DC.

Graffenrieda rufa Wurdack

Graffenrieda rufescens Britton & P. Wilson

Graffenrieda rupestris Ducke

Graffenrieda santamartensis Wurdack

Graffenrieda scandens (Gleason) Wurdack

Graffenrieda sessilifolia Triana

Graffenrieda sipapoana Wurdack

Graffenrieda steyermarkii Wurdack

Graffenrieda tamana Wurdack

Graffenrieda tricalcarata Gleason

Graffenrieda trichanthera Gleason

Graffenrieda tristis (Triana) L.O. Williams

Graffenrieda uribei Wurdack

Graffenrieda versicolor Gleason

Graffenrieda weddellii Naudin

Henriettea acunae (Alain) Alain

Henriettea aggregata (D. Don) J.F. Macbr.

Henriettea angustifolia O. Berg ex Triana

Henriettea barkeri (Urb. & Ekman) Alain

Henriettea boliviensis (Cogn.) Penneys, Michelang., Judd & Almeda

Henriettea bracteosa (Wurdack) Penneys, Michelang., Judd & Almeda

Henriettea caudata (Gleason) Penneys, Michelang., Judd & Almeda

Henriettea ciliata (Urb. & Ekman) Alain

Henriettea cuabae (Urb.) Borhidi

Henriettea cuneata (Standl.) L.O. Williams

Henriettea duckeana (Hoehne) Penneys, Michelang., Judd & Almeda

Henriettea ekmanii (Urb.) Alain

Henriettea fascicularis (Sw.) M. Gómez

Henriettea fissanthera (Gleason) Penneys, Michelang., Judd & Almeda

Henriettea flavescens (Aubl.) Baill.

Henriettea gibberosa (Urb.) Alain

Henriettea glabra (Vell.) Penneys, Michelang., Judd & Almeda

Henriettea gomesii Brade

Henriettea goudotiana (Naudin) Penneys, Michelang., Judd & Almeda

Henriettea granulata O. Berg & Triana

Henriettea heteroneura (Gleason) Penneys, Michelang., Judd & Almeda

Henriettea hondurensis (Wurdack) Penneys, Michelang., Judd & Almeda

Henriettea horridula Pilg.

Henriettea hotteana (Urb. & Ekman) Alain

Henriettea ininiensis (Wurdack) Penneys, Michelang., Judd & Almeda

Henriettea lasiostylis Pilg.

Henriettea lateriflora (Vahl) R.A. Howard & E.A. Kellogg

Henriettea lawrancei (Gleason) Penneys, Michelang., Judd & Almeda

Henriettea loretensis (Gleason) J.F. Macbr.

Henriettea lundellii (Wurdack) Penneys, Michelang., Judd & Almeda

Henriettea macfadyenii (Triana) Alain

Henriettea maguirei (Wurdack) Penneys, Michelang., Judd & Almeda

Henriettea manarae (Wurdack) Penneys, Michelangeli, Judd & Almeda

Henriettea maroniensis Sagot

Henriettea martiusii (DC.) Naudin

Henriettea megaloclada (Urb. & Ekman) Alain

Henriettea membranifolia (Cogn.) Alain

Henriettea mucronata (Gleason) S.S. Renner

Henriettea multiflora Naudin

Henriettea multigemma Carmenate & Michelang.

Henriettea odorata (Markgr.) Penneys, Michelang., Judd & Almeda

Henriettea ovata (Cogn.) Penneys, Michelang., Judd & Almeda

Henriettea patrisiana DC.

Henriettea prancei (Wurdack) Penneys, Michelang., Judd & Almeda

Henriettea punctata M. Gomez

Henriettea ramiflora (Sw.) DC.

Henriettea reflexa (Urb. & Ekman) Alain

Henriettea rimosa (Wurdack) Penneys, Michelang., Judd & Almeda

Henriettea saldanhaei Cogn.

Henriettea seemannii (Naudin) L.O. Williams

Henriettea sessilifolia (L.) Alain

Henriettea sierrae Carmenate & Bécquer

Henriettea spruceana Cogn.

Henriettea squamata (Alain) Alain

Henriettea squamulosa (Cogn.) Judd

Henriettea stellaris O. Berg ex Triana

Henriettea steyermarkii (Wurdack) Penneys, Michelang., Judd & Almeda

Henriettea strigosa Gleason

Henriettea succosa (Aubl.) DC.

Henriettea sylvestris (Gleason) J.F. Macbr.

Henriettea tachirensis (Wurdack) Penneys, Michelang., Judd & Almeda

Henriettea tobagensis (Wurdack) Penneys, Michelang., Judd & Almeda

Henriettea tovarensis (Cogn.) Penneys, Michelang., Judd & Almeda

Henriettea trachyphylla (Triana) Penneys, Michelang., Judd & Almeda

Henriettea triflora (Vahl) Alain

Henriettea tuberculosa (Donn. Sm.) L.O. Williams

Henriettea uniflora Judd, Skean & Penneys

Henriettea verrucosa (Triana) J.F. Macbr.

Henriettea williamii Brade

Henriettea williamsii (Pittier) Penneys, Michelangeli, Judd & Almeda

Heterocentron alatum Rose & Standl.

Heterocentron breedlovei (Wurdack) P.J.F. Guim. & Michelang.

Heterocentron chiapense (Wurdack) P.J.F. Guim. & Michelang.

Heterocentron chimalapanum Todzia

Heterocentron elegans (Schltdl.) Kuntze

Heterocentron evansii Almeda

Heterocentron glandulosum Schenk

Heterocentron hirtellum (Cogn.) L.O. Williams

Heterocentron laxiflorum Standl.

Heterocentron mexicanum Hook. & Arn.

Heterocentron muricatum Gleason

Heterocentron purpureum S. Winkl.

Heterocentron subtriplinervium (Link & Otto) A. Braun & C.D. Bouché

Heterocentron suffruticosum Brandegee

Huberia bradeana Bochorny & R.Goldenb.

Huberia capixaba (R.Goldenb. & Reginato) Bochorny & Michelang.

Huberia capixaba (R.Goldenb. & Reginato) Bochorny & Michelang.

Huberia carvalhoi Baumgratz

Huberia cogniauxii Baumgratz

Huberia consimilis Baumgratz

Huberia cordifolia (Cogn.) Bochorny & R.Goldenb.

Huberia corymbosa (Cogn.) Bochorny & R.Goldenb.

Huberia edmundoi (Brade) Bochorny & R.Goldenb.

Huberia espiritosantensis Baumgratz

Huberia glazioviana Cogn.

Huberia glutinosa (Cogn.) Bochorny & R.Goldenb.

Huberia hirsuta Bochorny & R.Goldenb.

Huberia huberioides (Brade) Bochorny & R.Goldenb.

Huberia insignis (Cham.) Bochorny & R.Goldenb.

Huberia kollmannii (R.Goldenb. & R.Tav.) Bochorny & Michelang.

Huberia laurina DC.

Huberia limae (Brade) Bochorny & R. Goldenb.

Huberia lumiarensis (Bochorny, Michelang. & R.Goldenb.) Bochorny

Huberia magdalenensis (Brade) Bochorny & R.Goldenb.

Huberia mestrealvarensis (D.T.Iglesias & R.Goldenb.) Bochorny & Michelang.

Huberia minor Cogn.

Huberia minutifolia Bochorny & R.Goldenb.

Huberia misteriosa Bochorny &. R. Goldenb.

Huberia mourae (Cogn.) Bochorny & R. Goldenb.

Huberia nettoana Brade

Huberia organensis (Saldanha & Cogn.) Bochorny & R.Goldenb.

Huberia ovalifolia DC.

Huberia parvifolia Cogn.

Huberia peruviana Cogn.

Huberia piranii Baumgratz

Huberia semiserrata DC.

Huberia sessilifolia R. Goldenb. & Michelang.

Huberia souzalimae (Brade) Bochorny & R.Goldenb.

Huberia staminodia Baumgratz

Huberia triplinervis Cogn.

Huberia weberbaueriana Baumgratz

Kirkbridea pentamera Wurdack

Kirkbridea tetramera Wurdack

Lavoisiera adamantium Pedersoli

Lavoisiera alba DC.

Lavoisiera angustifolia Cogn.

Lavoisiera arachnoidea Almeda & A.B. Martins

Lavoisiera belinelloi A.B. Martins & Almeda

Lavoisiera bradeana Barreto

Lavoisiera canastrensis Almeda & A.B. Martins

Lavoisiera caryophyllea Naudin

Lavoisiera chamaepitys Naudin

Lavoisiera cogniauxiana Barreto

Lavoisiera confertiflora Naudin

Lavoisiera cordata Cogn. ex Glaz.

Lavoisiera crassifolia DC.

Lavoisiera daviesiana Almeda & A.B. Martins

Lavoisiera firmula DC.

Lavoisiera gentianoides DC.

Lavoisiera glandulifera Naudin

Lavoisiera grandiflora Naudin

Lavoisiera harleyi Wurdack

Lavoisiera humilis Naudin

Lavoisiera imbricata DC.

Lavoisiera itambana DC.

Lavoisiera macrocarpa Naudin

Lavoisiera mello-barretoi Markgr.

Lavoisiera minima A.B. Martins & Almeda

Lavoisiera mucorifera DC.

Lavoisiera nervulosa Naudin

Lavoisiera pohliana O. Berg ex Arens

Lavoisiera pulchella Cham.

Lavoisiera pulcherrima DC.

Lavoisiera punctata DC.

Lavoisiera quinquenervis Wurdack

Lavoisiera rigida Cogn.

Lavoisiera rundeliana Almeda & A.B. Martins

Lavoisiera sampaioana Barreto

Lavoisiera scaberula Naudin

Lavoisiera senaei Schwacke

Lavoisiera setosa A.B. Martins & Almeda

Lavoisiera subulata Triana

Lavoisiera tetragona DC.

Lavoisiera vestita Almeda & A.B. Martins

Leiostegia vernicosa Benth.

Lithobium cordatum Bong.

Loricalepis atlantica Amorim, Michelang. & R.Goldenb.

Loricalepis duckei Brade

Macairea axilliflora Wurdack

Macairea cardonae Wurdack

Macairea chimantensis Wurdack

Macairea cuieirasii S.S. Renner

Macairea duidae Gleason

Macairea lanata Gleason

Macairea lasiophylla (Benth.) Wurdack

Macairea linearis Gleason

Macairea maroana Wurdack

Macairea multinervia Benth.

Macairea neblinae Wurdack

Macairea pachyphylla Benth.

Macairea parvifolia Benth.

Macairea philipsonii Renner

Macairea radula (Bonpl.) DC.

Macairea rigida Benth.

Macairea rufescens DC.

Macairea spruceana O. Berg ex Triana

Macairea stylosa Triana

Macairea sulcata Triana

Macairea theresiae Cogn.

Macairea thyrsiflora DC.

Macrocentrum andinum Michelang. & R. Goldenb.

Macrocentrum anfractum Wurdack

Macrocentrum angustifolium Gleason

Macrocentrum anychioides Gleason

Macrocentrum brevipedicellatum Wurdack

Macrocentrum chimantense Wurdack

Macrocentrum cristatum (DC.) Triana

Macrocentrum droseroides Triana

Macrocentrum fasciculatum (DC.) Triana

Macrocentrum fruticosum Gleason

Macrocentrum gesneriaceum Sandwith

Macrocentrum gracile Wurdack

Macrocentrum huberi Wurdack

Macrocentrum latifolium Wurdack

Macrocentrum longidens (Gleason) Wurdack

Macrocentrum maguirei Wurdack

Macrocentrum minus Gleason

Macrocentrum neblinae Wurdack

Macrocentrum parvulum Gleason

Macrocentrum repens (Gleason) Wurdack

Macrocentrum rubescens Gleason

Macrocentrum steyermarkii Wurdack

Macrocentrum stipulaceum Wurdack

Macrocentrum vestitum Sandwith

Macrocentrum yaracuyense Wurdack

Maguireanthus ayangannae Wurdack

Mallophyton chimantense Wurdack

Marcetia acerosa DC.

Marcetia alba Ule

Marcetia bahiana (Ule) A.B. Martins

Marcetia bahiensis (Brade & Markgr.) Wurdack

Marcetia bracteolaris Cogn.

Marcetia candolleana A.K.A. Santos & A.B. Martins

Marcetia canescens Naudin

Marcetia cardosoana A.K.A. Santos & A.B. Martins

Marcetia eimeariana A.B. Martins & Woodgyer

Marcetia ericoides (Spreng.) Cogn.

Marcetia formosa Wurdack

Marcetia grandiflora Markgr.

Marcetia harleyi Wurdack

Marcetia hatschbachii A.B. Martins

Marcetia lanuginosa Wurdack

Marcetia latifolia Naudin

Marcetia luetzelburgii Markgr.

Marcetia lychnophoroides A.B. Martins

Marcetia macrophylla Wurdack

Marcetia mucugensis Wurdack

Marcetia nervulosa Markgr.

Marcetia nummularia Markgr.

Marcetia oxycoccoides Wurdack & A.B. Martins

Marcetia paganuccii A.K.A. Santos & A.B. Martins

Marcetia semiriana A.B. Martins

Marcetia shepherdii A.B. Martins

Marcetia sincorensis Wurdack

Marcetia taxifolia (A. St.-Hil.) DC.

Marcetia velutina Markgr.

Marcetia viscida Wurdack

Meriania acida (Markgr.) Wurdack

Meriania acostae Wurdack

Meriania aguaditensis H. Mend. & Fern. Alonso

Meriania albertiae Wurdack

Meriania albiflora Carmenate & Michelang.

Meriania almedae Wurdack

Meriania amischophylla Wurdack

Meriania ampla Wurdack

Meriania amplexicaulis Wurdack

Meriania angustifolia (Cogn.) Carmenate & Michelang.

Meriania antioquiensis L. Uribe

Meriania aracaensis Wurdack

Meriania arborea (Naudin) Triana

Meriania ardyae D. Fernández & Dellinger

Meriania arizae H. Mend. & Fern. Alonso

Meriania aurata C. Ulloa, D. Fernández & D.A. Neill

Meriania axinioides Gleason

Meriania barbosae H. Mend., Alvear & Almeda

Meriania baumgratziana R. Goldenb. & Michelang.

Meriania boliviensis Cogn.

Meriania brachycera (Naudin) H. Mend. & Fern. Alonso

Meriania brevipedunculata Judd & Skean

Meriania brittoniana Wurdack

Meriania broccha Wurdack

Meriania calophylla (Cham.) Triana

Meriania calyptrata (Naudin) Triana

Meriania campii Wurdack

Meriania claussenii (Naudin) Triana

Meriania colombiana Gleason

Meriania compressicaulis Almeda & Penneys

Meriania cordifolia (H. Karst.) Triana

Meriania costata Wurdack

Meriania crassiramis (Naudin) Wurdack

Meriania cuneifolia Gleason

Meriania cuzcoana Wurdack

Meriania denticulata (Gleason) Wurdack

Meriania dimorphanthera Wurdack

Meriania drakei (Cogn.) Wurdack

Meriania ekmanii Urb.

Meriania excelsa (Gardner) Cogn.

Meriania fantastica Alvear, H. Mend. & Almeda

Meriania finicola Wurdack

Meriania franciscana C. Ulloa & Homeier

Meriania furvanthera Wurdack

Meriania glabra (DC.) Triana

Meriania glazioviana Cogn.

Meriania grandiflora (Standl.) Almeda

Meriania haemantha (Planch. & Lindl.) H. Mend. & Fern. Alonso

Meriania heptamera Lozano & Alvear

Meriania hernandi L. Uribe

Meriania hexamera Sprague

Meriania horrida C. Ulloa & Achá

Meriania hoyosii (Wurdack) Almeda & Penneys

Meriania huilensis Wurdack

Meriania inflata Michelang. & R. Goldenb.

Meriania involucrata (Desr.) Naudin

Meriania kirkbridei Wurdack

Meriania leucantha (Sw.) Sw.

Meriania longipes O. Berg ex Triana

Meriania loxensis Gleason

Meriania macrophylla (Benth.) Triana

Meriania maguirei Wurdack

Meriania maxima Markgr.

Meriania mexiae Wurdack

Meriania microflora Rob.Fernandez, R.Goldenb. & Michelang.

Meriania mutabilis (Gleason) H. Mend. & Fern. Alonso

Meriania mutisii (Bonpl.) H. Mend. & Fern. Alonso

Meriania neblinensis Wurdack

Meriania ninakurorum (Bussmann & Paniagua) E. Cotton & Balslev

Meriania nobilis Triana

Meriania odorata Almeda

Meriania ornata Wurdack

Meriania pallida Gleason

Meriania panamensis Gleason

Meriania paniculata (DC.) Triana

Meriania parvifolia Judd & Skean

Meriania pastazana Wurdack

Meriania peltata L. Uribe

Meriania phlomoides (Triana) Almeda

Meriania pichinchensis Wurdack

Meriania prunifolia D. Don

Meriania pulcherrima Herzog

Meriania purpurea (Sw.) Sw.

Meriania quintuplinervis Naudin

Meriania radula (Benth.) Triana

Meriania rigida (Benth.) Triana

Meriania robusta Cogn.

Meriania rubriflora Michelang. & R. Goldenb.

Meriania rugosa Markgr.

Meriania sanchezii R. Goldenb.

Meriania sanguinea Wurdack

Meriania sararensis H. Mend. & Fern. Alonso

Meriania sclerophylla Triana

Meriania selvaflorensis H. Mend.

Meriania silverstonei H. Mend. & Fern. Alonso

Meriania speciosa (Bonpl.) Naudin

Meriania splendens Triana

Meriania squamulosa Urb. & Ekman

Meriania stellata (Gleason) Wurdack

Meriania steyermarkii Gleason

Meriania subumbellata Cogn.

Meriania tetragona (Cogn.) Wurdack

Meriania tetramera Wurdack

Meriania tetraquetra Triana

Meriania tomentosa (Cogn.) Wurdack

Meriania urceolata Triana

Meriania vargasii Wurdack

Meriania versicolor L. Uribe

Meriania vilcabambensis Wurdack

Meriania weberbaueri J.F. Macbr.

Meriania yalconensis H. Mend. & Fern. Alonso

Meriania zunacensis D. Fernández & Dellinger

Merianthera bullata R. Goldenb., Fraga & A.P. Fontana

Merianthera burlemarxii Wurdack

Merianthera eburnea R. Goldenb. & Fraga

Merianthera parvifolia R. Goldenb., Fraga & A.P. Fontana

Merianthera pulchra Kuhlm.

Merianthera sipolisii (Glaz. & Cogn.) Wurdack

Merianthera verrucosa R. Goldenb., Fraga & A.P. Fontana

Miconia abbottii (Urb.) Ionta & Judd

Miconia abbreviata Markgr.

Miconia abeggii Urb. & Ekman

Miconia ablusa (Wurdack) Michelang.

Miconia abscondita Majure, Judd & Skean

Miconia abysmophila Wurdack

Miconia acalephoides Naudin

Miconia acanthocoryne Wurdack

Miconia acinodendron (L.) Sweet

Miconia acostae (Wurdack) Michelang.

Miconia acreana Ule

Miconia acuminata (Steud.) Naudin

Miconia acuminifera Triana

Miconia acuminoides Skean, Judd & Majure

Miconia acunae Borhidi

Miconia acunagalei Judd, Bécquer & Majure

Miconia acurensis (Wurdack) Michelang.

Miconia acutiflora (Naudin) R. Goldenb.

Miconia acutifolia Ule

Miconia acutilamina Michelang.

Miconia acutipetala Sprague

Miconia adamantinensis (Brade) R. Goldenb.

Miconia adenocalyx Urb. & Ekman

Miconia adenothrix (Cogn.) R. Goldenb.

Miconia adinantha Wurdack

Miconia adrieni J.F. Macbr.

Miconia adventitia Michelang.

Miconia aenigmatica Wurdack

Miconia aequatorialis Wurdack

Miconia aeruginosa Naudin

Miconia affinis DC.

Miconia aggregata Gleason

Miconia agrestis (Aubl.) Baill.

Miconia aguaclarensis (Wurdack) Michelang.

Miconia aguilarii (Kriebel & Almeda) Gamba & Almeda

Miconia aguirrei L. Uribe

Miconia aguitensis Gleason

Miconia alainii Judd & Skean

Miconia alata (Aubl.) DC.

Miconia alaticaulis Michelang.

Miconia alatiflora Michelang.

Miconia alatissima Gamba & Almeda

Miconia albertii Gleason

Miconia albertobrenesii Gamba & Almeda

Miconia albertsmithii Michelang.

Miconia albicans (Sw.) Steud.

Miconia albiviridis Urb. & Ekman

Miconia alboglandulosa Gamba & Almeda

Miconia alborosea L. Uribe

Miconia alborufescens Naudin

Miconia aligera Wurdack

Miconia aliquantula Wurdack

Miconia allardii (Wurdack) Michelang.

Miconia allenii (Almeda) Almeda

Miconia alloeotricha (Urb.) Judd, Penneys & Skean

Miconia almedae (Kriebel) Michelang.

Miconia alpestris Cogn.

Miconia alpina Cogn.

Miconia alternans Naudin

Miconia alternidomatia Michelang.

Miconia alternifolia (Griseb.) Alain

Miconia alternilamina Michelang.

Miconia alterninervia (Cogn.) R. Goldenb.

Miconia altissima Cogn.

Miconia altomacaensis (Baumgratz & D'El Rei Souza) R. Goldenb.

Miconia alypifolia Naudin

Miconia amabilis Cogn.

Miconia amacurensis Wurdack

Miconia amambayensis Kraenzl.

Miconia amapaensis R. Goldenb. & Hinoshita

Miconia amazonica Triana

Miconia amblyandra Naudin

Miconia amilcariana Almeda & Dorr

Miconia amissa Wurdack

Miconia amnicola Wurdack

Miconia amoena Triana

Miconia amorimii (Reginato & R. Goldenb.) R. Goldenb.

Miconia ampla Triana

Miconia amplexicaulis Naudin

Miconia amplilamina Michelang.

Miconia amplinodis Umaña & Almeda

Miconia amygdaloides (DC.) R. Goldenb.

Miconia anaectocalyx Michelang.

Miconia anchicayensis Gamba & Almeda

Miconia ancistrophora (C. Wright) Triana

Miconia andersonii Fawc. & Rendle

Miconia andreana Cogn.

Miconia androsaemifolia Griseb.

Miconia angelana R. Romero & R. Goldenb.

Miconia angulata (Griseb.) M. Gomez

Miconia angustidentata Almeda & Penneys

Miconia angustifolia (Sw.) Griseb.

Miconia angustilamina (Judd & Skean) Judd & Ionta

Miconia anisophylla Triana

Miconia anisotricha (Schltdl.) Triana

Miconia annulata (Naudin) Triana

Miconia anoriensis (L. Uribe) Michelang.

Miconia antillana Skean, Judd & Majure

Miconia antioquiensis Wurdack

Miconia aphanantha (Naudin) Michelang.

Miconia apiculata Urb. & Ekman

Miconia apleura (Urb. & Ekman) Judd & Bécquer

Miconia aplostachya (Bonpl.) DC.

Miconia aponeura Triana

Miconia appendiculata Triana

Miconia approximata Gamba & Almeda

Miconia aprica Gleason

Miconia aptera (DC.) R. Goldenb.

Miconia araguensis Wurdack

Miconia araneifera (Markgr.) Michelang. & R. Goldenb.

Miconia arboricola Almeda

Miconia arbutifolia Naudin

Miconia archeri Wurdack

Miconia argentea (Sw.) DC.

Miconia argentimuricata Majure & Judd

Miconia argyraea Cogn.

Miconia argyrophylla DC.

Miconia aristata Gleason

Miconia aristigera (Naudin) R. Goldenb. & Michelang.

Miconia ascendens Wurdack

Miconia ascenditricha Judd, Bécquer & Majure

Miconia asclepiadea Triana

Miconia aspera (Cogn.) R. Goldenb.

Miconia aspergillaris (Bonpl.) Naudin

Miconia asperifolia (Naudin) Majure & Judd

Miconia asperiuscula (DC.) R. Goldenb.

Miconia asperrima Triana

Miconia asplundii Wurdack

Miconia aspratilis Wurdack

Miconia astrocalyx Meirelles & R. Goldenb.

Miconia astroplocama Donn. Sm.

Miconia astrotricha (DC.) Triana

Miconia asymmetrica Michelang.

Miconia atlantica Caddah & R. Goldenb.

Miconia atrata (Spreng.) Wawra

Miconia atrofusca Cogn.

Miconia atropilis Cogn. & Gleason

Miconia atropurpurea Gamba & Almeda

Miconia atroviridis (Cogn.) R. Goldenb.

Miconia attenuatifolia Michelang.

Miconia augustgrisebachii Ionta & Judd

Miconia augusti Cogn.

Miconia augustkappleri Michelang.

Miconia aulocalyx Mart. ex Triana

Miconia aurantiaca (Almeda & Kriebel) Gamba & Almeda

Miconia aurantipetala Michelang.

Miconia aurea (D. Don) Naudin

Miconia aureoides Cogn.

Miconia auricoma (Spring ex Mart.) R. Goldenb.

Miconia aurifolia Bécquer & Judd

Miconia auritinoda Wurdack

Miconia australis (Cham.) R. Goldenb.

Miconia avia Wurdack

Miconia axillaris (Macfad.) Skean, Judd & Majure

Miconia axinaeoides Gleason

Miconia ayacuchensis Wurdack

Miconia ayangannensis (Wurdack) Michelang.

Miconia ayisyena Skean, Judd & Majure

Miconia aymardii Wurdack

Miconia badilloi Michelang.

Miconia bahiana R.Goldenb. & J.Coelho

Miconia bahorucensis Skean, Judd & Majure

Miconia bailloniana J.F. Macbr.

Miconia baillonii M. Gómez

Miconia bairdiana (Skean, Judd, Clase & Peguero) Skean & Judd

Miconia balansae (Cogn.) R. Goldenb.

Miconia balbisiana (Ser. ex DC.) Michelang.

Miconia bangii Cogn.

Miconia baracoana M. Gómez

Miconia baracoensis Urb.

Miconia barahonensis (Urb. & Ekman) Ionta & Judd

Miconia barbata (Borhidi) Judd, Bécquer & Majure

Miconia barbeyana Cogn.

Miconia barbinervis (Benth.) Triana

Miconia barbipetiolata Michelang.

Miconia barbipilis Gleason

Miconia barclayana Wurdack

Miconia barkeri Urb. & Ekman

Miconia barkleyi (Wurdack) Michelang.

Miconia basilensis Urb. & Ekman

Miconia baumgratziana R. Goldenb. & C.V. Martin

Miconia bella Wurdack

Miconia beneolens Wurdack

Miconia benoistii Wurdack

Miconia bensparrei Gamba & Almeda

Miconia benthamiana Triana

Miconia benthamii (Naudin) Michelang.

Miconia bernardii Wurdack

Miconia berteroi (DC.) Judd & Ionta

Miconia biacuta Cogn.

Miconia biappendiculata (Naudin) L. Uribe

Miconia bicolor (Mill.) Triana

Miconia biflora (Cogn.) Judd

Miconia biformis Cogn.

Miconia bigibbosa (Cogn.) Michelang.

Miconia biglandulosa Gleason

Miconia biglomerata (Bonpl.) DC.

Miconia bilopezii Wurdack

Miconia biolleyana (Cogn.) Gamba & Almeda

Miconia bipatrialis Wurdack

Miconia biperulifera Cogn.

Miconia birimosa (Naudin) Skean, Judd & Majure

Miconia bisecundiflora Ocampo & Almeda

Miconia biserrata (DC.) Michelang.

Miconia bissei (Bécquer) Bécquer & Michelang.

Miconia bisulcata Urb.

Miconia blakeifolia Gleason

Miconia blancheana Urb.

Miconia blepharodes (DC.) R. Goldenb.

Miconia boekei (Wurdack) Gamba & Almeda

Miconia bolivarensis Wurdack

Miconia boliviensis Cogn.

Miconia boomii Wurdack

Miconia bordoncilloana Lozano & M.E. Morales

Miconia borhidiana Judd, Bécquer & Majure

Miconia borinquensis Skean, Judd & Majure

Miconia borjensis Wurdack

Miconia brachyanthera Triana

Miconia brachybotrya Triana

Miconia brachycalyx Triana

Miconia brachycentra (Griseb.) M. Gómez

Miconia brachygyna Gleason

Miconia brachyloba (Urb.) Bécquer

Miconia brachystemon (Urb.) Judd, Bécquer & Majure

Miconia brackenridgei (A. Gray) R. Goldenb.

Miconia bracteata (DC.) Triana

Miconia bracteolata (Bonpl.) DC.

Miconia bracteosa (Naudin) Michelang.

Miconia bractiflora Gamba & Almeda

Miconia bradeana Baumgratz & R. Goldenb.

Miconia brasiliensis Triana

Miconia brenesii Standl.

Miconia breteleri Wurdack

Miconia breviflora (Cogn.) R. Goldenb.

Miconia brevifolia (Urb. & Ekman) Skean & Judd

Miconia brevipes Benth.

Miconia brevis J.F. Macbr.

Miconia brevistylis Cogn.

Miconia brevitheca Gleason

Miconia brigitteae H. Mend. & Posada-Herrera

Miconia brittonii Cogn.

Miconia broadwayi (Urb.) Michelang.

Miconia brunescens (Urb.) Bécquer & Skean

Miconia brunnea Mart. ex DC.

Miconia bubalina (D. Don) Naudin

Miconia bucherae Alain

Miconia buddlejoides Triana

Miconia bullata (Turcz.) Triana

Miconia bullatifolia Michelang.

Miconia bullifera (Mart. & Schrank ex DC.) Michelang.

Miconia bullosa (DC.) Michelang.

Miconia bullotricha Bécquer & Majure

Miconia buntingii Wurdack

Miconia burchellii Triana

Miconia buxifolia Naudin

Miconia cabraliensis (Wurdack) R. Goldenb.

Miconia cabucu Hoehne

Miconia cacatin (Aubl.) S.S. Renner

Miconia cacumina Wurdack

Miconia caelata (Bonpl.) DC.

Miconia caelestis (Standl.) Michelang.

Miconia caerulea (Pav. ex D. Don) Naudin

Miconia caesariata Wurdack

Miconia caesia Cogn. & Gleason

Miconia caiuia E.C.O. Chagas & R. Goldenb.

Miconia cajalbanensis Judd, Bécquer & Majure

Miconia cajanumana Wurdack

Miconia calignosa Wurdack

Miconia calocoma Almeda

Miconia calvescens DC.

Miconia calycina Cogn.

Miconia calycopteris (Rich.) Judd, Bécquer & Majure

Miconia campanensis Urb. & Ekman

Miconia campestris (Benth.) Triana

Miconia campii Wurdack

Miconia camporum (Brade) R. Goldenb.

Miconia canaguensis Wurdack

Miconia canaimana Michelang.

Miconia cancellata (Cogn.) R. Goldenb.

Miconia candelabrum (J.F. Macbr.) R. Goldenb.

Miconia cannabina Markgr.

Miconia canoi Michelang. & D.F. Paredes

Miconia capillaris (Sw.) M. Gomez

Miconia capilliflora (Naudin) R. Goldenb.

Miconia capillinervis Ionta & Judd

Miconia capillipes (Triana) Michelang.

Miconia capitellata Cogn.

Miconia capixaba R. Goldenb.

Miconia caquetana (Sprague) Michelang.

Miconia caquetensis (Gleason) Ocampo & Almeda

Miconia carassana Cogn.

Miconia cardenasiae Jan. M. Burke & Michelang.

Miconia carnea Cogn.

Miconia carolensis (Gleason) Michelang.

Miconia carpishana Wurdack

Miconia caryophyllaea (DC.) Triana

Miconia castaneiflora Naudin

Miconia castillensis Wurdack

Miconia castrensis Wurdack

Miconia cataractae Triana

Miconia catharinensis (Cogn.) R. Goldenb.

Miconia caucana Gleason

Miconia caudata (Bonpl.) DC.

Miconia caudatifolia Michelang.

Miconia caudiculata Pittier

Miconia caudigera DC.

Miconia cauingia J.F. Macbr.

Miconia cautis Wurdack

Miconia cava Michelang. & R. Goldenb.

Miconia cazaletii Wurdack

Miconia celaquensis Almeda

Miconia centrodesma Naudin

Miconia centrodesmoides Wurdack

Miconia centronioides Gleason

Miconia centrophora Naudin

Miconia centrosperma Almeda

Miconia cephaloides Michelang.

Miconia ceramicarpa (DC.) Cogn.

Miconia cerasiflora Urb.

Miconia cercophora Wurdack

Miconia cernua Naudin

Miconia cernuiflora Jan. M. Burke & Michelang.

Miconia chaetocalyx (A. Gray) R. Goldenb.

Miconia chaetodon Naudin

Miconia chaetodonta R. Goldenb. & Michelang.

Miconia chamissois Naudin

Miconia chapensis E. Cotton & W. Meier

Miconia charadrophila (Tutin) Michelang.

Miconia charleswrightii Bécquer & Judd

Miconia chartacea Triana

Miconia chemillensis L.A. Cárdenas

Miconia chichirivichensis Michelang.

Miconia chimantensis (Wurdack) Michelang.

Miconia chinantlana (Naudin) Almeda

Miconia chionophila Naudin

Miconia chiriquiensis Almeda

Miconia chlorocarpa Cogn.

Miconia chocoensis (Wurdack) Gamba & Almeda

Miconia choriophylla Wurdack

Miconia christophoriana (Ham.) DC

Miconia chrysocoma Gleason

Miconia chrysoneura Triana

Miconia chrysophylla (Rich.) Urb.

Miconia ciliaris Triana

Miconia ciliata (Rich.) DC.

Miconia ciliolata (Cogn.) R. Goldenb.

Miconia cinchonifolia DC.

Miconia cineana Majure, Judd, Ionta & Skean

Miconia cinerascens Miq.

Miconia cinerea Cogn.

Miconia cinereiformis Ionta, Judd & Skean

Miconia cinnabarina Jan. M. Burke & Michelang.

Miconia cinnamomea Beurl.

Miconia cinnamomifolia (DC.) Naudin

Miconia cionotricha L. Uribe

Miconia cipoensis R. Goldenb.

Miconia circumscissa (Cogn.) R. Goldenb.

Miconia cladonia Gleason

Miconia clandestina (Almeda) Almeda

Miconia clasei Majure, Skean & Judd

Miconia clathrantha Triana ex Cogn.

Miconia cleefii L. Uribe

Miconia clementiana (Britton) Bécquer & Majure

Miconia clementii (P. Wilson) Bécquer

Miconia clivorum Wurdack

Miconia clypeata Wurdack

Miconia coadunata (Wurdack) R. Goldenb.

Miconia coarctiflora (Wurdack) Ocampo & Almeda

Miconia coccinea (Rich.) Judd & Skean

Miconia cocoensis Almeda & Kriebel

Miconia codonostigma Gleason & Wurdack

Miconia coelestis (Pav. ex D. Don) Naudin

Miconia cogniauxii (Glaz. ex D'El Rei Souza) R. Goldenb.

Miconia collatata Wurdack

Miconia collayensis Wurdack

Miconia colliculosa Almeda

Miconia coloradensis Almeda

Miconia commutata Almeda

Miconia comosa Cogn.

Miconia complanata Jan. M. Burke, Michelang. & D. Fernández

Miconia compressa Naudin

Miconia compressicaulis Wurdack

Miconia comptifolia Wurdack

Miconia concinna Almeda

Miconia condylata Wurdack

Miconia confertiflora Almeda

Miconia conformis Wurdack

Miconia conglomerata (DC.) Michelang.

Miconia conica Skean, Judd & Majure

Miconia coniophora Urb. & Ekman

Miconia conoapiculata Michelang.

Miconia conoattenuata Michelang.

Miconia conobracteata Michelang.

Miconia conobrenesii Michelang.

Miconia conocentronioides Michelang.

Miconia conochiriquensis Michelang.

Miconia conocuatrecasii Michelang.

Miconia conodentata Michelang.

Miconia conohirtella Michelang.

Miconia conolancifolia Michelang.

Miconia conomacrantha Michelang.

Miconia conomicrantha Michelang.

Miconia conoplumosa Michelang.

Miconia conorubiginosa Michelang.

Miconia conorufescens Michelang.

Miconia conosetifera Michelang.

Miconia conosetosa Michelang.

Miconia conospeciosa Michelang.

Miconia contrerasii Wurdack

Miconia cookii Gleason

Miconia cooperi (Cogn.) Michelang.

Miconia corallina Spring

Miconia corazonica Wurdack

Miconia corcovadensis (Raddi) R. Goldenb.

Miconia cordata Triana

Miconia cordifolia Wurdack

Miconia cordigera (Triana) R. Goldenb.

Miconia cordilamina Judd & Bécquer

Miconia coriacea (Sw.) DC.

Miconia cornifera Humberto Mend., Posada-Herrera & Heriberto David

Miconia cornifolia (Desr.) Naudin

Miconia cornoides (Schltdl. & Cham.) Almeda

Miconia cornuta (Lozano & N. Ruiz-R.) Almeda & Alvear

Miconia coronata (Bonpl.) DC.

Miconia coronifera Wurdack

Miconia correae Almeda

Miconia corymbiformis Cogn.

Miconia corymbosa (Rich.) Judd & Skean

Miconia cosangensis Wurdack

Miconia costaricensis Cogn.

Miconia costata (Urb.) Judd, Bécquer & Majure

Miconia costoides (Michelang.) Michelang.

Miconia cottoniana Michelang.

Miconia cowanii Wurdack

Miconia crassifolia Triana

Miconia crassinervia Cogn.

Miconia crassinervis (Urb.) Skean, Judd & Majure

Miconia crassipes Triana

Miconia crassistigma Cogn.

Miconia crebribullata Wurdack

Miconia cremadena Gleason

Miconia cremersii (Wurdack) Ocampo & Almeda

Miconia cremophylla Naudin

Miconia crenata (Vahl) Michelang.

Miconia crenulata (Gleason) Michelang.

Miconia cretacea Gleason

Miconia crinita Naudin

Miconia cristalensis (Borhidi) Judd, Bécquer & Majure

Miconia cristata (Reginato & R. Goldenb.) R. Goldenb.

Miconia croatii (Almeda) Michelang. & Almeda

Miconia crocata Almeda

Miconia crocea (Desr.) Naudin

Miconia crocina Michelang.

Miconia crossosepala (Griseb.) Michelang.

Miconia crotonifolia (Desr.) Judd & Ionta

Miconia cruenta Triana

Miconia cuatrecasasii Markgr.

Miconia cubacinerea Majure & Judd

Miconia cubana (Alain) Majure & Judd

Miconia cubatanensis Hoehne

Miconia cubensis (C. Wright ex Griseb.) C. Wright

Miconia cucullata (Gleason) Michelang.

Miconia cundinamarcensis Wurdack

Miconia cuneata Triana ex Cogn.

Miconia cuneatissima R. Goldenb. & Michelang.

Miconia cupeyalensis Bécquer & Michelang.

Miconia cuprea Wurdack

Miconia cursoris (Wurdack) Michelang.

Miconia curta (Gleason) Wurdack

Miconia curvipila (Urb. & Ekman) Ionta, Judd & Skean

Miconia cuspidata Mart. ex Naudin

Miconia cuspidatissima Pittier

Miconia cutucuensis Wurdack

Miconia cyanocarpa Naudin

Miconia cyathanthera Triana

Miconia cymifera (Donn. Sm.) Michelang.

Miconia daironii Michelang.

Miconia danielii Almeda

Miconia dapsiliflora Wurdack

Miconia dasyclada Wurdack

Miconia dasytricha (A. Gray) R. Goldenb.

Miconia davidsei (Almeda) Almeda

Miconia debilis (Crueg.) Michelang.

Miconia decipiens Cogn.

Miconia decorticans (Bécquer) Bécquer & Majure

Miconia decurrens Cogn.

Miconia deflexa (O. Berg ex Triana) R. Goldenb.

Miconia delicatula A. Rich.

Miconia demissifolia Wurdack

Miconia dendroides (Naudin) R. Goldenb.

Miconia densifolia Cogn.

Miconia dentata (D. Don) Michelang.

Miconia denticulata Naudin

Miconia dependens (Pav. ex D. Don) Judd & Majure

Miconia desiliens (Gleason) Michelang.

Miconia desmantha Benth.

Miconia desportesii Urb.

Miconia diaphanea Gleason

Miconia dichroa Cogn.

Miconia dichrophylla J.F. Macbr.

Miconia diegogomezii Kriebel & Almeda

Miconia dielsiana Urb.

Miconia dielsii Markgr.

Miconia difficilis Triana

Miconia diffusa (Cogn.) R. Goldenb.

Miconia diguensis (Wurdack) Michelang.

Miconia dimorphica (J.F. Macbr.) Michelang.

Miconia dimorphotheca Jan. M. Burke & Michelang.

Miconia dioica Wurdack

Miconia dipsacea Naudin

Miconia discoidea (Lozano & N. Ruiz-R.) Almeda & Alvear

Miconia discolor DC.

Miconia discolorata Bécquer & Michelang.

Miconia dispar Benth.

Miconia dissimulans Wurdack

Miconia dissita Almeda

Miconia dissitiflora Almeda

Miconia dissitinervia Kriebel, Almeda & A. Estrada

Miconia disticha Michelang.

Miconia divaricata Gardner

Miconia divaricatiflora Judd & Bécquer

Miconia divergens Triana

Miconia divisoriana Wurdack

Miconia dodecandra Cogn.

Miconia dodsonii Wurdack

Miconia dolichantha (Naudin) R. Goldenb.

Miconia dolichodons (Cogn.) R. Goldenb.

Miconia dolichopoda Naudin

Miconia dolichorrhyncha Naudin

Miconia dolichostachya (Naudin) R. Goldenb.

Miconia domatiata (Urb. & Ekman) Skean & Judd

Miconia domingensis Cogn.

Miconia dominicensis (Penneys & Judd) Penneys

Miconia domociliata Michelang.

Miconia doniana Naudin

Miconia dorsaliporosa R. Goldenb. & Reginato

Miconia dorsiloba Gleason

Miconia drosera (Sagot) Michelang.

Miconia dubia (DC.) R. Goldenb.

Miconia duckei Cogn.

Miconia dudleyi Wurdack

Miconia duidae (Gleason) Michelang.

Miconia dulcis Jan. M. Burke & Michelang.

Miconia dumetosa Cogn.

Miconia dunstervillei Wurdack

Miconia dura Triana

Miconia durandii Michelang. & P.Jørg

Miconia dusenii (Cogn.) R. Goldenb.

Miconia ebracteata (Triana) R. Goldenb.

Miconia echinata (Griseb.) Judd, Bécquer & Majure

Miconia echinocarpa Judd, Bécquer & Majure

Miconia ecuadorensis (Gleason) Michelang.

Miconia edentula (Gleason) Michelang.

Miconia egensis Cogn.

Miconia egregia Wurdack

Miconia eichleri Cogn.

Miconia ekmanii (Urb.) Judd, Bécquer & Majure

Miconia elaeodendron (DC.) Naudin

Miconia elaeoides Naudin

Miconia elata (Sw.) DC.

Miconia eleagnoides (Sw.) Griseb.

Miconia elegans Cogn.

Miconia elegantissima Bécquer & Judd

Miconia ellipsoidea (Urb. & Ekman) Ionta, Judd & Skean

Miconia ellsworthii Michelang.

Miconia elongata Cogn.

Miconia elvirae Wurdack

Miconia emendata Wurdack

Miconia epibaterium (DC.) Michelang.

Miconia eremita L. Uribe

Miconia erikasplundii Gamba & Almeda

Miconia erikmaniana Skean & Judd

Miconia eriocalyx Cogn.

Miconia erioclada Triana

Miconia eriodonta DC.

Miconia ernstii Wurdack

Miconia ernstulei Michelang.

Miconia erosa Gleason

Miconia erostrata (DC.) R. Goldenb.

Miconia erythrantha Naudin

Miconia erythropogon (DC.) Judd & Ionta

Miconia espinosae Markgr.

Miconia eugenioides Triana

Miconia euphorbioides (Naudin) R. Goldenb.

Miconia evanescens (Almeda) Gamba & Almeda

Miconia expansa Gleason

Miconia explicita Wurdack

Miconia extinctoria (Bonpl.) Michelang.

Miconia fabianiana Mabb.

Miconia fadyenii (Hook.) Judd & Skean

Miconia falcata Cogn.

Miconia fallacissima (Markgr.) R. Goldenb.

Miconia fallax DC.

Miconia fanshawei Wurdack

Miconia farfanii Jan. M. Burke & Michelang.

Miconia farinasii (Wurdack) Michelang.

Miconia fasciculata Gardner

Miconia fastigiata (Cogn.) R. Goldenb.

Miconia fausta (Wurdack) Michelang.

Miconia favosa (Desr.) Naudin

Miconia fenestrata (Benth.) Michelang.

Miconia ferreyrae Wurdack

Miconia ferruginata DC.

Miconia ferruginea (Desr.) DC.

Miconia fictilis (J.F. Macbr.) Michelang. & R. Goldenb.

Miconia filamentosa Gleason

Miconia filiformis (Gleason) Michelang.

Miconia filisepala (Urb.) Judd, Bécquer & Majure

Miconia firma J.F. Macbr.

Miconia fissa Gleason

Miconia fissinervia (Gleason) Michelang.

Miconia flaccida Gleason

Miconia flammea Casar.

Miconia flavescens Cogn.

Miconia flexuosa (Triana) Michelang.

Miconia floccosa Cogn.

Miconia florbella Schnell ex Michelang. & R.Goldenb.

Miconia floribunda (Bonpl.) DC.

Miconia fluminensis Ule

Miconia foliosa Triana

Miconia folsomii (Almeda) Almeda

Miconia fontanae (Reginato & R. Goldenb.) R. Goldenb.

Miconia foreroi (Wurdack) Michelang.

Miconia formicaria Gamba & Almeda

Miconia formicocollina Michelang.

Miconia formicofoliosa Michelang.

Miconia formicoheterophylla Michelang.

Miconia formicojuruensis Michelang.

Miconia formicosetosa Michelang.

Miconia formonense (Judd, Skean & Clase) Judd, Bécquer & Majure

Miconia formosa Cogn.

Miconia forzzae R. Goldenb. & Hinoshita

Miconia fosbergii Wurdack

Miconia fosteri Wurdack

Miconia foveolata Cogn.

Miconia fragilis Naudin

Miconia fragrans Cogn.

Miconia fragrantissima (Almeda) Michelang. & Almeda

Miconia francavillana Cogn.

Miconia fraterna (Gleason) Michelang.

Miconia freyreissii (Cogn.) R. Goldenb.

Miconia friedmaniorum Almeda & Umaña

Miconia friedrichlehmannii R. Goldenb.

Miconia frontinoana Cogn. & Gleason

Miconia fruticulosa Cogn.

Miconia fuertesii Cogn.

Miconia fuliginosa Wurdack

Miconia fulvostellata L.O. Williams

Miconia funckii Wurdack

Miconia furfuracea (Vahl) Griseb.

Miconia galactantha Naudin

Miconia galdamesiae Kriebel & Almeda

Miconia galeiformis Jan. M. Burke & Michelang.

Miconia galeottii (Naudin) Michelang.

Miconia garcia-barrigae (Wurdack) Almeda

Miconia gentryi Wurdack

Miconia georgebuntingii Michelang.

Miconia gibba Markgr.

Miconia gigantea Cogn.

Miconia gigantophylla (Britton) Michelang.

Miconia gilva Cogn.

Miconia glaberrima (Schltdl.) Naudin

Miconia glabrata Cogn.

Miconia glabrifolia Judd, Bécquer & Majure

Miconia glandulifera Cogn.

Miconia glanduliflora R. Goldenb. & Michelang.

Miconia glandulipetala Ocampo & Almeda

Miconia glandulistyla Wurdack

Miconia glandulosa (Sw.) Naudin

Miconia glaucescens Triana

Miconia glazioviana Cogn.

Miconia gleasoniana Wurdack

Miconia globulifera Naudin

Miconia globuliflora (Rich.) Cogn.

Miconia glomerata Triana

Miconia glomerulifera Cogn.

Miconia glomeruliflora Judd, Bécquer & Majure

Miconia gloriosa (Macfad.) Michelang.

Miconia glutinosa Cogn.

Miconia glyptophylla Wurdack

Miconia goldenbergiana Caddah

Miconia gonioclada Triana

Miconia goniostigma Triana

Miconia gonoptera (Gleason) Michelang.

Miconia gorzulae (Wurdack) Michelang. & R. Goldenb.

Miconia gossypina Triana

Miconia goudotii Naudin

Miconia graciliflora (Huber) Michelang.

Miconia gracilifolia Ionta & Judd

Miconia gracilipes (Gleason) Michelang.

Miconia gracilis Triana

Miconia granatensis (Gleason) Ocampo & Almeda

Miconia grandibracteata Judd, Bécquer & Majure

Miconia grandidentata Almeda

Miconia grandiflora Cogn.

Miconia grandifoliata R. Goldenb. & Michelang.

Miconia granulata (Urb.) Majure & Judd

Miconia granvillei (Wurdack) Michelang.

Miconia gratissima Benth. ex Triana

Miconia grayana Cogn.

Miconia grayumii Almeda

Miconia grenadensis (Penneys & Judd) Penneys

Miconia griffisii J.F. Macbr.

Miconia grisea Cogn.

Miconia grisebachiana Bécquer & Michelang.

Miconia grossidentata Wurdack

Miconia guadalupensis (DC.) Judd, Ionta, & Majure

Miconia guaiquinimae Wurdack

Miconia guajaibonensis Judd, Bécquer & Majure

Miconia guatemalensis Cogn.

Miconia guayaquilensis (Bonpl.) D. Don ex DC.

Miconia gynoverrucosa (Reginato) R. Goldenb.

Miconia hadrophylla Wurdack

Miconia haemantha (Triana ex Cogn.) Skean, Judd & Majure

Miconia haemanthoides Skean, Judd & Majure

Miconia hamata Cogn.

Miconia hammelii (Almeda) Almeda

Miconia hanstuerckheimii Michelang.

Miconia harlingii Wurdack

Miconia hatschbachii (Brade) R. Goldenb.

Miconia haughtii (Gleason) Wurdack

Miconia heliotropoides Triana

Miconia hematostemon Naudin

Miconia hemenostigma Naudin

Miconia henripittieri (Kriebel) Michelang.

Miconia heptamera (Wurdack) Michelang.

Miconia herincquiana (Cogn.) R. Goldenb.

Miconia hermogenesii (Baumgratz & D'El Rei Souza) Goldenberg

Miconia hernandogarciae H. Mend. & Idárraga

Miconia herpetica DC.

Miconia herrerae Gleason

Miconia herzogii Cogn.

Miconia heterochaeta Wurdack

Miconia heteroclita (Naudin) Michelang.

Miconia heteromera Naudin

Miconia heteronervis (Naudin) Michelang.

Miconia heteroneura (Schrank & Mart. ex DC.) Michelang.

Miconia heterophylla (Naudin) M. Gómez

Miconia heteroporata (Reginato) R. Goldenb.

Miconia heterothrix Gleason & Wurdack

Miconia heterotricha Wurdack

Miconia hexamera Wurdack

Miconia hexapetala Wurdack

Miconia hildeana Kriebel & Almeda

Miconia hirsuta (Sw.) Judd, Bécquer & Majure

Miconia hirsutivena Gleason

Miconia hirta Cogn.

Miconia hirtella Cogn.

Miconia hirtellicaulis Ionta & Judd

Miconia hirticalyx Judd & Bécquer

Miconia hirticaulis Skean, Judd & Majure

Miconia hirtistyla Bécquer & Majure

Miconia hispaniolica Judd & Majure

Miconia hispidula (Cogn.) Judd, Bécquer & Majure

Miconia histothrix Wurdack

Miconia holosericea (L.) DC.

Miconia hondurensis Donn. Sm.

Miconia hookeriana Triana

Miconia horrida (Cogn.) R. Goldenb.

Miconia hospitalis Wurdack

Miconia hotteana (Urb. & Ekman) Judd & Ionta

Miconia hotteana (Urb. & Ekman) Judd & Ionta

Miconia hottensis Ionta, Judd & Skean

Miconia howardiana Judd, Salzman & Skean

Miconia huanucensis Wurdack

Miconia huberi Wurdack

Miconia huigrensis Wurdack

Miconia humifusa Jan. M. Burke & Michelang.

Miconia hutchisonii Wurdack

Miconia hybophylla (Urb.) Majure & Judd

Miconia hyemalis A. St.-Hil. & Naudin

Miconia hygrophila Naudin

Miconia hylophila Wurdack

Miconia hymenanthera Triana

Miconia hyperprasina Naudin

Miconia hypiodes Urb. & Ekman

Miconia hypoglauca (C. Wright ex Griseb.) Judd, Bécquer & Majure

Miconia hypoleuca (Benth.) Triana

Miconia ibaguensis (Bonpl.) Triana

Miconia ibarrae Almeda

Miconia icosandra Gleason

Miconia idiogena Wurdack

Miconia idroboi Wurdack

Miconia iluensis Wurdack

Miconia imbricata Gleason

Miconia imitans Wurdack

Miconia imparilis (Wurdack) Michelang.

Miconia impetiolaris (Sw.) D. Don ex DC.

Miconia impressa (Urb.) Judd, Bécquer & Majure

Miconia impressinervis Skean & Judd

Miconia inaequalifolia Triana

Miconia inaequalis R. Goldenb. & Michelang.

Miconia inaequidens (DC.) Naudin

Miconia inaequipetiolata Majure & Judd

Miconia inamoena Pilg.

Miconia inanis Cogn. & Gleason ex Gleason

Miconia incachacana Wurdack

Miconia incerta (Wurdack) Gamba & Almeda

Miconia inconspicua Miq.

Miconia incurva Gleason

Miconia indicoviolacea Gamba, Almeda & Alvear

Miconia ingens Wurdack

Miconia innata Gleason

Miconia inobsepta (Wurdack) Michelang.

Miconia inopinata (Almeda) Almeda

Miconia insueta Wurdack

Miconia insularis Gleason

Miconia integrifolia Cogn.

Miconia intermedia (DC.) Ocampo & Almeda

Miconia intonsa (E. Cotton & W. Meier) Michelang.

Miconia intricata Triana

Miconia inusitata (Wurdack) Michelang. & R. Goldenb.

Miconia ioneura Griseb.

Miconia ionopogon (Mart.) R. Goldenb.

Miconia irwinii Wurdack

Miconia itatiaiae (Wawra) R. Goldenb.

Miconia iteophylla Almeda

Miconia jahnii Pittier

Miconia jaliscana (Standl.) Michelang.

Miconia jamesluteynii Michelang.

Miconia jashaferi Majure & Judd

Miconia javorkaeana Borhidi

Miconia jefensis Almeda

Miconia jentaculorum Wurdack

Miconia jimenezii Judd & R.S. Beaman

Miconia jitotolana Wurdack

Miconia jorgensenii Wurdack

Miconia josecuatrecasasii R. Goldenb. & Michelang.

Miconia jucunda (DC.) Triana

Miconia juddii (Skean) Skean, Judd & Majure

Miconia julianii Michelang.

Miconia juliansteyermarkii R. Goldenb. & Michelang.

Miconia juruensis Pilg.

Miconia kappellei Almeda & Kriebel

Miconia kappleri Naudin

Miconia karlkrugii Majure & Judd

Miconia karsticola Judd, Bécquer, Skean & Majure

Miconia kavanayensis Wurdack

Miconia klotzschii Triana

Miconia klugii Gleason

Miconia koepckeana Wurdack

Miconia kollmannii R. Goldenb. & Reginato

Miconia kraenzlinii Cogn.

Miconia kriegeriana Baumgratz & Chiaveg.

Miconia krugiana (Cogn.) Majure & Judd

Miconia krugii Cogn.

Miconia kuntzei Cogn.

Miconia labiakiana Goldenb. & C.V. Martin

Miconia lacera (Bonpl.) Naudin

Miconia lachnoclada Wurdack

Miconia laciniata Wurdack

Miconia lacunosa (Cogn.) R. Goldenb.

Miconia laeta Cogn.

Miconia laetivirens L. Uribe

Miconia laevifolia (Gleason) Michelang.

Miconia laevigata (L.) D. Don

Miconia laevipilis Wurdack

Miconia lagunensis Ule

Miconia lambayequensis Wurdack

Miconia lamprarrhena Triana

Miconia lamprophylla Triana

Miconia lanata (DC.) Triana

Miconia lanatifolia Judd, Bécquer & Majure

Miconia lanceifolia (Urb.) Ionta, Judd & Skean

Miconia lanceolata (Desr.) DC.

Miconia lancifolia (Spruce ex Triana) Michelang.

Miconia lapae (D'El Rei Souza & Baumgratz) R. Goldenb.

Miconia lappacea (DC.) Triana

Miconia larensis Gleason

Miconia lasiocalyx Cogn.

Miconia lasiopetala (Cogn.) Almeda

Miconia lasiopoda (Benth.) Michelang.

Miconia lasiostachya (Cogn.) R. Goldenb.

Miconia lasiostyla Gleason

Miconia lasseri Gleason

Miconia latecrenata (DC.) Naudin

Miconia lateriflora Cogn.

Miconia latidecurrens Gamba & Almeda

Miconia latifolia (D. Don) Naudin

Miconia latistigma Cogn.

Miconia laurina (D. Don) Naudin

Miconia laxa Wurdack

Miconia laxiflora (Schltdl.) Michelang.

Miconia laxivenula (Wurdack) Gamba & Almeda

Miconia leabiscoriacea R. Goldenb.

Miconia leabiswarmingiana R. Goldenb.

Miconia leablanchetiana R. Goldenb.

Miconia leacalvescens R. Goldenb.

Miconia leacapitata R. Goldenb.

Miconia leacinnamomifolia R. Goldenb.

Miconia leacollina R. Goldenb.

Miconia leaconfusa R. Goldenb.

Miconia leacongestiflora R. Goldenb.

Miconia leacordifolia R. Goldenb.

Miconia leacoriacea R. Goldenb.

Miconia leacrenata R. Goldenb. & Michelang.

Miconia leacuminata R. Goldenb.

Miconia leacuneata R. Goldenb.

Miconia leadebilis R. Goldenb.

Miconia leadentata R. Goldenb.

Miconia leadispar R. Goldenb.

Miconia leaechinata R. Goldenb.

Miconia leaeichleri R. Goldenb.

Miconia leaeriocalyx R. Goldenb.

Miconia leafallax R. Goldenb.

Miconia leaflavescens R. Goldenb.

Miconia leafloribunda R. Goldenb.

Miconia leafluminensis R. Goldenb.

Miconia leafoveolata R. Goldenb.

Miconia leafragilis R. Goldenb.

Miconia leagracilis R. Goldenb.

Miconia leagrayana R. Goldenb.

Miconia leahirtella R. Goldenb.

Miconia leahumilis R. Goldenb.

Miconia leakleinii R. Goldenb.

Miconia lealancifolia R. Goldenb.

Miconia lealindeniana Michelang. & R. Goldenb.

Miconia lealpestris R. Goldenb.

Miconia leamarginata R. Goldenb.

Miconia leamarkgrafii R. Goldenb.

Miconia leamollis R. Goldenb.

Miconia leamourae R. Goldenb.

Miconia leandroides Cogn. & Gleason ex Gleason

Miconia leaneurotricha R. Goldenb.

Miconia leaoblongifolia R. Goldenb.

Miconia leaorganensis R. Goldenb.

Miconia leaovata R. Goldenb.

Miconia leapallida R. Goldenb.

Miconia leapennipilis R. Goldenb.

Miconia leapolychaeta R. Goldenb.

Miconia learamboi R. Goldenb.

Miconia leariedeliana R. Goldenb.

Miconia learigida R. Goldenb.

Miconia leasaldanhae R. Goldenb.

Miconia leasanguinea R. Goldenb.

Miconia leasylvatica R. Goldenb.

Miconia leatetragona R. Goldenb.

Miconia leatetraptera R. Goldenb.

Miconia leathyrsiflora R. Goldenb.

Miconia leatomentosa R. Goldenb.

Miconia leatrata R. Goldenb.

Miconia leatristis R. Goldenb.

Miconia leatruncata R. Goldenb.

Miconia leaumbellata R. Goldenb.

Miconia leavelutina R. Goldenb.

Miconia leawarmingiana R. Goldenb.

Miconia leblondii Judd & Skean

Miconia lechleri Triana

Miconia ledifolia (DC.) Naudin

Miconia lehmannii Cogn.

Miconia leiotricha Wurdack

Miconia lenticellata Alain

Miconia lepidota DC.

Miconia leptantha Urb. & Ekman

Miconia leptopus (Triana) Michelang. & R. Goldenb.

Miconia leticiana (Michelang.) Michelang.

Miconia leucandra (C. Wright ex Griseb.) Judd & Ionta

Miconia leucocarpa DC.

Miconia licrophora Wurdack

Miconia liebmannii Cogn.

Miconia liesneri Wurdack

Miconia ligulata Almeda

Miconia ligustrina (Sm.) Triana

Miconia ligustroides (DC.) Naudin

Miconia lilacina Triana

Miconia lima (Desr.) M. Gómez

Miconia limbata (Cogn.) R. Goldenb.

Miconia limitaris Wurdack

Miconia limoides (Urb.) Majure & Judd

Miconia lindeniana (Naudin) M. Gómez

Miconia lindmanii (Urb.) Bécquer & Michelang.

Miconia linearis (Gleason) Michelang.

Miconia linnaeoides (Hook. f.) Michelang.

Miconia liogieri Bécquer & Michelang.

Miconia lithophila L. Uribe

Miconia littlei Wurdack

Miconia livida Triana

Miconia loligomorpha (R. Goldenb. & Reginato) R. Goldenb.

Miconia lomensis (Urb.) Michelang.

Miconia lonchophylla Naudin

Miconia longibarbis (Schrank & Mart. ex DC.) R. Goldenb.

Miconia longibracteata Almeda

Miconia longicollis (Urb. & Cogn.) Judd & Bécquer

Miconia longicoma (Cogn.) Ocampo & Almeda

Miconia longicuspidata S.S. Renner & R. Goldenb.

Miconia longicuspis Cogn.

Miconia longidentata Michelang. & W. Meier

Miconia longifolia (Aubl.) DC.

Miconia longipetiolata (Brade) R. Goldenb.

Miconia longiracemosa Gleason

Miconia longirostrata R. Romero, Fontelas & Versiane

Miconia longisepala Gleason

Miconia longisetosa Wurdack

Miconia longispicata Triana

Miconia lorenzouribei Michelang.

Miconia loretensis Pilg.

Miconia loreyoides Triana

Miconia lourteigiana Wurdack

Miconia loxensis (Bonpl.) DC.

Miconia lucenae R.Goldenb. & Michelang.

Miconia luciana Gleason

Miconia lucianobernadii Michelang.

Miconia lucida Naudin

Miconia luctatoris (Wurdack) R. Goldenb.

Miconia lugonis Wurdack

Miconia lugubris Cogn.

Miconia lundelliana L.O. Williams

Miconia lundellii (Wurdack) Almeda

Miconia lurida Cogn.

Miconia lutea (Cogn.) R. Goldenb.

Miconia luteola Cogn.

Miconia lutescens (Bonpl.) DC.

Miconia luteynii Wurdack

Miconia lutgardae Bécquer & Michelang.

Miconia lymanii Wurdack

Miconia macayana Judd & Skean

Miconia macbrydeana Wurdack

Miconia machinazana C. Ulloa & D.A. Neill

Miconia macrantha Triana

Miconia macrocarpa (Urb. & Ekman) Judd & Ionta

Miconia macrodon (Naudin) Wurdack

Miconia macropetala Michelang.

Miconia macrophysca (Spruce ex Triana) Michelang.

Miconia macropora (Triana) R. Goldenb.

Miconia macroptera (Naudin) Michelang.

Miconia macrosperma (Mart.) Michelang.

Miconia macrothyrsa Benth.

Miconia macrotis Cogn.

Miconia maculata (Urb. & Ekman) Judd, Bécquer & Majure

Miconia macuxi Meirelles, Caddah & R. Goldenb.

Miconia madisonii Wurdack

Miconia madrensis Standl.

Miconia magdalenae Triana

Miconia magdalenensis (Brade) R. Goldenb.

Miconia magnipetala (R. Goldenb. & E. Camargo) R. Goldenb.

Miconia maguirei Gleason

Miconia mailyniae H. Mend. & Aguirre-Santoro

Miconia majalis Cogn.

Miconia malatestae J.F. Macbr.

Miconia manarae (Wurdack) Michelang.

Miconia manauara R. Goldenb., Caddah & Michelang.

Miconia mandonii Cogn.

Miconia manicata Cogn. & Gleason

Miconia manserichensis (Wurdack) Michelang.

Miconia mansfeldiana Urb. & Ekman

Miconia mantuensis (Britton & P. Wilson) Bécquer

Miconia mapirensis Gleason

Miconia marahuacensis (Wurdack) Michelang.

Miconia marginata Triana

Miconia mariae Wurdack

Miconia marigotiana (Urb. & Ekman) Majure & Judd

Miconia maroana Wurdack

Miconia martiniana Gleason

Miconia martinicensis Cogn.

Miconia matthaei Naudin

Miconia mattogrossensis Hoehne

Miconia mattosii (Baumgratz & D'El Rei Souza) R. Goldenb.

Miconia matudae (L.O. Williams) Michelang.

Miconia mavacana (Wurdack) Michelang.

Miconia maximowicziana Cogn.

Miconia mayarensis (Urb.) Bécquer & Michelang.

Miconia mayeta (D. Don) Michelang.

Miconia mazanana J.F. Macbr.

Miconia mazatecana de Santiago

Miconia mcphersonii Almeda & Penneys

Miconia mcvaughii Wurdack

Miconia media (D. Don) Naudin

Miconia mediocris Wurdack

Miconia medusa Gleason

Miconia megalantha Gleason

Miconia melanodesma (Naudin) Michelang. & R. Goldenb.

Miconia melanotricha (Triana) Gleason

Miconia melastomoides (Raddi) R. Goldenb.

Miconia melinonis Naudin

Miconia mellina DC.

Miconia membranacea Triana

Miconia mendoncaei Cogn.

Miconia meridensis Triana

Miconia meridionalis (D'El Rei Souza) R. Goldenb.

Miconia mesmeana Gleason

Miconia mesoamericana Michelang.

Miconia metallica (Naudin) Triana

Miconia micayana Wurdack

Miconia michelangeliana R. Goldenb. & L. Kollmann

Miconia miconiastrum (Naudin) R. Goldenb.

Miconia micrantha Cogn.

Miconia microdictya (Urb. & Ekman) Skean, Judd & Majure

Miconia microflora R. Goldenb. & Michelang.

Miconia micropetala Cogn.

Miconia microphylla (C. Wright) M. Gómez

Miconia microphysca Michelang.

Miconia microstachya (Naudin) R. Goldenb.

Miconia microthyrsa (R.O. Williams) Michelang.

Miconia miguelfuertesii Ionta & Judd

Miconia miles-morganii J.F. Macbr.

Miconia militis Wurdack

Miconia mimica Gleason

Miconia minuta Gleason

Miconia minutiflora (Bonpl.) DC.

Miconia miocarpa Naudin

Miconia mirabilis (Aubl.) L.O. Williams

Miconia mituana Wurdack

Miconia moana (Borhidi & O. Muñiz) Bécquer & Michelang.

Miconia mocquerysii Wurdack

Miconia modica J.F. Macbr.

Miconia moensis (Britton) Alain

Miconia molesta Cogn.

Miconia molinopampana Wurdack

Miconia mollicula Triana

Miconia mollis Triana

Miconia molybdea Naudin

Miconia monantha (L.O. Williams) Michelang.

Miconia monciona Urb. & Ekman

Miconia monocephala Urb.

Miconia monopleura (Urb.) Bécquer & Majure

Miconia monteleagreana (Cogn.) Michelang.

Miconia monzoniensis Cogn.

Miconia moorei Wurdack

Miconia morichensis (Wurdack) Michelang.

Miconia morii Almeda

Miconia mornicola A.C. Nicolson

Miconia mortoniana (Standl.) Michelang.

Miconia mourae Cogn.

Miconia mulleola Wurdack

Miconia multiflora Cogn. ex Britton

Miconia multiglandulosa Cogn.

Miconia multinervia Cogn.

Miconia multiplinervia Cogn.

Miconia multisetosa (Cogn.) R. Goldenb.

Miconia multispicata Naudin

Miconia munchicana (Lozano & N. Ruiz-R.) Almeda & Alvear

Miconia munizii (Borhidi) Ionta & Bécquer

Miconia muricata (D. Don) Triana

Miconia muriculata (Almeda) Michelang. & Almeda

Miconia mutabilis (DC.) Triana

Miconia mutisiana Markgr.

Miconia myriantha Benth.

Miconia myrmecina (Gleason) Michelang.

Miconia myrmecodomatia Michelang.

Miconia myrtiformis Naudin

Miconia myrtillifolia Naudin

Miconia namandensis Wurdack

Miconia nambyquarae Hoehne

Miconia nanayensis (Wurdack) R. Goldenb. & Michelang.

Miconia nanopetala R. Goldenb. & Michelang.

Miconia nanophylla Judd, Bécquer & Majure

Miconia napoana Wurdack

Miconia nasella Wurdack

Miconia navasensis (Britton & P. Wilson) Ionta & Bécquer

Miconia navicularis (Brade) R. Goldenb.

Miconia navifolia Ionta, Judd & Skean

Miconia navioensis Wurdack

Miconia neblinae (Wurdack) Michelang.

Miconia neblinensis Wurdack

Miconia nebulensis Michelang.

Miconia neei Jan. M. Burke & Michelang.

Miconia neglecta (Brade) R. Goldenb.

Miconia nematophora Urb. & Ekman

Miconia neoamygdalina Skean, Judd & Majure

Miconia neocalcarata Michelang.

Miconia neocoloradensis Almeda

Miconia neocordata Michelang.

Miconia neocoronata Gamba & Almeda

Miconia neocrotonifolia Michelang.

Miconia neocrugeriana Michelang.

Miconia neoepiphytica Michelang.

Miconia neolanuginosa Almeda

Miconia neopectinata Almeda

Miconia neopilosa Michelang.

Miconia neosecunda Ocampo & Almeda

Miconia neosecundiflora Ocampo & Almeda

Miconia neourceolata Michelang.

Miconia neriifolia Triana

Miconia nervosa (Sm.) Triana

Miconia nervosissima Michelang. & R. Goldenb.

Miconia neurotricha Cogn.

Miconia nianga (DC.) R. Goldenb.

Miconia niangaiformis (Cogn.) R. Goldenb.

Miconia niederleinii (Cogn.) R. Goldenb.

Miconia nigricans Cogn.

Miconia nigripes Cogn. & Gleason

Miconia nipensis (Britton & P. Wilson) Ionta & Bécquer

Miconia nitens Benth.

Miconia nitida (D. Don) Naudin

Miconia nitidissima Cogn.

Miconia nobilis Gleason

Miconia nodosa Cogn.

Miconia norandina Michelang.

Miconia nordestina R. Goldenb. & E.C.O. Chagas

Miconia norlindii (Urb.) Majure & Judd

Miconia notabilis Triana

Miconia novemnervia Naudin

Miconia nubicola Proctor

Miconia nutans Donn. Sm.

Miconia nystroemii Ekman ex Urb.

Miconia obconica Gleason & Wurdack

Miconia obliqua Gleason

Miconia oblonga (Gleason) Michelang.

Miconia oblongifolia Cogn.

Miconia obovata Triana

Miconia obscura (Bonpl.) Naudin

Miconia obtusa (Griseb.) Triana

Miconia obtusifolia (Cogn.) Skean, Judd & Majure

Miconia ocampensis Skean, Judd & Majure

Miconia ochracea Triana

Miconia octona (Bonpl.) Judd & Majure

Miconia octopetala Cogn.

Miconia odoratissima L.A. Cárdenas

Miconia oellgaardii E. Cotton

Miconia oerstediana (O. Berg ex Triana) Michelang.

Miconia oinochrophylla Donn. Sm.

Miconia oldemanii Wurdack

Miconia oleifolia (Griseb.) M. Gómez

Miconia oligantha Wurdack

Miconia oligocephala Donn. Sm.

Miconia oligochaeta (Cham.) R. Goldenb.

Miconia oligotricha (DC.) Naudin

Miconia ombrophila Wurdack

Miconia omissa Bécquer & Michelang.

Miconia onaensis Wurdack

Miconia oocarpa (A. Gray) R. Goldenb.

Miconia opaca (Brade) R. Goldenb.

Miconia opacifolia J.F. Macbr.

Miconia oraria Wurdack

Miconia orcheotoma Naudin

Miconia oreogena Wurdack

Miconia orescia L. Uribe

Miconia organensis Gardner

Miconia ortiziae (Kriebel) Michelang.

Miconia osaensis Aguilar, Kriebel & Almeda

Miconia ossaeifolia Urb. & Ekman

Miconia ossaeiformis Naudin

Miconia ossaeoides (Naudin) Michelang. & Tiernan

Miconia ostentata (Wurdack) Michelang.

Miconia ostrina (Gleason) Michelang.

Miconia ottikeri J.F. Macbr.

Miconia ottobuchtienii Michelang. & R. Goldenb.

Miconia ottoschmidtii (Urb.) Majure & Judd

Miconia ovalifolia Cogn.

Miconia ovata Cogn.

Miconia ovatifolia (Urb.) Judd, Bécquer & Majure

Miconia oxyura (Naudin) Michelang.

Miconia pachyantha Bécquer

Miconia pachydonta Gleason

Miconia pachyphylla Cogn.

Miconia pachystachya (Wurdack) Michelang.

Miconia paeminosa Wurdack

Miconia pagnolensis Majure & Judd

Miconia pailasana Wurdack

Miconia pakaraimae (Wurdack) Michelang.

Miconia palcazuana Michelang. & R. Goldenb.

Miconia paleacea Cogn.

Miconia paleaciramis Michelang. & R. Goldenb.

Miconia palenquensis (Wurdack) Gamba & Almeda

Miconia paludigena Wurdack

Miconia pandurata Triana

Miconia paniculata (Mart. & Schrank ex DC.) Naudin

Miconia papillata (Cogn.) R. Goldenb.

Miconia papillopetala Kriebel & Almeda

Miconia papillosa (Desr.) Naudin

Miconia papillosperma Michelang. & R. Goldenb.

Miconia paradisica Wurdack

Miconia paradoxa (Mart. ex DC.) Triana

Miconia paraguayensis Cogn.

Miconia paralimoides Majure & Judd

Miconia paralongicollis (Judd, Ionta, Clase & Skean) Judd & Bécquer

Miconia parasitica (O. Berg ex Triana) R. Goldenb.

Miconia parvifolia Cogn.

Miconia paspaloides Gleason

Miconia pastazana Wurdack

Miconia pastoensis Triana

Miconia paucartambensis Jan. M. Burke & Michelang.

Miconia paucidens DC.

Miconia paulina (DC.) R. Goldenb.

Miconia paupercula (Naudin) Triana

Miconia pausana Wurdack

Miconia pavoniana Naudin

Miconia pectinata (Cogn.) R. Goldenb.

Miconia pedicellata Cogn.

Miconia pedunculata Majure & Judd

Miconia peltata Almeda

Miconia peltifolia R. Goldenb. & Michelang.

Miconia pendula Umaña & Almeda

Miconia penduliflora Cogn.

Miconia penicillata Gleason

Miconia pennellii Gleason

Miconia penninervis (Griseb.) M. Gómez

Miconia penningtonii Wurdack

Miconia pentlandii Naudin

Miconia pepericarpa DC.

Miconia perclara (Wurdack) Michelang.

Miconia perelegans Urb.

Miconia perezii (Alain) Bécquer & Michelang.

Miconia pergamentacea Cogn.

Miconia perijensis Wurdack

Miconia pernettifolia Triana

Miconia perobscura Wurdack

Miconia persicariifolia Cogn.

Miconia perturbata Wurdack

Miconia petersonii Urb.

Miconia petiolaris (Schltdl. & Cham.) Michelang.

Miconia petiolata (DC.) Michelang.

Miconia petroniana Cogn. & Saldanha

Miconia petropolitana Cogn.

Miconia phaeochaeta Wurdack

Miconia phaeophylla Triana

Miconia phaeotricha Naudin

Miconia phanerostila Pilg.

Miconia phelpsiae (Gleason) R. Goldenb.

Miconia phlebodes Wurdack

Miconia phrynosomaderma Majure & Judd

Miconia pichinchensis Benth.

Miconia picinguabensis R. Goldenb. & A.B. Martins

Miconia pierreboissieriana R. Goldenb.

Miconia pilaloensis Wurdack

Miconia pileata DC.

Miconia pilgeriana Ule

Miconia pilifera (Urb.) Ionta & Bécquer

Miconia pilonensis (Wurdack) R. Goldenb.

Miconia pilosa (Sw.) Judd & Ionta

Miconia pilosissima (Cogn.) R. Goldenb.

Miconia piperifolia Triana

Miconia piperilamina Michelang.

Miconia pisinna Wurdack

Miconia pisinniflora Wurdack

Miconia pittieri Cogn.

Miconia planifilamentosa (Brade) R. Goldenb.

Miconia platyphylla (Benth.) L.O. Williams

Miconia platypoda Gleason

Miconia pleiocrassifolia R. Goldenb.

Miconia pleiofluminensis R. Goldenb. & Michelang.

Miconia pleioglazioviana R. Goldenb.

Miconia pleiomagdalenensis R. Goldenb.

Miconia pleiomicrantha R. Goldenb.

Miconia pleioparvifolia R. Goldenb.

Miconia pleiorosea R. Goldenb.

Miconia pleiosetulosa R. Goldenb.

Miconia plena Gleason

Miconia plethorica Naudin

Miconia plicata (Griseb.) M. Gómez

Miconia plicatifolia Skean, Judd & Majure

Miconia plukenetii Naudin

Miconia plumifera Triana

Miconia poecilantha L. Uribe

Miconia poeppigii Triana

Miconia poiretii (Griseb.) M. Gómez

Miconia polita Gleason

Miconia polyadena (Ule) R. Goldenb.

Miconia polyandra Gardner

Miconia polychaeta Wurdack

Miconia polychaete (Urb. & Ekman) Ionta, Judd & Skean

Miconia polyflora Skean, Judd & Majure

Miconia polygama Cogn.

Miconia polyneura Triana

Miconia polystachya (Naudin) R. Goldenb.

Miconia polytopica Wurdack

Miconia poortmannii (Cogn.) Wurdack

Miconia popayanensis Wurdack

Miconia porphyrotricha (Markgr.) Wurdack

Miconia portogallensis de Santiago & Michelang.

Miconia portoricensis (Alain) Ionta, Judd & Skean

Miconia pozoensis Wurdack

Miconia pozuzoana L.A. Cárdenas & Michelang.

Miconia prancei Wurdack

Miconia prasina (Sw.) DC.

Miconia prasinifolia Gleason

Miconia pratensis Judd, Bécquer & Majure

Miconia prietoi Wurdack

Miconia proctorii Judd

Miconia procumbens (Gleason) Wurdack

Miconia prominens Wurdack

Miconia protuberans Wurdack

Miconia pseudoalternifolia Michelang.

Miconia pseudoaplostachya Cogn.

Miconia pseudocapsularis Wurdack

Miconia pseudocentrophora Cogn.

Miconia pseudodebilis Michelang.

Miconia pseudoeichleri Cogn.

Miconia pseudofloribunda (Bécquer) Bécquer & Michelang.

Miconia pseudopedicellata Judd & Bécquer

Miconia pseudopinetorum (Borhidi & O. Muñiz) Judd, Bécquer & Majure

Miconia pseudoradula Cogn. & Gleason

Miconia pseudorigida Proctor

Miconia psychrophila Naudin

Miconia pterocaulon Triana

Miconia pteroclada Urb.

Miconia pterosepala Urb.

Miconia puberula Cogn.

Miconia pubescens (Gleason) Michelang.

Miconia pubicalyx Gleason

Miconia pubipetala Miq.

Miconia pubistyla (Wurdack) R. Goldenb.

Miconia pujana Markgr.

Miconia pulchra Cogn.

Miconia pulgari J.F. Macbr.

Miconia pulverata Judd, Bécquer & Majure

Miconia pulverulenta Ruiz & Pav.

Miconia pulvinata Gleason

Miconia punctata (Desr.) D. Don ex DC.

Miconia punctibullata M.E. Morales, Michelang. & F. González

Miconia punicea Wurdack

Miconia puracensis Wurdack

Miconia purpurea (D. Don) Judd & Skean

Miconia purpureovillosa (Hoehne) R. Goldenb.

Miconia purpureoviolacea (Cogn.) Michelang.

Miconia purpuriflora Michelang. & R. Goldenb.

Miconia purulensis Donn. Sm.

Miconia pusilliflora (DC.) Naudin

Miconia pustulata Naudin

Miconia pycnantha (Urb. & Ekman) Ionta, Judd & Skean

Miconia pycnaster (Tutin) Michelang.

Miconia pycnoneura Urb.

Miconia pyramidalis (Desr.) DC.

Miconia pyrifolia Naudin

Miconia pyxidata (Proctor) Michelang.

Miconia quadrangularis (Sw.) Naudin

Miconia quadrialata S.S. Renner & S. Beck

Miconia quadricaulis Michelang.

Miconia quadridomius Gamba & Almeda

Miconia quadrifolia Naudin

Miconia quadripora Wurdack

Miconia quadrisulca (Naudin) Ocampo & Almeda

Miconia quinquedentata (DC.) R. Goldenb.

Miconia quinquenervia (Mill.) Gamba & Almeda

Miconia quinquenodis (DC.) R. Goldenb.

Miconia quintuplinervia Cogn.

Miconia rabenii Cogn.

Miconia racemifera (DC.) Triana

Miconia racemosa (Aubl.) DC.

Miconia raddii R. Goldenb.

Miconia radicans (Cogn.) Gamba & Almeda

Miconia radula Cogn.

Miconia radulifolia (Benth.) Naudin

Miconia raggiana Michelang.

Miconia raimondiana (Markgr.) R. Goldenb. & Michelang.

Miconia ramboi Brade

Miconia rangeliana C. Wright ex Griseb.

Miconia rariflora (Bonpl.) Michelang.

Miconia rava Wurdack

Miconia ravenii Wurdack

Miconia reburrosa Wurdack

Miconia reclinata (Bonpl.) Naudin

Miconia recondita Wurdack

Miconia reducens Triana

Miconia reflexa (Gleason) Michelang.

Miconia reflexipila Wurdack

Miconia refracta (Cogn.) R. Goldenb.

Miconia regelii Cogn.

Miconia reitziana (Cogn. & Gleason) Gamba & Almeda

Miconia reitzii (Wurdack) R. Goldenb.

Miconia remotiflora Urb.

Miconia renatogoldenbergii Meirelles & Bacci

Miconia renatoi Gamba & Almeda

Miconia rennerae E. Cotton

Miconia repens (Triana) Michelang.

Miconia reptans (R.Goldenb. & Reginato) R. Goldenb.

Miconia resima Naudin

Miconia resimoides Cogn.

Miconia resinosa (Gleason) Michelang.

Miconia reticulata Triana

Miconia reticulato-venosa Judd, Bécquer & Majure

Miconia retropila (DC.) Ocampo & Almeda

Miconia retusa Pilg.

Miconia reversa (DC.) Ocampo & Almeda

Miconia revolutifolia Skean, Judd & Majure

Miconia rhamnifolia (Naudin) Ocampo & Almeda

Miconia rheophytica Posada-Herrera & Almeda

Miconia rhodantha Wurdack

Miconia rhodopetala (Donn. Sm.) Michelang.

Miconia rhodopogon (DC.) R. Goldenb.

Miconia rhombifolia Alain

Miconia rhomboidea (Urb. & Ekman) Skean & Judd

Miconia rhytidophylla Naudin

Miconia ribesiiflora (Cham.) R. Goldenb.

Miconia ricardoi Kriebel & Almeda

Miconia richardsprucei Michelang.

Miconia riedeliana (O.Berg ex Triana) R.Goldenb.

Miconia rigens Naudin

Miconia rigida (Sw.) Triana

Miconia rigidissima Urb. & Ekman

Miconia rimachii Wurdack

Miconia rimalis Naudin

Miconia rimbachii Wurdack

Miconia riograndensis (Brade) R. Goldenb.

Miconia riparia Triana

Miconia rivalis Wurdack

Miconia rivetii Danguy & Cherm.

Miconia robinsoniana Cogn.

Miconia robusta Cogn.

Miconia rodriguezii (Almeda) Almeda

Miconia rondoniensis Meirelles & R. Goldenb.

Miconia ronliesneri Michelang.

Miconia roraimensis Ule

Miconia roseopetala Michelang.

Miconia rosmarinifolia (Griseb.) M. Gómez

Miconia rotundifolia (D. Don) Naudin

Miconia rubella (Raddi) R. Goldenb.

Miconia rubens (Sw.) Naudin

Miconia rubescens (Triana) Gamba & Almeda

Miconia rubida (Cogn.) R. Goldenb.

Miconia rubiginosa (Bonpl.) DC.

Miconia rubra (Aubl.) Mabb.

Miconia rubricans Triana

Miconia rubrinervis (Naudin) Judd & Bécquer

Miconia rubripetala Michelang.

Miconia rubripila (Cogn.) Judd & Ionta

Miconia rubrisetulosa Ionta, Judd & Skean

Miconia ruddae (Wurdack) Michelang.

Miconia rufa (Griseb.) Triana

Miconia rufescens (Aubl.) DC.

Miconia rufibarbis (Triana) Gamba & Almeda

Miconia ruficalyx Gleason

Miconia ruficaulis Ionta & Bécquer

Miconia rufinervis Judd

Miconia rufipila Triana

Miconia rufiramea Wurdack

Miconia rufistellata Judd & Majure

Miconia rufoalpestris Skean, Judd & Majure

Miconia rufostellulata Pittier

Miconia rugifolia Triana

Miconia rugosa Triana

Miconia ruizii Naudin

Miconia ruizteranii Wurdack

Miconia rupestris Ule

Miconia rupicola Gleason

Miconia rupticalyx Wurdack

Miconia rusbyana Cogn.

Miconia ruschiana Caddah & R. Goldenb.

Miconia russea Wurdack

Miconia rzedowskii de Santiago

Miconia sabiaensis (Brade) R. Goldenb.

Miconia sagotiana Cogn.

Miconia saldanhae Cogn.

Miconia salebrosa Wurdack

Miconia salicifolia Bonpl. ex Naudin

Miconia salicina (Ser. ex DC.) Mabb.

Miconia saltuensis Wurdack

Miconia samanensis Urb.

Miconia sancti-philippi Naudin

Miconia sandemanii Wurdack

Miconia sandwithii (Wurdack) Michelang.

Miconia sanguinea (D. Don) Triana

Miconia santanana Judd & Skean

Miconia santaremensis Wurdack

Miconia santaritensis Almeda

Miconia santoslimae (Brade) R. Goldenb.

Miconia sarmentosa Cogn.

Miconia sastrei Wurdack

Miconia saulensis (Wurdack) Michelang.

Miconia savannarum R.O. Williams

Miconia saxatilis J.F. Macbr.

Miconia saxicola Brandegee

Miconia scaberrima Judd, Bécquer & Majure

Miconia scabra Cogn.

Miconia scabrosa (L.) Ionta, Judd & Skean

Miconia scalpta (Vent.) Ionta, Judd & Skean

Miconia schippii Standl.

Miconia schlechtendalii Cogn.

Miconia schlimii Triana

Miconia schnellii Wurdack

Miconia schunkei Wurdack

Miconia schwackei Cogn.

Miconia sciaphila Judd & Ionta

Miconia sciurea L. Uribe

Miconia sclerophylla Triana

Miconia scopulina (Brandegee) Michelang.

Miconia scutata Gleason

Miconia secuncaquetana Ocampo & Almeda

Miconia secunda R.A. Howard & E.A. Kellogg

Miconia secundiflora Cogn.

Miconia secundifolia Cogn.

Miconia secundivaricata Ocampo & Almeda

Miconia secundo-angustifolia M. Gómez

Miconia secundo-lanceolata M. Gómez

Miconia secunfrancavillana Ocampo & Almeda

Miconia secungrandifolia Ocampo & Almeda

Miconia secunlongisepala Ocampo & Almeda

Miconia secunmacdanielii Ocampo & Almeda

Miconia secunmaguirei Ocampo & Almeda

Miconia secunmexicana Ocampo & Almeda

Miconia secunneblinensis Ocampo & Almeda

Miconia secunpastazana Ocampo & Almeda

Miconia secunpetiolaris Ocampo & Almeda

Miconia secunretropila Ocampo & Almeda

Miconia secunrotundifolia Ocampo & Almeda

Miconia secunsanguinea Ocampo & Almeda

Miconia selleana Urb. & Ekman

Miconia sellowiana Naudin

Miconia semijuga (Gleason) Michelang.

Miconia semisterilis Gleason

Miconia seposita Wurdack

Miconia septentrionalis Judd & R.S. Beaman

Miconia septuplinervis Pittier

Miconia serialis DC.

Miconia sericea (D. Don) Michelang.

Miconia serpens (Triana) Michelang.

Miconia serrulata (DC.) Naudin

Miconia sessiliflora (Naudin) Michelang.

Miconia sessilifolia Naudin

Miconia sessilis Gamba & Almeda

Miconia seticaulis Wurdack

Miconia setifera (Pilg.) Michelang.

Miconia setimarginata Pittier

Miconia setosa Wurdack

Miconia setosociliata Cogn.

Miconia setulosa Cogn.

Miconia shaferi Cogn.

Miconia shattuckii Standl.

Miconia shepherdii R. Goldenb. & Reginato

Miconia siapensis (Wurdack) Michelang.

Miconia silicicola Gleason

Miconia silverstonei Wurdack

Miconia silvestris Gleason

Miconia silvicola (Gleason) Michelang.

Miconia silviphila Michelang.

Miconia simplex Triana

Miconia simplicicaulis (Naudin) R. Goldenb.

Miconia simpsonii (Wurdack) Michelang.

Miconia sintenisii Cogn.

Miconia skeaniana Judd

Miconia skutchiana Michelang.

Miconia smaragdina Naudin

Miconia smithii Cogn. ex Gleason

Miconia sneidernii Wurdack

Miconia sodiroi Wurdack

Miconia solearis (Naudin) Gamba & Almeda

Miconia solenifera (Cogn.) Ocampo & Almeda

Miconia solmsii Cogn.

Miconia sordida Triana

Miconia sororopana Michelang.

Miconia spadiciflora (Triana) Michelang.

Miconia spanantha Judd & Majure

Miconia sparrei Wurdack

Miconia sparsisetulosa (Hoehne) R. Goldenb.

Miconia spatellophora Gleason

Miconia speciosa (A. St.-Hil. & Naudin) Naudin

Miconia spectabilis (Gleason) Michelang.

Miconia spennerostachya Naudin

Miconia sphaerocarpa (Cogn.) R. Goldenb.

Miconia sphagnicola Urb. & Ekman

Miconia spicata (Gleason) Gamba & Almeda

Miconia spicellata Bonpl. ex Naudin

Miconia spichigeri Wurdack

Miconia spinulidentata Cogn. & Gleason

Miconia spinulosa Naudin

Miconia spireifolia Triana

Miconia splendens (Sw.) Griseb.

Miconia sprucei Triana

Miconia squamulosa (Sm.) Triana

Miconia staminea (Desr.) DC.

Miconia staphidioides (Naudin) Triana

Miconia steinbachii Markgr.

Miconia stelligera Cogn.

Miconia stellipilis Cogn.

Miconia stellulata Gleason

Miconia stellulitricha R. Goldenb. & Michelang.

Miconia stenobotrys (Rich.) Naudin

Miconia stenocardia Cogn.

Miconia stenopetala Griseb.

Miconia stenophylla Wurdack

Miconia stenoptera (Gleason) Michelang.

Miconia stenostachya DC.

Miconia stenourea Triana

Miconia stephananthera Ule

Miconia stephanotricha (Naudin) Michelang.

Miconia stephentillettii Michelang.

Miconia sterilis Gleason

Miconia stevensiana Almeda

Miconia steyermarkii Gleason

Miconia stipitata Gleason

Miconia stipularis Naudin

Miconia striata (Vahl) Cogn.

Miconia strigilliflora (Naudin) R. Goldenb.

Miconia strigillosa (Sw.) Judd & Ionta

Miconia strigosa (Triana) Wurdack

Miconia suaveolens Wurdack

Miconia subalpina Gleason

Miconia subandicola Wurdack

Miconia subciliata DC.

Miconia subcompressa Urb.

Miconia subcordata Cogn.

Miconia subcrustulata Beurl.

Miconia suberosa Meireles & R. Goldenb.

Miconia subglabra Cogn.

Miconia subhirsuta (DC.) M. Gómez

Miconia sublanata (Cogn.) R. Goldenb.

Miconia submacrophylla Gleason

Miconia submontana (Rose ex Gleason) Michelang.

Miconia subnodosa Triana

Miconia subobruta (Wurdack) R. Goldenb. & Michelang.

Miconia suborbicularis Cogn.

Miconia subpeltata (Kriebel & Almeda) Almeda

Miconia subseriata (Naudin) R. Goldenb. & Michelang.

Miconia subsessilifolia Wurdack

Miconia subsimplex Pilg.

Miconia subspicata Wurdack

Miconia subtrinervis (Cogn.) R. Goldenb.

Miconia subulata (Gleason) R. Goldenb. & Michelang.

Miconia subulipetala Wurdack

Miconia subvernicosa Cogn.

Miconia sulbahiensis (D'El Rei Souza) R. Goldenb.

Miconia sulcata J.F. Macbr.

Miconia sulcicaulis (Poepp. ex Naudin) Ocampo & Almeda

Miconia sulfurea (Naudin) R. Goldenb.

Miconia summa Cuatrec.

Miconia superba Ule

Miconia superposita Wurdack

Miconia suprabasalis (R. Goldenb. & Reginato) R. Goldenb.

Miconia susannae (Borhidi) Bécquer & Michelang.

Miconia sylvatica (Schltdl.) Naudin

Miconia symphyandra Triana

Miconia symplectocaulos Pilg.

Miconia symplocoidea Triana

Miconia tabayensis Wurdack

Miconia tacanensis Wurdack

Miconia talamancensis Almeda

Miconia tamana Wurdack

Miconia taurina (Gleason) Michelang.

Miconia tenebrosa (Almeda) Almeda

Miconia tenensis Markgr.

Miconia tentaculicapitata Majure & Judd

Miconia tentaculifera Naudin

Miconia tenuifolia (Donn. Sm.) Michelang.

Miconia tenuis Triana

Miconia teotepecensis de Santiago

Miconia tephrodes Wurdack

Miconia tepicana Standl.

Miconia tepuiensis (Wurdack) Michelang.

Miconia terborghii Wurdack

Miconia terera Naudin

Miconia ternata (Cogn.) R. Goldenb.

Miconia ternatifolia Triana

Miconia tetragona Cogn.

Miconia tetragonoloba (Cogn.) Judd, Bécquer & Majure

Miconia tetramera (Urb. & Ekman) Bécquer

Miconia tetrandra (Sw.) D. Don ex G. Don

Miconia tetrapetala (Almeda) Almeda

Miconia tetraptera (Cogn.) Ionta, Judd & Skean

Miconia tetraquetra (Cham.) R. Goldenb.

Miconia tetrasperma Gleason

Miconia tetraspermoides Wurdack

Miconia tetrastoma Naudin

Miconia tetrazygioidea Bécquer & Judd

Miconia tetrazygioides Urb. & Ekman

Miconia thaminantha Wurdack

Miconia theaezans (Bonpl.) Cogn.

Miconia therezopolitana (Cogn.) R. Goldenb.

Miconia thomasiana DC.

Miconia thyrsiflora (D. Don) Naudin

Miconia thyrsoidea (D. Don ex DC.) Naudin

Miconia thysanophylla Wurdack

Miconia tiliifolia Naudin

Miconia tillettii Wurdack

Miconia tinifolia Naudin

Miconia tiri Triana

Miconia titanophylla Gleason

Miconia tixixensis Standl. & Steyerm.

Miconia tocachensis Michelang.

Miconia tocoaristata Michelang.

Miconia tocobovata Michelang.

Miconia tococa (Desr.) Michelang.

Miconia tococapitata Michelang.

Miconia tococaudata Michelang.

Miconia tocociliata Michelang.

Miconia tococinnamomea Michelang.

Miconia tococoidea (DC.) Michelang.

Miconia tococordata Michelang.

Miconia tococoronata Michelang.

Miconia tocohirta Michelang.

Miconia tocopauciflora Michelang.

Miconia tocoracemifera Michelang.

Miconia tomentosa (Rich.) D. Don ex DC.

Miconia tonduzii Cogn.

Miconia torbeciana (Urb. & Ekman) Skean & Judd

Miconia toroi Gleason

Miconia tovarensis Cogn.

Miconia traillii Cogn.

Miconia transversa Gleason

Miconia trauninensis (Cogn.) R. Goldenb.

Miconia trianae Cogn.

Miconia trianana Judd & Bécquer

Miconia triangularis Gleason

Miconia triantha (E. Camargo & R. Goldenb.) R. Goldenb.

Miconia tricaudata Wurdack

Miconia trichocalyx (Pittier) Michelang. & Judd

Miconia trichogona J.F. Macbr.

Miconia trichophora Gleason

Miconia trichosantha (Almeda) Almeda

Miconia trichotoma (Desr.) DC.

Miconia tricostata (Urb. & Ekman) Skean, Judd & Majure

Miconia trimera Wurdack

Miconia trinervia (Sw.) D. Don ex Loudon

Miconia trinitensis (Crueg.) Michelang.

Miconia triplinervis Ruiz & Pav.

Miconia tristis Spring

Miconia trujillensis Wurdack

Miconia truncata Triana

Miconia tschudyoides Cogn.

Miconia tuberculata (Naudin) Triana

Miconia tubulosa Gleason

Miconia tuckeri Gleason

Miconia tuerckheimii Cogn.

Miconia turbinata (Urb. & Ekman) Skean & Judd

Miconia turgida Gleason

Miconia turquinensis Urb. & Ekman

Miconia ulei (Cogn.) R. Goldenb.

Miconia uliginosa (Brade) R. Goldenb.

Miconia ulmarioides Naudin

Miconia umbellata (Mill.) Judd & Ionta

Miconia umbriensis Wurdack

Miconia umbrosa Cogn.

Miconia undabunda (J.F. Macbr.) Michelang.

Miconia undata Triana

Miconia uninervis Alain

Miconia urbaniana Cogn.

Miconia urbanii (Cogn.) Judd

Miconia urceolata Urb.

Miconia uribei Wurdack

Miconia urophylla DC.

Miconia urticilamina Michelang.

Miconia urticoides Triana

Miconia utleyana (Almeda) Almeda

Miconia uvida Wurdack

Miconia uvifera Naudin

Miconia vaccinioides (Bonpl.) Naudin

Miconia valentinensis Bacci & R. Goldenb.

Miconia valenzuelana Michelang. & R.Goldenb.

Miconia valeriana (Standl.) Wurdack

Miconia valida Cogn.

Miconia vallartensis Zabalgoitia, Figueroa & Muñiz-Castro

Miconia vallensis Wurdack

Miconia vallicola (Gleason) Michelang.

Miconia valtheri Naudin

Miconia vargasii Wurdack

Miconia variabilis Gamba & Almeda

Miconia variifolia (Wurdack) Michelang.

Miconia vazquezii (Borhidi & O. Muñiz) Ionta & Bécquer

Miconia vegaensis (Cogn.) Judd, Bécquer & Majure

Miconia velutina Triana

Miconia venosa (Gleason) Michelang.

Miconia ventricosa (Almeda) Almeda

Miconia venulosa Wurdack

Miconia veraguensis Gamba & Almeda

Miconia verapazana Michelang.

Miconia verrucosa Cogn.

Miconia verruculosa (Wurdack) P.Jørg. & C.Ulloa

Miconia versicolor Naudin

Miconia verticalis (N. Ruiz-R.) Michelang.

Miconia verticillifolia Michelang. & R. Goldenb.

Miconia vesca Wurdack

Miconia vesiculosa (Cogn.) R. Goldenb.

Miconia vestita Almeda

Miconia victorinii Alain

Miconia vilhenensis Wurdack

Miconia villonacensis Wurdack

Miconia vincentina (Urb.) Judd & Ionta

Miconia violacea Cogn.

Miconia violascens (Pilg.) Michelang. & R. Goldenb.

Miconia virescens (Vahl) Triana

Miconia virgata (Sw.) Skean, Judd & Majure

Miconia viridiflava (Brade) R. Goldenb.

Miconia viscidula Urb. & Ekman

Miconia viscosa (Cogn.) R. Goldenb.

Miconia vismioides Triana

Miconia vitiflora J.F. Macbr.

Miconia vittata (Linden & André) Cogn.

Miconia volcanalis (Standl. & Steyerm.) Michelang.

Miconia voronovii Gleason

Miconia vulcanicola (Donn. Sm.) Michelang.

Miconia vulcanidomatia Bécquer & Skean

Miconia wagneri J.F. Macbr.

Miconia waltercampii Michelang.

Miconia walterjuddii Bécquer & Michelang.

Miconia warmingiana Cogn.

Miconia weberbaueri Cogn.

Miconia weddellii Naudin

Miconia willdenowii Klotzsch ex Naudin

Miconia williamandersoniii Michelang.

Miconia wittii Ule

Miconia wolfei Wurdack

Miconia woodsii (Judd & Skean) Ionta, Judd & Skean

Miconia woytkowskii Wurdack

Miconia wrightii (Griseb.) Triana

Miconia wurdackii L. Uribe

Miconia xalapensis (Bonpl.) M. Gómez

Miconia xanthocoma (Naudin) R. Goldenb.

Miconia xantholasia (DC.) R. Goldenb.

Miconia xanthopogon (Naudin) R. Goldenb.

Miconia xanthostachya (Cogn.) R. Goldenb.

Miconia xenotricha Urb. & Ekman

Miconia yamanigueyensis Bécquer & Michelang.

Miconia yanachagaensis Michelang. & R. Goldenb.

Miconia yatuensis Wurdack

Miconia yeseniae W. Palacios, D. Fernández & Michelang.

Miconia yungasensis R. Goldenb. & Michelang.

Miconia yunquensis Judd, Bécquer & Majure

Miconia zamorensis Gleason

Miconia zanonii Judd, Skean & R.S. Beaman

Miconia zarucchii Wurdack

Miconia zemurrayana Standl. & L.O. Williams

Miconia zubenetana J.F. Macbr.

Microlicia abairana R. Romero & Woodgyer

Microlicia acuminata Naudin

Microlicia agrestis Cogn.

Microlicia amblysepala Ule

Microlicia amplexicaulis Cogn.

Microlicia arenariaefolia DC.

Microlicia aurea Wurdack

Microlicia aureoglandulosa Woodgyer & R. Romero

Microlicia avicularis Mart. ex Naudin

Microlicia baccharoides Mart. & Schrank ex Naudin

Microlicia bahiensis Markgr.

Microlicia balsamifera Mart.

Microlicia baumgratziana A.B. Martins & Koschn.

Microlicia benthamiana Triana

Microlicia blanchetiana Cogn.

Microlicia bradeana Hoehne

Microlicia caatingae J. Coelho & R. Romero

Microlicia canastrensis Naudin

Microlicia candolleana R. Romero & Versiane

Microlicia capitata R.Pacifico, Almeda & Fidanza

Microlicia catolensis Woodgyer & Zappi

Microlicia cerifera (Gardner) A.B. Martins & Almeda

Microlicia chrysantha Wurdack

Microlicia chrysoglandulosa R. Romero, Versiane, Fontelas & D.O. Diniz-Neres

Microlicia ciliatoglandulosa R. Romero

Microlicia cogniauxiana R. Romero

Microlicia colombiana H. Mend. & R. Romero

Microlicia comparilis Wurdack

Microlicia confertiflora Naudin

Microlicia consimilis Wurdack

Microlicia contasensis Woodgyer & Zappi

Microlicia cordata (Spreng.) Cham.

Microlicia coriacea R.Pacifico, Almeda & Fidanza

Microlicia crassa R. Romero

Microlicia crebropunctata Pilg.

Microlicia crenulata (DC.) Mart.

Microlicia crispa Woodgyer & R. Romero

Microlicia cryptandra Naudin

Microlicia cuneata Naudin

Microlicia curralensis Brade

Microlicia curticalycina R. Romero & Woodgyer

Microlicia cuspidifolia Mart. ex Naudin

Microlicia decipiens Naudin

Microlicia denudata Cogn.

Microlicia donii Fidanza & R.Pacifico

Microlicia edmundoi Brade

Microlicia elegans Naudin

Microlicia ericoides D. Don

Microlicia euphorbioides Mart.

Microlicia fasciculata Mart.

Microlicia flava R. Romero

Microlicia flavovirens Woodgyer & Zappi

Microlicia formosa Cham.

Microlicia frankii R.B. Pacifico & Fidanza

Microlicia furnensis R. Romero

Microlicia ganevii Woodgyer & R. Romero

Microlicia giuliettiana A.B. Martins & Almeda

Microlicia glazioviana Cogn.

Microlicia graveolens DC.

Microlicia guanayana Wurdack

Microlicia harleyi Wurdack

Microlicia hatschbachii Wurdack

Microlicia helvola (Spreng) Triana

Microlicia hirta Pataro & R. Romero

Microlicia hirticalyx R. Romero & Woodgyer

Microlicia hirtoferruginea Naudin

Microlicia hispidula Naudin

Microlicia humilis Naudin

Microlicia inquinans Naudin

Microlicia insignis Cham.

Microlicia intercalycina Pataro & R. Romero

Microlicia isophylla DC.

Microlicia isostemon Wurdack

Microlicia jungermannioides DC.

Microlicia juniperina A. St.-Hil.

Microlicia karinae R. Pacifico& Almeda

Microlicia latifolia D.O. Diniz-Neres & M.J. Silva

Microlicia leucopetala Wurdack

Microlicia linifolia (DC.) Cham.

Microlicia longicalycina R. Romero

Microlicia longipedicellata Almeda & A.B. Martins

Microlicia longirostrata R.Romero, Fontelas & Versiane

Microlicia longisepala Wurdack

Microlicia luetzelburgii Markgr.

Microlicia lutea Markgr.

Microlicia macedoi L.B. Sm. & Wurdack

Microlicia macropetala Pataro & R. Romero

Microlicia macrophylla Naudin

Microlicia maculata R. Romero

Microlicia martiana O. Berg ex Triana

Microlicia maximowicziana Cogn.

Microlicia melanostagma Pilg.

Microlicia mendoncaei Cogn.

Microlicia microphylla Cogn.

Microlicia minima Markgr.

Microlicia minutiflora Cogn.

Microlicia monticola Wurdack

Microlicia morii Wurdack

Microlicia morrensis R. Pacifico & Almeda

Microlicia mucugensis (Wurdack) Almeda & A.B. Martins

Microlicia multicaulis Mart. ex Naudin

Microlicia mutabilis R.Pacifico, Almeda & Fidanza

Microlicia myrtoidea Cham.

Microlicia naudiniana R. Romero

Microlicia neglecta Cogn.

Microlicia nervosa R. Romero

Microlicia noblickii (Wurdack) A.B. Martins & Almeda

Microlicia nodotricha Almeda &R.Pacifico

Microlicia nortecipoana R.B. Pacifico, Fidanza & Almeda

Microlicia oblongifolia Naudin

Microlicia obovatifolia R.B. Pacifico, Fidanza & Almeda

Microlicia obtusa Naudin

Microlicia obtusifolia Cogn. ex R. Romero

Microlicia oligochaeta Wurdack

Microlicia ordinata (Wurdack) Almeda & A.B. Martins

Microlicia oxyanthera Naudin

Microlicia pabstii Brade

Microlicia pacificoi Almeda & Fidanza

Microlicia parvula (Markgr.) Koschn. & A.B. Martins

Microlicia passerina Naudin

Microlicia peruviana Cogn.

Microlicia petasensis Wurdack

Microlicia petiolulata Cogn.

Microlicia pilosissima Cogn.

Microlicia pinheiroi Wurdack

Microlicia piranii R.Pacifico, Almeda & Fidanza

Microlicia plumosa Woodgyer & Zappi

Microlicia polychaeta R.Pacifico, Almeda & Fidanza

Microlicia polystemma Naudin

Microlicia psammophila Wurdack

Microlicia pulchra Pataro & R. Romero

Microlicia pusilla Cogn.

Microlicia ramosa Pilg.

Microlicia regeliana Cogn.

Microlicia reichardtiana Cogn.

Microlicia repanda R.Pacifico, Almeda & Fidanza

Microlicia restingae R. Romero & Woodgyer

Microlicia riedeliana Cogn.

Microlicia rotundifolia Ule

Microlicia rubra Ferreira-Alves & R.Romero

Microlicia rugosa R. Romero & Versiane

Microlicia sciophylla R.B. Pacifico & Fidanza

Microlicia scoparia DC.

Microlicia semiriana Kosch. & A.B.Martins

Microlicia serpyllifolia D. Don

Microlicia serrulata Cham.

Microlicia setosa DC.

Microlicia sickii Brade

Microlicia sincorensis Mart.

Microlicia sparsifolia R.Pacifico, Almeda & Fidanza

Microlicia sphagnicola Gleason

Microlicia stenodonoides D.O. Diniz-Neres & M.J. Silva

Microlicia stricta Cogn.

Microlicia subaequalis Wurdack

Microlicia subalata Wurdack

Microlicia suborbicularifolia Hoehne

Microlicia subsetosa DC.

Microlicia sulfurea Hoehne

Microlicia taxifolia Naudin

Microlicia tenuifolia R. Romero

Microlicia tetrasticha Cogn.

Microlicia tomentella Naudin

Microlicia torrendii Brade

Microlicia trembleyiformis Naudin

Microlicia trichocalycina DC.

Microlicia urceolata J. Coelho & R. Romero

Microlicia veadeirana D. O. Diniz-Neres & M. J. Silva

Microlicia vernicosa (A. Barreto ex Pedersoli) A.B. Martins & Almeda

Microlicia vestita DC.

Microlicia viminalis Triana

Microlicia viscida R. Romero & Versiane

Microlicia warmingiana Cogn.

Microlicia weddellii Naudin

Microlicia windischii Versiane, D.Nunes & R.Romero

Microlicia woodii R. Pacifico, Almeda & Fidanza

Microlicia wurdackiana Almeda & A.B. Martins

Monochaetum alpestre Naudin

Monochaetum amabile Almeda

Monochaetum amistadense Almeda

Monochaetum bonplandii (Kunth) Naudin

Monochaetum brachyurum Naudin

Monochaetum calcaratum (DC.) Triana

Monochaetum candollei Cogn.

Monochaetum carbonoi Alvear & Almeda

Monochaetum ciliatum Gleason

Monochaetum cinereum Gleason

Monochaetum compactum Almeda

Monochaetum cordatum Almeda

Monochaetum deppeanum (Schltdl. & Cham.) Naudin

Monochaetum dicranantherum Naudin

Monochaetum discolor H. Karst. ex Triana

Monochaetum ecaudatum Gleason

Monochaetum exaltatum Almeda

Monochaetum expansum (Gleason) Alvear & Almeda

Monochaetum floribundum (Schltdl.) Naudin

Monochaetum glanduliferum Triana

Monochaetum gleasonianum Wurdack

Monochaetum hartwegianum Naudin

Monochaetum humboldtianum Walp.

Monochaetum laxifolium Gleason

Monochaetum lindeneanum Naudin

Monochaetum linearifolium Almeda

Monochaetum lineatum (D. Don) Naudin

Monochaetum longicaudatum Alvear & Almeda

Monochaetum macrantherum Gleason

Monochaetum magdalenense Wurdack

Monochaetum mariae Wurdack

Monochaetum meridense Naudin

Monochaetum multiflorum (Bonpl.) Naudin

Monochaetum myrtoideum (Bonpl.) Naudin

Monochaetum neglectum Almeda

Monochaetum perijense Alvear & Almeda

Monochaetum pulchrum Decne.

Monochaetum rodriguezii Wurdack

Monochaetum rotundifolium Cogn. ex Gleason

Monochaetum rubescens Gleason

Monochaetum stellulatum Naudin

Monochaetum strigosum Cogn.

Monochaetum subditivum J.F. Macbr.

Monochaetum subglabrum Gleason

Monochaetum tachirense Wurdack

Monochaetum talamancense Almeda

Monochaetum tenellum Naudin

Monochaetum tonaense Alvear & Almeda

Monochaetum trichophyllum Almeda

Monochaetum uberrimum Sandwith

Monochaetum uribei Wurdack

Monochaetum vestitum Almeda, Al. Rodr. & Garita

Monochaetum vulcanicum Cogn.

Monolena bracteata Gleason

Monolena cordifolia Triana

Monolena coriacea Triana

Monolena dressleri R.H. Warner

Monolena elliptica L. Uribe

Monolena grandiloba R.H. Warner

Monolena guatemalensis Donn. Sm.

Monolena lanceolata L. Uribe

Monolena morleyi R.H. Warner

Monolena multiflora R.H. Warner

Monolena ovata Cogn.

Monolena panamensis R.H. Warner

Monolena pilosiuscula L. Uribe

Monolena primuliflora Hook. f.

Monolena pygmaea L. Uribe

Monolena trichopoda R.H. Warner

Mouriri acutiflora Naudin

Mouriri ambiconvexa Morley

Mouriri angulicosta Morley

Mouriri angustifolia Spruce ex Triana

Mouriri apiranga Spruce ex Triana

Mouriri arborea Gardner

Mouriri arenicola Morley

Mouriri bahiensis Morley

Mouriri barinensis (Morley) Morley

Mouriri brachyanthera Ducke

Mouriri brevipes Hook.

Mouriri cauliflora Mart. ex DC.

Mouriri cearensis Huber

Mouriri chamissoana Cogn.

Mouriri collocarpa Ducke

Mouriri colombiana Morley

Mouriri completens (Pittier) Burret

Mouriri crassifolia Sagot

Mouriri crassisepala Morley

Mouriri cyphocarpa Standl.

Mouriri densifoliata Ducke

Mouriri dimorphandra Morley

Mouriri domingensis (Tussac) Spach

Mouriri doriana Saldanha ex Cogn.

Mouriri duckeana Morley

Mouriri duckeanoides Morley

Mouriri dumetosa Cogn.

Mouriri elliptica Mart.

Mouriri emarginata Griseb.

Mouriri eugeniifolia Spruce ex Triana

Mouriri exadenia Morley

Mouriri exilis Gleason

Mouriri ficoides Morley

Mouriri floribunda Markgr.

Mouriri francavillana Cogn.

Mouriri froesii Morley

Mouriri gardneri Triana

Mouriri glazioviana Cogn.

Mouriri gleasoniana Standl.

Mouriri gonavensis Urb. & Ekman

Mouriri grandiflora DC.

Mouriri guianensis Aubl.

Mouriri helleri Britton

Mouriri huberi Cogn.

Mouriri impressinerva Morley

Mouriri lancifolia Urb. & Ekman

Mouriri latihila Morley

Mouriri laxiflora Morley

Mouriri longifolia (Kunth) Morley

Mouriri lunatanthera Morley

Mouriri megasperma Morley

Mouriri micradenia Ducke

Mouriri micranthera Morley

Mouriri monopora Morley

Mouriri morleyi R. Goldenb. & Meirelles

Mouriri muelleri Cogn.

Mouriri myrtifolia Spruce ex Triana

Mouriri myrtilloides (Sw.) Poir.

Mouriri nervosa Pilg.

Mouriri nigra (DC.) Morley

Mouriri obtusiloba Morley

Mouriri oligantha Pilg.

Mouriri osaensis Morley

Mouriri pachyphylla Burret

Mouriri panamensis Morley

Mouriri papillosa Morley

Mouriri pauciflora Spruce ex Cogn.

Mouriri peruviana Morley

Mouriri pranceana Morley

Mouriri pseudogeminata Pittier

Mouriri pusa Gardner ex Hook.

Mouriri regeliana Cogn.

Mouriri retentipetala Morley

Mouriri rhizophorifolia (DC.) Triana

Mouriri sagotiana Triana

Mouriri sellowiana (O. Berg) Burret

Mouriri sideroxylon Sagot ex Triana

Mouriri spathulata Griseb.

Mouriri spruceana Morley

Mouriri steyermarkii Standl.

Mouriri subumbellata Triana

Mouriri tessmannii Markgr.

Mouriri torquata Morley

Mouriri trunciflora Ducke

Mouriri tuberculata Morley & K. Thomsen

Mouriri uncitheca Morley & Wurdack

Mouriri valenzuelana A. Rich.

Mouriri vernicosa Naudin

Mouriri viridicosta Morley

Neblinanthera cumbrensis Wurdack

Nepsera aquatica (Aubl.) Naudin

Noterophila bivalvis (Aubl.) Kriebel & M.J.R.Rocha

Noterophila crassipes (Naudin) Kriebel & M.J.R.Rocha

Noterophila genliseoides (Hoehne) Kriebel & M.J.R.Rocha

Noterophila limnobios (DC.) Mart.

Noterophila nana (Ule) Kriebel & M.J.R.Rocha

Noterophila rosulans (Huber) Kriebel & M.J.R.Rocha

Ochthephilus repentinus Wurdack

Opisthocentra clidemioides Benth. & Hook. f.

Pachyloma coriaceum DC.

Pachyloma huberioides (Naudin) Triana

Pachyloma pusillum Wurdack

Pachyloma setosum Wurdack

Phainantha laxiflora (Triana) Gleason

Phainantha maguirei Wurdack

Phainantha myrteoloides Wurdack

Phainantha shuariorum C. Ulloa & D.A. Neill

Phainantha steyermarkii Wurdack

Physeterostemon aonae Amorim, Michelang. & R. Goldenb.

Physeterostemon fiaschii R. Goldenb. & Amorim

Physeterostemon gomesii Amorim & R. Goldenb.

Physeterostemon jardimii R. Goldenb. & Amorim

Physeterostemon thomasii Amorim, Michelang. & R. Goldenb.

Pilocosta campanensis (Almeda & Whiffin) Almeda

Pilocosta erythrophylla (Gleason) Almeda & Whiffin

Pilocosta nana (Standl.) Almeda & Whiffin

Pilocosta nubicola Almeda

Pilocosta oerstedii (Triana) Almeda & Whiffin

Pleroma ackermannii (Cogn.) P. J. F. Guim. & Michelang.

Pleroma ademarii (P.J.F.Guim., R.Romero & Leoni) P. J. F. Guim. & Michelang.

Pleroma aemulum (Schrank et Mart ex DC.) Triana

Pleroma alatum (Cogn.) P. J. F. Guim. & Michelang.

Pleroma amoenum (Herzog) P. J. F. Guim. & Michelang.

Pleroma andersregnellii P.J.F.Guim. & Michelang.

Pleroma angustifolium (Naud.) Triana

Pleroma apparicioi (Brade) P. J. F. Guim. & Michelang.

Pleroma arboreum Gardner

Pleroma arenarium (Cogn.) P. J. F. Guim. & Michelang.

Pleroma asperius (Cham.) Triana

Pleroma australe Triana

Pleroma axillare (Cogn.) P. J. F. Guim. & Michelang.

Pleroma bahiense (Wurdack) P. J. F. Guim. & Michelang.

Pleroma bandeirae P.J.F. Guim. & Michelang.

Pleroma barnebyanum (Wurdack) P. J. F. Guim. & Michelang.

Pleroma benthamianum Gardner

Pleroma bergianum (Cogn.) P. J. F. Guim. & Michelang.

Pleroma blanchetianum (Cogn.) P. J. F. Guim. & Michelang.

Pleroma boraceiensis (Brade) P. J. F. Guim. & Michelang.

Pleroma boudetii (P.J.F.Guim. & R.Goldenb.) P. J. F. Guim. & Michelang.

"Pleroma bracteolatum (J. G. Freitas, A. K. A.Santos & R. P.

Oliveira) P. J. F. Guim. & Michelang."

Pleroma caissarum F.S. Mey.

Pleroma candolleanum (Mart. ex. DC.) Triana

Pleroma canescens (D.Don) P. J. F. Guim. & Michelang.

Pleroma carajasense K. Rocha, R. Goldenb. & F.S. Mey.

Pleroma cardinale (Bonpl.) Triana

Pleroma carvalhoi (Wurdack) P. J. F. Guim. & Michelang.

Pleroma castellense (Brade) P. J. F. Guim. & Michelang.

Pleroma cecilianum P.J.F.Guim. & Oliveira da Silva

Pleroma cinereum (Cogn.) P. J. F. Guim. & Michelang.

Pleroma claussenii (Naud.) Triana

Pleroma clavatum (Persoon) P. J. F. Guim. & Michelang.

Pleroma cleistoflorum (Ule) P.J.F.Guim., Oliveira da Silva & Michelang.

Pleroma clidemioides Berg. ex Trianna

Pleroma collinum (Naudin) Triana

"Pleroma comosum (J. G. Freitas, A. K. A.Santos & R. P.

Oliveira) P. J. F. Guim. & Michelang."

Pleroma cordifolium (Cogn.) P. J. F. Guim. & Michelang.

Pleroma costatocalyx F.S. Mey., L. Kollmann & R. Goldenb.

Pleroma crassirame (Cogn.) P. J. F. Guim. & Michelang.

Pleroma cristatum (Brade) P. J. F. Guim. & Michelang.

Pleroma cryptadenum (Gleason) P. J. F. Guim. & Michelang.

Pleroma cucullatum F.S. Mey., Fraga & R. Goldenb.

Pleroma decemcostatum (Cogn.) P. J. F. Guim. & Michelang.

Pleroma dendroides (Naud.) Triana

Pleroma discolor (Brade) P. J. F. Guim. & Michelang.

Pleroma divaricatum (Cogn.) P. J. F. Guim. & Michelang.

Pleroma dubium (Cham) P. J. F. Guim. & Michelang.

Pleroma dusenii (Cogn.) P. J. F. Guim. & Michelang.

Pleroma echinatum Gardner

Pleroma edmundoi (Brade & Markgraf) P.J.F. Guim. & Michelang.

Pleroma eichleri (Cogn.) P. J. F. Guim. & Michelang.

Pleroma elegans Gardner

Pleroma estrellense (Raddi) P.J.F.Guim. & Michelang.

Pleroma ferricolum A.L.F.Oliveira, R.Romero & P.J.F. Guim.

Pleroma fissinervium (Schrank & Mart. ex DC.) Gardner

Pleroma floribundum (Cogn.) P. J. F. Guim. & Michelang.

Pleroma fontanae F.S. Mey., L. Kollmann & R. Goldenb.

Pleroma formosum (Cogn.) P. J. F. Guim. & Michelang.

Pleroma fornograndense F.S. Mey., R. Goldenb. & L. Kollmann

Pleroma fothergillae (Schrank et Mat. ex DC.) Triana

Pleroma foveolatum (Naud.) Triana

Pleroma fragae L. Kollmann & R. Goldenb.

Pleroma francavillanum (Cogn.) P. J. F. Guim. & Michelang.

Pleroma frigidulum (Schrank et Mart. ex DC.) Triana

Pleroma gardneri (Naud.) P. J. F. Guim. & Michelang.

Pleroma gaudichaudianum (DC.) A. Gray

Pleroma gertii P.J.F. Guim. & Michelang.

Pleroma glutinosum (Markgr.) P. J. F. Guim. & Michelang.

Pleroma goldenbergii (F.S. Mey., P.J.F. Guim. & Kozera) P. J. F. Guim. & Michelang.

Pleroma granulosum (Desr.) D. Don

Pleroma guartelaense F.S.Mey. & R.Goldenb.

Pleroma hatschbachii (Wurdack) P. J. F. Guim. & Michelang.

Pleroma heteromallum (D.Don) D.Don

Pleroma hirsutissimum (Cogn.) P. J. F. Guim. & Michelang.

Pleroma hospitum (Schrank et Mart. ex DC.) Triana

Pleroma integerrima (R.Romero & A.B.Martins) P.J.F. Guim. & Michelang.

Pleroma itatiaiae (Wawra) P. J. F. Guim. & Michelang.

Pleroma kleinii (Wurdack) P. J. F. Guim. & Michelang.

Pleroma kollmannianum F.S.Mey. & R.Goldenb.

Pleroma kuhlmannii (Brade) P. J. F. Guim. & Michelang.

Pleroma laevicaule (Cogn. ex Wurdack) P. J. F. Guim. & Michelang.

Pleroma langsdorffianum (Bonpl.) Triana

Pleroma leopodinense L.Kollmann & R.Goldenb.

Pleroma lhotzkyana (C. Presl.) Triana

Pleroma lilacinum (Cogn.) P. J. F. Guim. & Michelang.

Pleroma limae (Brade) P. J. F. Guim. & Michelang.

Pleroma lithophilum (Wurdack) P. J. F. Guim. & Michelang.

Pleroma luetzelburgii (Markgr.) P. J. F. Guim. & Michelang.

Pleroma lutzii (Brade) P. J. F. Guim. & Michelang.

Pleroma macrochiton (Mart. ex DC.) Triana

Pleroma manicatum (Cogn.) P. J. F. Guim. & Michelang.

Pleroma marinarum P.J.F.Guim. & Fraga

Pleroma martiale (Cham.) Triana

Pleroma martiusianum (DC.) P. J. F. Guim. & Michelang.

Pleroma marumbiense (Wurdack) P. J. F. Guim. & Michelang.

Pleroma maximilianum (DC.) Triana

Pleroma melanocalyx (R.Romero, P.J.F.Guim. & Leoni) P. J. F. Guim. & Michelang.

Pleroma mellobarretoi (Brade) P. J. F. Guim. & Michelang.

Pleroma michelangelii P.J.F. Guim. & J.G. Freitas

Pleroma microphyllum (Cogn. ex Schwacke) P. J. F. Guim. & Michelang.

Pleroma minus (R.Romero & A.B.Martins) P.J.F. Guim. & Michelang.

Pleroma minutiflorum (Cogn.) P. J. F. Guim. & Michelang.

Pleroma mirabile (Brade & Markgr.) P. J. F. Guim. & Michelang.

Pleroma molle (Cham.) Triana

Pleroma mosenii (Cogn.) P. J. F. Guim. & Michelang.

Pleroma mourae (Cogn.) P. J. F. Guim. & Michelang.

Pleroma mutabile (Vell.) Triana

Pleroma noblickii (Wurdack) P. J. F. Guim. & Michelang.

Pleroma nodosum (Wurdack ex Cogn.) P. J. F. Guim. & Michelang.

Pleroma ochypetala (Ruiz et Pavon) D. Don

Pleroma oleifolium (DC.) R. Romero & Versiane

Pleroma oreophilum (Wurdack) P. J. F. Guim. & Michelang.

Pleroma pallidum (Cogn.) P. J. F. Guim. & Michelang.

Pleroma pauloalvinii (Vinha) P. J. F. Guim. & Michelang.

Pleroma penduliflorum Fraga & P.J.F.Guim.

Pleroma pereirae (Brade & Markgr.) P. J. F. Guim. & Michelang.

Pleroma petiolatum (R.Romero & A.B.Martins) P.J.F. Guim. & Michelang.

Pleroma pilosum (Cogn.) P. J. F. Guim. & Michelang.

Pleroma quartzophilum (Brade) P. J. F. Guim. & Michelang.

Pleroma raddianum (DC.) Gardner

Pleroma radula (Markgr.) P. J. F. Guim. & Michelang.

Pleroma ramboi (Brade) P. J. F. Guim. & Michelang.

Pleroma redivivum O.Berg ex Triana

Pleroma regelianum (Cogn.) P. J. F. Guim. & Michelang.

Pleroma reitzii (Brade) P. J. F. Guim. & Michelang.

Pleroma riedelianum (Cogn.) P. J. F. Guim. & Michelang.

Pleroma rigidulum ((Naudin) Wurdack) P. J. F. Guim. & Michelang.

Pleroma riparium (Markgr.) P. J. F. Guim. & Michelang.

Pleroma robustm (Cogn.) P. J. F. Guim. & Michelang.

Pleroma rubrobracteatum (R.Romero & P.J.F.Guim.) P. J. F. Guim. & Michelang.

Pleroma rubrum J.G.Freitas

Pleroma rupicola (Hoehne) P. J. F. Guim. & Michelang.

Pleroma salviaefolium (Cham.) Triana

Pleroma scaberrimum Triana

Pleroma schenckii (Cogn.) P. J. F. Guim. & Michelang.

Pleroma schwackei (Cogn.) P. J. F. Guim. & Michelang.

Pleroma sellowianum (Cham) P. J. F. Guim. & Michelang.

Pleroma semidecandrum (Schrank et Mart. ex DC.) Triana

Pleroma setosociliatum (Cogn.) F.S.Mey. & F.B.Matos

Pleroma stellipile (Wurdack) P. J. F. Guim. & Michelang.

Pleroma stenocarpa (Schrank et Mart. ex DC.) Triana

Pleroma stipulaceum (Guimarães da Vinha) P. J. F. Guim. & Michelang.

Pleroma subglabrum (Wurdack) P. J. F. Guim. & Michelang.

Pleroma subsessilis F.S. Mey. & L. Kollmann

Pleroma taperoense (Wurdack) P. J. F. Guim. & Michelang.

Pleroma tedescoi (Meirelles, L.Kollmann & R.Goldenb.) P.J.F. Guim. & Michelang.

Pleroma thereminianum (DC.) Triana

Pleroma tomentulosum (Wurdack) P. J. F. Guim. & Michelang.

Pleroma trichopodum DC.

Pleroma trinervium P.J.F. Guim.

Pleroma tuberosum Gardner ex Triana

Pleroma urceolare (Schrank & Mart. ex DC.) Triana

Pleroma ursinum (Cham.) Triana

Pleroma urvilleanum (DC.) P.J.F.Guim. & Michelang.

Pleroma velutinum (Naud.) Triana

Pleroma venetiense F.S. Mey., L. Kollmann & R. Goldenb.

Pleroma villosissimum Mart. ex.Triana

Pleroma vimineum (D. Don) D. Don

Pleroma virgatum Gardner

Pleroma wurdackianum (R.Romero & A.B.Martins) P.J.F. Guim. & Michelang.

Poteranthera annectans Wurdack

Poteranthera leptalea (Almeda) M. J. Rocha, P.J.F. Guim. & R. Romero

Poteranthera pusilla Bong.

Poteranthera warmingii (Cogn.) Almeda & R.Pacifico

Poteranthera windischii Kriebel

Pseudoernestia cordifolia (O.Berg ex Triana) Krasser

Pseudoernestia glandulosa (Gleason) M.J.R.Rocha & P.J.F.Guim.

Pterogastra divaricata (Bonpl.) Naudin

Pterogastra major Triana

Pterogastra minor Naudin

Pterolepis alpestris Triana

Pterolepis buraeavii Cogn.

Pterolepis cataphracta (Cham.) Triana

Pterolepis cearensis Huber

Pterolepis glomerata (Rottb.) Miq.

Pterolepis haplostemona Almeda & A.B. Martins

Pterolepis parnassiifolia (DC.) Triana

Pterolepis perpusilla Cogn.

Pterolepis piatensis (S.S. Renner) J.G. Freitas & A.K.A. Santos

Pterolepis picorondonica S.S. Renner

Pterolepis polygonoides Triana

Pterolepis repanda (DC.) Triana

Pterolepis riedeliana Cogn.

Pterolepis rotundifolia Wurdack

Pterolepis stenophylla Gleason

Pterolepis trichotoma (Rottb.) Cogn.

Quipuanthus epipetricus Michelang. & C. Ulloa

Rhexia alifanus Walter

Rhexia aristosa Britton

Rhexia cubensis Griseb.

Rhexia interior Pennell

Rhexia lutea Walter

Rhexia mariana L.

Rhexia nashii Small

Rhexia nuttallii C.W. James

Rhexia parviflora Chapm.

Rhexia petiolata Walter

Rhexia salicifolia Kral & Bostick

Rhexia ventricosa Fernald & Griscom

Rhexia virginica L.

Rhynchanthera acuminata Benth.

Rhynchanthera apurensis Wurdack

Rhynchanthera brachyrhyncha Cham.

Rhynchanthera bracteata Triana

Rhynchanthera cordata DC.

Rhynchanthera dichotoma (Desr.) DC.

Rhynchanthera gardneri Naudin

Rhynchanthera grandiflora (Aubl.) DC.

Rhynchanthera hassleriana Kraenzl.

Rhynchanthera hispida Naudin

Rhynchanthera latifolia Cogn.

Rhynchanthera mexicana DC.

Rhynchanthera novemnervia DC.

Rhynchanthera paludicola (Donn. Sm.) Gleason

Rhynchanthera rosea Cogn.

Rhynchanthera secundiflora Naudin

Rhynchanthera serrulata (Rich.) DC.

Rhynchanthera ternata Cogn.

Rhynchanthera ursina Naudin

Rhynchanthera verbenoides Cham.

Rostranthera tetraptera (Cogn.) M.J.R.Rocha & P.J.F.Guim.

Rupestrea carvalhoana (Baumgratz & D'El Rei Souza) Almeda, Michelang. & R. Goldenb.

Rupestrea johnwurdakiana (Baumgratz & D'El Rei Souza) Michelang., Almeda & R. Goldenb.

Salpinga ciliata Pilg.

Salpinga dimorpha (Gleason) Wurdack

Salpinga glandulosa (Gleason) Wurdack

Salpinga longifolia (Cham.) Triana

Salpinga maguirei Gleason

Salpinga maranonensis Wurdack

Salpinga paleacea Wurdack

Salpinga peruviana (Cogn.) Wurdack

Salpinga pusilla (Gleason) Wurdack

Salpinga secunda Schrank & Mart. ex DC.

Sandemania hoehnei (Cogn.) Wurdack

Schwackaea cupheoides (Benth.) Cogn.

Siphanthera arenaria (DC.) Cogn.

Siphanthera cordata Pohl ex DC.

Siphanthera cordifolia (Benth.) Gleason

Siphanthera cowanii Wurdack

Siphanthera dawsonii Wurdack

Siphanthera duidae (Gleason) Wurdack

Siphanthera fasciculata (Gleason) Almeda & O.R. Rob.

Siphanthera foliosa (Naudin) Wurdack

Siphanthera gracillima (Naudin) Wurdack

Siphanthera hostmannii Cogn.

Siphanthera paludosa (DC.) Cogn.

Siphanthera subtilis Pohl ex DC.

Siphanthera todziae Almeda & O.R. Rob.

Siphanthera vaupesana Wurdack

Siphanthera wurdackii Almeda & O.R. Rob.

Stanmarkia medialis (Standl. & Steyerm.) Almeda

Stanmarkia spectabilis Almeda

Stenodon gracilis O. Berg ex Triana

Stenodon suberosus Naudin

Tateanthus duidae Gleason

Tessmannianthus calcaratus (Gleason) Wurdack

Tessmannianthus carinatus Almeda

Tessmannianthus cenepensis Wurdack

Tessmannianthus cereifolius Almeda

Tessmannianthus gordonii Almeda

Tessmannianthus heterostemon Markgr.

Tessmannianthus quadridomius Wurdack

Tibouchina aegopogon (Naud.) Cogn.

Tibouchina alata (Wurdack ex Cogn.) P.J.F. Guim. & Michelang.

Tibouchina albescens Cogn. ex P.J.F. Guim., A.L.F. Oliveira & R. Romero

Tibouchina araguaiensis P.J.F.Guim.

Tibouchina aspera Aubl.

Tibouchina barbigera (Naudin) Baill.

Tibouchina bicolor (Naudin) Cogn.

Tibouchina bipenicillata (Naudin) Cogn.

Tibouchina brevisepala Cogn.

Tibouchina bruniana P.J.F.Guim.

Tibouchina caatingae J.G. Freitas

Tibouchina calycina Cogn.

Tibouchina catharinae Pittier

Tibouchina cubense (A.Rich.) M.Gómez

Tibouchina cujabensis Cogn.

Tibouchina dissitiflora Wurdack

Tibouchina duidae Gleason

Tibouchina edmundoi Brade

Tibouchina exasperata (Naudin) Cogn.

Tibouchina fraterna N.E.Br.

Tibouchina fraterna subsp. paruana Wurdack

Tibouchina huberi Wurdack

Tibouchina johnwurdackiana Todzia

Tibouchina karstenii Cogn.

Tibouchina llanorum Wurdack

Tibouchina mathaei Cogn.

Tibouchina melastomoides (Naudin) Cogn.

Tibouchina nigricans Cogn. ex P.J.F.Guim., A.L.F. Oliveira & R.Romero

Tibouchina octopetala Cogn. ex Britton

Tibouchina papyrus (Pohl) Toledo

Tibouchina pogonanthera (Naudin) Cogn.

Tibouchina rosanae P.J.F.Guim. & Woodgyer

Tibouchina sickii Brade

Tibouchina sipapoana Gleason

Tibouchina spruceana Cogn.

Tibouchina steyermarkii Wurdack

Tibouchina striphnocalyx (DC.) Pittier

Tibouchina verticillaris Cogn.

Tibouchina xochiatencana de Santiago

Trembleya acuminata R.Pacifico & Fidanza

Trembleya altoparaisensis R. Pacifico, Almeda & Fidanza

Trembleya calycina Cham.

Trembleya chamissoana Naudin ex Cogn.

Trembleya elegans (Cogn.) Almeda & A.B. Martins

Trembleya hatschbachii Wurdack & E.Martins

Trembleya laniflora (D. Don) Cogn.

Trembleya neopyrenaica Naudin

Trembleya parviflora (D. Don) Cogn.

Trembleya pentagona Naudin

Trembleya phlogiformis DC.

Trembleya pithyoides Cham.

Trembleya pradosiana Netto

Trembleya rosmarinoides DC.

Trembleya thomazii R.B. Pacifico & Fidanza

Trembleya tridentata Naudin

Triolena agrimonioides (Triana) Almeda & Alvear

Triolena allardii (Wurdack) Wurdack

Triolena amazonica (Pilg.) Wurdack

Triolena asplundii Wurdack

Triolena auriculata (Triana) Almeda & Alvear

Triolena barbeyana Cogn.

Triolena calciphila (Standl. & Steyerm.) Standl. & L.O. Williams

Triolena campii (Wurdack) Wurdack

Triolena dressleri Wurdack

Triolena hirsuta (Benth.) Triana

Triolena hygrophylla (Naudin) L.O. Williams

Triolena izabalensis Standl. & Steyerm.

Triolena lanceolata (Gleason) Almeda & Alvear

Triolena obliqua (Triana) Wurdack

Triolena paleacea (Triana) Almeda & Alvear

Triolena paleolata Donn. Sm.

Triolena pedemontana Wurdack

Triolena pileoides (Triana) Wurdack

Triolena pluvialis (Wurdack) Wurdack

Triolena pumila Umaña & Almeda

Triolena purpurea (Gleason) Almeda & Alvear

Triolena pustulata Triana

Triolena rojasae Michelang. & R. Goldenb.

Triolena scorpioides Naudin

Triolena spicata (Triana) L.O. Williams

Triolena stenophylla (Standl. & Steyerm.) Standl. & L.O. Williams

Triolena vasquezii Michelang. & R.Goldenb.

Tryssophyton merumense Wurdack

Tryssophyton quadrifolius K.Wurdack & Michelang.

Votomita cupuliformis Morley & Almeda

Votomita guianensis Aubl.

Votomita monadelpha (Ducke) Morley

Votomita monantha (Urb.) Morley

Votomita orbinaxia Morley

Votomita orinocensis Morley

Votomita plerocarpa (Morley) Morley

Votomita pubescens Morley

Votomita roraimensis Morley

Votomita ventuarensis Morley

Wurdastom bullata (Wurdack) B. Walln.

Wurdastom cuatrecasasii (Wurdack) B. Walln.

Wurdastom dorrii (Wurdack) B. Walln.

Wurdastom dudleyi (Wurdack) B. Walln.

Wurdastom ecuadorense (Wurdack) B. Walln.

Wurdastom hexamera (Wurdack) B. Walln.

Wurdastom lateriflora Humberto Mend.

Wurdastom sneidernii (Wurdack) B. Walln.

Wurdastom subglabra (Wurdack) B. Walln.
